# Supplementary material for: A systematic genetic screen for genes involved in sensing inorganic phosphate availability in Saccharomyces cerevisiae
Source: PLoS One. 2017 May 17;12(5):e0176085. doi: 10.1371/journal.pone.0176085 (PMC5435139; doi:10.1371/journal.pone.0176085)
Supplement: S3 Table — (XLSX) [file pone.0176085.s004.xlsx]

## Sheet: all single mutants in 50 µM Pi
Gene_systematic name	Gene_generic name	average_log2(YFP/RFP) (0=wild type in 50 µM Pi)	standard deviation_log2(YFP/RFP)	p-value of measurement errors	detected number
YFR034C	PHO4	-5.51612	0.121848	4.12081e-33	3
YGR233C	PHO81	-5.17573	0.0725842	1.14204e-29	3
YDL106C	PHO2	-5.0425	0.433604	2.19258e-28	3
YDR174W	HMO1	-3.95442	0.371197	3.29794e-13	2
YMR309C	NIP1	-3.90205	0.497667	6.05429e-13	2
YGR268C	HUA1	-3.87695	0.20776	8.0631e-13	2
YGR159C	NSR1	-3.75501	0.565095	1.28767e-17	3
YPR044C	OPI11	-3.73455	0.0777448	3.99174e-12	2
YJL175W		-3.70993	0.579263	5.2537e-12	2
YGR272C		-3.53504	0.0699027	3.33266e-11	2
YPR045C		-3.515	0.93688	6.22249e-16	3
YDR306C		-3.42529	0.189735	1.03613e-10	2
YDR266C		-3.40543	0.0778002	1.2688e-10	2
YPL249C-A	RPL36B	-3.36338	1.45735	6.04444e-15	3
YDR382W	RPP2B	-3.35197	0.312325	7.27391e-15	3
YOL093W	TRM10	-3.32182	0.342563	2.96387e-10	2
YJR151W-A		-3.26584	1.2758	2.51738e-14	3
YDR308C	SRB7	-3.24305	0.763281	3.47898e-14	3
YHR010W	RPL27A	-3.17095	1.00529	9.72471e-14	3
YBR289W	SNF5	-3.16884	0.127992	1.00716e-13	3
YDL212W	SHR3	-3.13196	0.263706	1.83507e-09	2
YGL188C-A		-3.09389	0.472683	2.59861e-09	2
YIR019C	MUC1	-3.06755	0.0730889	3.26977e-09	2
YLR127C	APC2	-3.03732	0.342575	4.39636e-09	2
YDR314C	RAD34	-3.00153	0.317299	6.02738e-09	2
YHR041C	SRB2	-2.99895	0.907526	1.02694e-12	3
YDR176W	NGG1	-2.98969	1.4692	1.17283e-12	3
YIL014W	MNT3	-2.98896	0.623721	6.74078e-09	2
YLL043W	FPS1	-2.98659	1.28872	1.21235e-12	3
YGL018C	JAC1	-2.94817	0.256616	9.61393e-09	2
YHL023C	RMD11	-2.94633	0.60096	9.82819e-09	2
YDR263C	DIN7	-2.83404	1.10854	2.60282e-08	2
YER123W	YCK3	-2.83287	0.144826	8.72154e-12	3
YBL027W	RPL19B	-2.82375	0.236414	9.89351e-12	3
YOR309C		-2.80777	0.594827	1.19442e-11	3
YMR260C	TIF11	-2.79448	0.897369	3.64894e-08	2
YJL188C	BUD19	-2.74765	3.16436	5.3081e-08	2
YBR288C	APM3	-2.71804	0.647454	3.62945e-11	3
YLR062C	BUD28	-2.66633	0.481044	6.83988e-11	3
YLR061W	RPL22A	-2.64923	0.474119	8.42878e-11	3
YGR263C	SAY1	-2.64092	0.330188	1.27066e-07	2
YOR141C	ARP8	-2.62201	0.925048	1.16763e-10	3
YCL005W-A	VMA9	-2.61992	1.62323	1.51931e-07	2
YMR053C	STB2	-2.60899	0.0925842	1.3528e-10	3
YML122C		-2.57159	0.658611	2.09665e-10	3
YKL075C		-2.56282	1.18444	2.28727e-10	3
YPL084W	BRO1	-2.53638	0.603425	3.1415e-10	3
YLL021W	SPA2	-2.51915	0.386357	3.83915e-10	3
YNL010W		-2.48711	0.143603	5.55601e-10	3
YPR051W	MAK3	-2.45279	0.431959	8.01189e-10	3
YBR196C-A		-2.44043	0.31608	9.21453e-10	3
YDR079C-A	TFB5	-2.43772	1.02894	6.0461e-07	2
YOR113W	AZF1	-2.43469	0.710942	1.00187e-09	3
YIR033W	MGA2	-2.41556	0.348404	7.14284e-07	2
YLR184W		-2.41279	0.827677	1.2512e-09	3
YJL024C	APS3	-2.40353	0.312886	1.39758e-09	3
YBR266C	SLM6	-2.34031	0.765226	2.7713e-09	3
YOR096W	RPS7A	-2.33448	0.629613	1.30196e-06	2
YGR269W		-2.31892	0.523338	1.44952e-06	2
YMR126C	DLT1	-2.30555	0.538078	4.04581e-09	3
YHL011C	PRS3	-2.29335	0.602132	4.62736e-09	3
YHR034C	PIH1	-2.28899	0.0937213	4.88217e-09	3
YLR221C	RSA3	-2.27498	1.46763	1.99394e-06	2
YMR054W	STV1	-2.24713	0.157563	7.67953e-09	3
YHR030C	SLT2	-2.23754	0.168374	8.3146e-09	3
YCL005W	LDB16	-2.23514	1.81801	2.59159e-06	2
YOR221C	MCT1	-2.23061	0.337621	9.00094e-09	3
YGL148W	ARO2	-2.22118	0.523847	2.87558e-06	2
YHR203C	RPS4B	-2.21186	1.09131	1.11136e-08	3
YKL065C	YET1	-2.181	1.37715	1.52207e-08	3
YHR149C	SKG6	-2.17709	0.435871	3.91687e-06	2
YHR151C	MTC6	-2.1735	0.284892	1.64604e-08	3
YKL144C	RPC25	-2.15362	0.236916	2.02703e-08	3
YEL062W	NPR2	-2.14034	0.425751	2.30771e-08	3
YLR068W	FYV7	-2.13402	1.22137	2.49405e-08	3
YML014W	TRM9	-2.08745	0.287849	4.0676e-08	3
YDR073W	SNF11	-2.08081	0.470064	4.28142e-08	3
YLR428C		-2.04987	0.50906	5.96636e-08	3
YAL044C	GCV3	-2.04894	0.820019	5.96636e-08	3
YPL180W	TCO89	-2.03839	0.123077	6.60518e-08	3
YHR067W	HTD2	-2.03075	0.816047	7.12796e-08	3
YFR005C	SAD1	-2.02765	0.62179	7.31109e-08	3
YOL145C	CTR9	-2.02017	1.58418	7.88868e-08	3
YER061C	CEM1	-2.01215	0.586539	8.72905e-08	3
YKL063C		-2.00986	1.19132	8.95252e-08	3
YGR063C	SPT4	-2.00515	0.414292	9.18163e-08	3
YNL119W	NCS2	-1.96107	0.0791419	1.4443e-07	3
YMR242C	RPL20A	-1.95116	0.252888	1.59652e-07	3
YGL066W	SGF73	-1.9429	0.254797	1.72093e-07	3
YJL121C	RPE1	-1.93708	0.189687	1.85487e-07	3
YNL120C		-1.9253	0.218088	2.0495e-07	3
YNL068C	FKH2	-1.90697	0.126047	2.50093e-07	3
YLR363W-A		-1.90073	0.313798	2.62827e-07	3
YPL193W	RSA1	-1.90058	0.292098	2.39375e-05	2
YFL018C	LPD1	-1.89724	0.0161184	2.76198e-07	3
YGL246C	RAI1	-1.89313	0.746037	2.83131e-07	3
YGR252W	GCN5	-1.89158	0.220697	2.55176e-05	2
YBR035C	PDX3	-1.88695	0.197073	3.04975e-07	3
YFR030W	MET10	-1.88232	0.434001	3.2045e-07	3
YAR003W	SWD1	-1.87468	0.314383	3.45119e-07	3
YML113W	DAT1	-1.87036	0.265227	3.53749e-07	3
YDR290W		-1.87016	0.293329	2.899e-05	2
YKL129C	MYO3	-1.86698	0.497924	2.9928e-05	2
YPR123C		-1.86166	0.41322	3.90442e-07	3
YPR153W		-1.85972	0.340782	4.00184e-07	3
YDR045C	RPC11	-1.85254	0.15851	4.20391e-07	3
YNL301C	RPL18B	-1.8462	0.812316	4.52594e-07	3
YGL070C	RPB9	-1.84226	0.132716	4.75396e-07	3
YJR065C	ARP3	-1.8397	0.155948	4.87216e-07	3
YGR160W		-1.83467	1.02906	5.11729e-07	3
YOR294W	RRS1	-1.83234	0.0494153	5.24435e-07	3
YMR243C	ZRC1	-1.83176	0.553498	5.24435e-07	3
YPR197C		-1.82545	0.503963	5.50784e-07	3
YER129W	SAK1	-1.82538	0.401626	5.50784e-07	3
YIR024C		-1.81869	0.102731	4.04656e-05	2
YBR084C-A	RPL19A	-1.81003	0.693195	6.37873e-07	3
YEL053C	MAK10	-1.79477	0.758327	7.5664e-07	3
YGL080W	FMP37	-1.79085	0.17829	7.75288e-07	3
YPL050C	MNN9	-1.78829	1.13818	7.94386e-07	3
YIL133C	RPL16A	-1.77541	0.240666	5.29478e-05	2
YLR345W		-1.77097	0.0634489	9.41609e-07	3
YNL069C	RPL16B	-1.77001	0.49667	9.41609e-07	3
YPR043W	RPL43A	-1.76605	1.85017	9.88374e-07	3
YDR448W	ADA2	-1.76575	1.64731	9.88374e-07	3
YKL162C		-1.75056	1.38593	1.14274e-06	3
YDL133W		-1.75018	0.590578	1.14274e-06	3
YOR083W	WHI5	-1.74922	0.938179	1.17067e-06	3
YLR056W	ERG3	-1.74309	0.709795	1.22854e-06	3
YPR189W	SKI3	-1.73969	0.406749	1.28921e-06	3
YDL029W	ARP2	-1.73401	0.112039	1.35281e-06	3
YDR404C	RPB7	-1.73318	0.372827	1.35281e-06	3
YER176W	ECM32	-1.73026	0.106792	1.38574e-06	3
YDR069C	DOA4	-1.72961	1.50146	1.41947e-06	3
YER156C		-1.72533	0.112827	7.25875e-05	2
YMR010W		-1.71667	0.332672	1.6005e-06	3
YJL095W	BCK1	-1.7069	1.02354	1.7614e-06	3
YNL067W	RPL9B	-1.69124	0.24572	2.03277e-06	3
YGL158W	RCK1	-1.68673	0.26036	2.13199e-06	3
YOR283W		-1.68174	0.369654	2.23593e-06	3
YMR203W	TOM40	-1.68143	0.445352	2.23593e-06	3
YJL120W		-1.67989	0.288591	2.28974e-06	3
YIR020C		-1.66972	0.671561	0.000104278	2
YLR151C	PCD1	-1.6689	1.24579	2.5179e-06	3
YGR072W	UPF3	-1.66317	0.121423	2.64014e-06	3
YLR448W	RPL6B	-1.66185	0.774163	2.70342e-06	3
YER179W	DMC1	-1.65958	1.43937	2.76817e-06	3
YOR138C	RUP1	-1.65943	1.18745	2.76817e-06	3
YKL199C		-1.65938	0.00079972	0.000111056	2
YBL071W-A	KTI11	-1.65134	0.869434	2.97162e-06	3
YDL100C	GET3	-1.63797	0.234905	3.34353e-06	3
YPL134C	ODC1	-1.63737	0.409565	3.42317e-06	3
YBR255W	MTC4	-1.63464	0.0227267	3.50465e-06	3
YLR436C	ECM30	-1.63067	0.174567	0.000132056	2
YMR172W	HOT1	-1.62194	0.619894	3.94125e-06	3
YJR011C		-1.61803	3.12079	4.03471e-06	3
YOL097W-A		-1.61656	0.613483	4.13032e-06	3
YER175C	TMT1	-1.61536	0.443865	4.13032e-06	3
YIL102C		-1.61408	0.297938	4.22814e-06	3
YKL009W	MRT4	-1.60985	0.323197	4.43057e-06	3
YOR165W	SEY1	-1.60955	1.33552	0.00015216	2
YKL114C	APN1	-1.60898	0.489964	0.00015216	2
YLR021W	IRC25	-1.60836	0.135415	4.43057e-06	3
YPL196W	OXR1	-1.60329	0.239201	4.64242e-06	3
YCR086W	CSM1	-1.60114	0.580419	4.75201e-06	3
YNL139C	THO2	-1.58097	0.380884	5.72395e-06	3
YMR171C	EAR1	-1.57632	0.7513	5.99561e-06	3
YKL098W	MTC2	-1.57346	0.799645	6.13608e-06	3
YKL077W		-1.56608	0.89837	6.57696e-06	3
YGR043C	NQM1	-1.56499	0.872462	0.000202024	2
YLR389C	STE23	-1.56092	0.644049	6.88779e-06	3
YPR114W		-1.5536	0.47041	7.38092e-06	3
YGR034W	RPL26B	-1.5534	0.554447	0.000215159	2
YOR385W		-1.54838	1.30071	7.72851e-06	3
YLR337C	VRP1	-1.54283	0.0168518	8.09196e-06	3
YLR447C	VMA6	-1.53585	0.342265	8.66836e-06	3
YDL117W	CYK3	-1.53377	0.472229	8.86919e-06	3
YBL067C	UBP13	-1.52797	0.225119	9.28447e-06	3
YMR242W-A		-1.52771	0.626219	9.28447e-06	3
YJL008C	CCT8	-1.52718	0.0694421	9.49911e-06	3
YIL135C	VHS2	-1.52659	1.05055	0.000255851	2
YMR016C	SOK2	-1.49863	0.255396	1.22011e-05	3
YLR225C		-1.49315	0.87147	0.000313952	2
YIL123W	SIM1	-1.49209	0.386616	1.30586e-05	3
YOR043W	WHI2	-1.48907	0.835403	1.33572e-05	3
YDR034C	LYS14	-1.48251	0.40985	1.39743e-05	3
YPR016C	TIF6	-1.48056	0.343446	1.42932e-05	3
YOR025W	HST3	-1.47906	1.41335	1.4619e-05	3
YDR202C	RAV2	-1.47104	0.144424	1.56403e-05	3
YOR258W	HNT3	-1.46085	0.500162	0.000385183	2
YHR033W		-1.45997	0.345664	1.74976e-05	3
YMR274C	RCE1	-1.45863	0.191255	1.74976e-05	3
YKL178C	STE3	-1.45705	1.04492	1.78938e-05	3
YGL202W	ARO8	-1.45024	0.199131	1.87125e-05	3
YKR010C	TOF2	-1.4495	0.279019	1.91353e-05	3
YIL152W		-1.4494	0.58129	1.91353e-05	3
YDR261C	EXG2	-1.44861	0.0452585	0.00041667	2
YNL108C		-1.44743	0.327771	1.95674e-05	3
YOR299W	BUD7	-1.44313	0.829147	2.00088e-05	3
YER101C	AST2	-1.44169	0.0444795	0.000436773	2
YGL127C	SOH1	-1.44165	1.08728	0.000436773	2
YLR427W	MAG2	-1.4415	0.277363	2.04599e-05	3
YIL137C	TMA108	-1.43156	0.346434	0.00046508	2
YPR101W	SNT309	-1.42899	2.22229	0.000472436	2
YLR150W	STM1	-1.42888	0.398189	2.28669e-05	3
YCR047C	BUD23	-1.42692	1.26501	0.000479907	2
YNR025C		-1.42578	0.808585	2.33801e-05	3
YHR066W	SSF1	-1.42261	0.160991	2.39044e-05	3
YLR089C	ALT1	-1.42188	0.608357	2.44401e-05	3
YIL085C	KTR7	-1.41888	0.41436	2.49874e-05	3
YER135C		-1.41359	0.280221	2.61178e-05	3
YIL128W	MET18	-1.40934	0.662483	2.72975e-05	3
YDR498C	SEC20	-1.40499	0.280301	2.85287e-05	3
YMR070W	MOT3	-1.40428	0.0945701	0.000552621	2
YLR209C	PNP1	-1.40207	1.40909	0.000561342	2
YBL072C	RPS8A	-1.39819	0.555489	2.98135e-05	3
YDR095C		-1.3973	0.760361	3.04767e-05	3
YML007C-A		-1.39565	0.220556	3.04767e-05	3
YFL016C	MDJ1	-1.39268	0.670755	0.00058833	2
YKL071W		-1.3925	0.876294	0.00058833	2
YJR107W		-1.38549	0.332996	3.32751e-05	3
YPR131C	NAT3	-1.38195	0.972042	3.47659e-05	3
YNL332W	THI12	-1.38146	1.08785	3.47659e-05	3
YIL110W	MNI1	-1.378	0.190615	3.55354e-05	3
YIR026C	YVH1	-1.37327	0.311776	0.000666694	2
YPR060C	ARO7	-1.36887	1.43692	3.87812e-05	3
YPR049C	ATG11	-1.36794	0.477927	0.000687835	2
YPL037C	EGD1	-1.36564	0.658112	3.96364e-05	3
YDR137W	RGP1	-1.36455	0.332118	4.05099e-05	3
YOR293W	RPS10A	-1.35213	0.789192	4.51643e-05	3
YJL178C	ATG27	-1.35154	0.537793	4.51643e-05	3
YPR185W	ATG13	-1.34926	0.11819	4.61554e-05	3
YGR271C-A	EFG1	-1.3487	1.92252	4.61554e-05	3
YBR221C	PDB1	-1.34852	1.04627	0.000779167	2
YOL052C-A	DDR2	-1.34234	0.198785	4.92568e-05	3
YML111W	BUL2	-1.33826	0.457021	5.03347e-05	3
YIR004W	DJP1	-1.33293	0.111214	5.25595e-05	3
YOR325W		-1.33225	0.502679	5.37074e-05	3
YGL029W	CGR1	-1.32571	0.397392	5.60765e-05	3
YLR449W	FPR4	-1.32552	0.383977	5.60765e-05	3
YHR137W	ARO9	-1.32101	0.164211	5.85467e-05	3
YKL142W	MRP8	-1.3194	1.54744	0.00093877	2
YAL037C-A		-1.31801	0.273545	5.98211e-05	3
YNL190W		-1.31747	0.540208	6.11223e-05	3
YGL046W		-1.30848	0.430117	6.5193e-05	3
YGR085C	RPL11B	-1.30363	0.503984	6.80516e-05	3
YPR050C		-1.30308	0.585924	6.80516e-05	3
YGR200C	ELP2	-1.30015	0.365953	6.95262e-05	3
YOL046C		-1.29989	0.356234	7.10318e-05	3
YNR004W		-1.29609	0.560937	7.2569e-05	3
YFR025C	HIS2	-1.2921	0.416538	7.5741e-05	3
YBR021W	FUR4	-1.29083	0.245273	7.5741e-05	3
YBR031W	RPL4A	-1.28682	0.298526	0.00114752	2
YJR082C	EAF6	-1.27635	0.34905	8.60867e-05	3
YGR107W		-1.2761	1.02261	8.60867e-05	3
YJL155C	FBP26	-1.27229	0.0964239	8.98312e-05	3
YDL081C	RPP1A	-1.27217	1.11279	8.98312e-05	3
YDR127W	ARO1	-1.2688	0.35301	9.17625e-05	3
YJL064W		-1.26862	0.272652	9.17625e-05	3
YBR164C	ARL1	-1.26251	0.0807796	0.00131763	2
YDR286C		-1.25453	0.694102	0.0014008	2
YOL162W		-1.25451	0.0617645	0.000104228	3
YBR191W	RPL21A	-1.25387	2.77625	0.000104228	3
YFL002C	SPB4	-1.24276	0.120052	0.000113439	3
YCR063W	BUD31	-1.23797	0.311384	0.000118337	3
YGL215W	CLG1	-1.23749	1.17374	0.000120863	3
YLR429W	CRN1	-1.23482	0.222782	0.000123442	3
YPL038W-A		-1.23456	0.331134	0.000123442	3
YOR027W	STI1	-1.23403	0.505214	0.000123442	3
YKL039W	PTM1	-1.23356	0.593617	0.000123442	3
YMR305C	SCW10	-1.23058	0.671265	0.000126074	3
YGL100W	SEH1	-1.23056	0.205219	0.000126074	3
YLR446W		-1.2256	0.147478	0.000131505	3
YOL104C	NDJ1	-1.22541	0.214868	0.000131505	3
YHR077C	NMD2	-1.22455	0.209514	0.000134305	3
YJL213W		-1.22054	0.408045	0.000137163	3
YPR188C	MLC2	-1.21888	0.099938	0.000140081	3
YBR175W	SWD3	-1.21731	0.487498	0.000143059	3
YGL045W	RIM8	-1.21461	0.585786	0.0001461	3
YJR039W		-1.21443	0.285891	0.0001461	3
YDR024W	FYV1	-1.21291	0.780896	0.0001461	3
YMR312W	ELP6	-1.21117	0.614242	0.000149203	3
YKL205W	LOS1	-1.20906	0.0424627	0.00184141	2
YMR247W-A		-1.209	0.0186798	0.00184141	2
YGL078C	DBP3	-1.20789	0.125961	0.000152371	3
YCL010C	SGF29	-1.20773	0.569391	0.000152371	3
YGL089C	MF(ALPHA)2	-1.20263	0.188031	0.00189782	2
YOL103W	ITR2	-1.19806	0.381684	0.000165715	3
YPR074C	TKL1	-1.19653	0.252563	0.000169225	3
YBR294W	SUL1	-1.1953	0.298323	0.00198552	2
YMR175W-A		-1.19453	0.153538	0.000172809	3
YNL067W-B		-1.19216	0.126881	0.000176467	3
YOL119C	MCH4	-1.18633	0.50341	0.000184012	3
YJR146W		-1.18481	0.250937	0.000187902	3
YJR094W-A	RPL43B	-1.18201	0.317748	0.000191873	3
YNL014W	HEF3	-1.18144	0.615027	0.000191873	3
YOL006C	TOP1	-1.17796	0.109087	0.00220532	2
YOL005C	RPB11	-1.17766	0.180016	0.000195926	3
YIR001C	SGN1	-1.17757	0.134349	0.000195926	3
YLL045C	RPL8B	-1.17705	0.315636	0.000200063	3
YMR231W	PEP5	-1.1767	0.353601	0.000200063	3
YGL186C	TPN1	-1.16744	0.26936	0.000217487	3
YNR022C	MRPL50	-1.16224	0.535039	0.00022675	3
YLR363C	NMD4	-1.1569	0.626343	0.0002364	3
YGR040W	KSS1	-1.15343	0.689668	0.000241375	3
YJL006C	CTK2	-1.14791	0.310998	0.000251637	3
YPL051W	ARL3	-1.14724	0.204116	0.000256927	3
YGL088W		-1.13656	0.976321	0.000279207	3
YGR035W-A		-1.13651	0.639802	0.000279207	3
YDR538W	PAD1	-1.13597	0.171871	0.000279207	3
YMR272W-B		-1.13552	0.263916	0.000279207	3
YER132C	PMD1	-1.133	0.253412	0.000285068	3
YLR410W	VIP1	-1.13194	0.65419	0.00029105	3
YNL041C	COG6	-1.1315	0.489071	0.00029105	3
YDL236W	PHO13	-1.1313	0.294298	0.00292317	2
YGL141W	HUL5	-1.12756	0.21656	0.000297156	3
YJR058C	APS2	-1.12387	0.19436	0.000309749	3
YER177W	BMH1	-1.12168	0.45883	0.000316241	3
YNL290W	RFC3	-1.11843	1.94102	0.000322868	3
YIL158W		-1.11806	0.680881	0.000322868	3
YNL231C	PDR16	-1.11631	0.0932076	0.000329631	3
YGR054W		-1.11609	0.436153	0.000329631	3
YLR088W	GAA1	-1.11561	0.182456	0.00319189	2
YER137C		-1.11438	0.500378	0.000336534	3
YER108C		-1.11287	0.419826	0.000336534	3
YML021C	UNG1	-1.10923	0.429131	0.000350771	3
YNL307C	MCK1	-1.10641	0.135728	0.000358111	3
YDR239C		-1.10428	0.237822	0.000365603	3
YIL168W		-1.10407	0.176639	0.00343319	2
YER081W	SER3	-1.10268	1.09638	0.000365603	3
YHR136C	SPL2	-1.10026	0.620527	0.000373249	3
YIL132C	CSM2	-1.09736	0.688409	0.000389019	3
YIL015W	BAR1	-1.0972	0.0424795	0.00358598	2
YGR122W		-1.0921	0.274993	0.000405446	3
YER044C	ERG28	-1.0895	0.232455	0.000413915	3
YGL261C		-1.08351	0.28874	0.00043138	3
YGL004C	RPN14	-1.08236	0.286116	0.000440384	3
YDR421W	ARO80	-1.08173	0.584647	0.00391061	2
YNL064C	YDJ1	-1.08155	0.0474809	0.00391061	2
YDL114W		-1.08099	0.658515	0.000440384	3
YGL034C		-1.08005	0.281985	0.000440384	3
YML117W	NAB6	-1.07911	0.360109	0.000449574	3
YLL047W		-1.07502	0.578688	0.000458954	3
YOR338W		-1.0689	0.880488	0.000488268	3
YMR110C	HFD1	-1.06817	0.176052	0.000488268	3
YNR002C	ATO2	-1.06722	0.564702	0.000498446	3
YKR090W	PXL1	-1.06113	0.323369	0.000519434	3
YLR179C		-1.05954	0.449735	0.00444859	2
YDR203W		-1.05908	0.221389	0.000530254	3
YOR072W		-1.05874	0.371663	0.000530254	3
YOR010C	TIR2	-1.05812	1.57668	0.000530254	3
YML058C-A		-1.05806	0.0965094	0.000530254	3
YBR260C	RGD1	-1.05664	0.33707	0.000541296	3
YJL200C	ACO2	-1.055	0.227546	0.000541296	3
YHL003C	LAG1	-1.05387	0.714886	0.000552566	3
YBR299W	MAL32	-1.04936	0.366941	0.000575807	3
YJL077C	ICS3	-1.04712	0.393391	0.000587788	3
YEL009C	GCN4	-1.04595	0.261119	0.000587788	3
YGR270W	YTA7	-1.044	0.451636	0.00484407	2
YKR103W	NFT1	-1.04354	0.661031	0.000600016	3
YKR039W	GAP1	-1.04289	0.139227	0.000600016	3
YDR035W	ARO3	-1.04102	0.253943	0.000612495	3
YBR114W	RAD16	-1.04068	0.235556	0.000612495	3
YLR236C		-1.04049	0.217138	0.000612495	3
YJR096W		-1.03455	0.161007	0.000651493	3
YJR084W	CSN12	-1.03444	0.240525	0.000651493	3
YBR028C		-1.03206	0.883497	0.000665031	3
YEL033W	MTC7	-1.03204	1.07386	0.000665031	3
YGL214W		-1.03119	0.483552	0.000665031	3
YLR454W	FMP27	-1.02915	0.793275	0.000678847	3
YML024W	RPS17A	-1.02874	0.26216	0.000678847	3
YNR035C	ARC35	-1.02864	0.0607608	0.000678847	3
YBR174C		-1.02753	0.301898	0.000678847	3
YOR097C		-1.0232	0.186736	0.0054213	2
YDR302W	GPI11	-1.02292	0.370749	0.000707337	3
YKR034W	DAL80	-1.02179	0.643295	0.000722022	3
YBR145W	ADH5	-1.02176	0.135813	0.000722022	3
YLR121C	YPS3	-1.01862	0.0955993	0.000737009	3
YMR186W	HSC82	-1.01847	0.540972	0.000737009	3
YGL140C		-1.01658	0.391641	0.000752304	3
YJR137C	ECM17	-1.01515	0.223982	0.0056534	2
YKR092C	SRP40	-1.01458	0.416148	0.000767913	3
YOL045W	PSK2	-1.01408	0.201169	0.000767913	3
YEL007W		-1.01294	0.971997	0.000767913	3
YAL067C	SEO1	-1.01272	0.268223	0.000767913	3
YNL177C	MRPL22	-1.00951	0.254761	0.00589446	2
YDR056C		-1.00739	0.319954	0.000816686	3
YDR167W	TAF10	-1.00558	0.337267	0.000816686	3
YPR058W	YMC1	-1.00277	0.102402	0.000833614	3
YLR309C	IMH1	-1.00091	0.1214	0.00085089	3
YPL077C		-0.999796	0.274458	0.00086852	3
YDL012C		-0.998181	0.545998	0.00086852	3
YHR061C	GIC1	-0.997573	0.715563	0.00623033	2
YNL294C	RIM21	-0.997159	0.533457	0.00088651	3
YOL077C	BRX1	-0.993257	0.196679	0.000904869	3
YMR154C	RIM13	-0.99057	0.337881	0.000923603	3
YOR381W	FRE3	-0.989984	1.04299	0.00658335	2
YLR403W	SFP1	-0.988591	1.89671	0.00658335	2
YNL302C	RPS19B	-0.987666	0.924053	0.00658335	2
YMR209C		-0.986363	0.34493	0.000962229	3
YDL184C	RPL41A	-0.984896	1.09592	0.000982136	3
YDL074C	BRE1	-0.984857	0.416777	0.000982136	3
YNL215W	IES2	-0.98475	0.341627	0.000982136	3
YHR081W	LRP1	-0.983886	0.257334	0.000982136	3
YPR193C	HPA2	-0.973007	0.592103	0.00106591	3
YGR248W	SOL4	-0.972799	0.286067	0.00106591	3
YNL020C	ARK1	-0.972477	0.347906	0.00108794	3
YIL114C	POR2	-0.966712	0.444226	0.00113334	3
YHR199C		-0.965872	0.39768	0.00113334	3
YGL087C	MMS2	-0.9657	0.197144	0.00113334	3
YDL157C		-0.963922	0.314082	0.00115673	3
YER149C	PEA2	-0.963903	0.121432	0.00115673	3
YER027C	GAL83	-0.962891	0.585755	0.00115673	3
YJL046W		-0.961823	1.29964	0.0011806	3
YDR335W	MSN5	-0.961462	0.243914	0.00764858	2
YJR139C	HOM6	-0.960426	0.125281	0.0011806	3
YKR061W	KTR2	-0.959758	0.0867347	0.00775266	2
YDR072C	IPT1	-0.957453	0.11505	0.00122981	3
YNL320W		-0.957068	0.31227	0.00122981	3
YML112W	CTK3	-0.956776	0.289756	0.00122981	3
YGR070W	ROM1	-0.954781	0.550529	0.00796462	2
YLL051C	FRE6	-0.954121	0.357059	0.00125517	3
YKL183W	LOT5	-0.95319	0.37785	0.00125517	3
YMR283C	RIT1	-0.953172	0.567554	0.00125517	3
YKR082W	NUP133	-0.950008	0.0351848	0.00807252	2
YBR197C		-0.949142	0.534055	0.00130744	3
YNL083W	SAL1	-0.948951	0.360623	0.00130744	3
YAL055W	PEX22	-0.948352	0.317108	0.00130744	3
YPR172W		-0.947278	0.47099	0.00133437	3
YPR170C		-0.945927	0.686471	0.00133437	3
YJR076C	CDC11	-0.94407	0.137401	0.00136185	3
YPL225W		-0.942471	0.855553	0.00138988	3
YML108W		-0.941987	0.112102	0.00138988	3
YER131W	RPS26B	-0.937732	0.430235	0.00141849	3
YHR028C	DAP2	-0.937726	0.435731	0.00863174	2
YJR005W	APL1	-0.937708	0.365352	0.00141849	3
YBR083W	TEC1	-0.937496	0.0908725	0.00144766	3
YMR122C		-0.932927	0.0805555	0.00147743	3
YJR106W	ECM27	-0.929865	0.532711	0.00153879	3
YPR159C-A		-0.929596	0.362039	0.00153879	3
YPL127C	HHO1	-0.928086	0.739941	0.00153879	3
YGL170C	SPO74	-0.927582	0.21041	0.00153879	3
YIR030C	DCG1	-0.927185	1.46188	0.00157039	3
YKL174C	TPO5	-0.926482	1.18361	0.00157039	3
YNR059W	MNT4	-0.921543	0.435609	0.00163553	3
YLR053C		-0.921173	0.460068	0.00163553	3
YML004C	GLO1	-0.920475	0.335457	0.00163553	3
YOR034C-A		-0.920215	0.0297667	0.00947219	2
YNL156C	NSG2	-0.91923	0.18548	0.00959796	2
YDL174C	DLD1	-0.918226	0.314489	0.00166909	3
YJR149W		-0.917442	0.344895	0.00170332	3
YDR429C	TIF35	-0.916508	1.06431	0.00170332	3
YNL193W		-0.915697	0.155048	0.00170332	3
YGL197W	MDS3	-0.915075	0.293134	0.00170332	3
YLR040C		-0.914452	0.100269	0.00173823	3
YPR103W	PRE2	-0.91412	0.174728	0.00173823	3
YJL004C	SYS1	-0.910813	0.188047	0.00177385	3
YCR051W		-0.909124	0.385119	0.00181018	3
YOR030W	DFG16	-0.906566	0.443139	0.00184724	3
YER012W	PRE1	-0.903829	0.356832	0.00188504	3
YOR346W	REV1	-0.902024	0.51061	0.0019236	3
YJL216C		-0.900851	0.617014	0.0019236	3
YDL021W	GPM2	-0.900588	1.20761	0.0105202	2
YGR146C		-0.896031	0.342699	0.00200304	3
YLL015W	BPT1	-0.895876	0.186851	0.00200304	3
YOR386W	PHR1	-0.895642	0.690977	0.00200304	3
YNL085W	MKT1	-0.894883	0.0995257	0.00204395	3
YER072W	VTC1	-0.893132	0.573414	0.0109386	2
YML057W	CMP2	-0.892994	0.171729	0.00204395	3
YNL244C	SUI1	-0.892756	0.371348	0.0109386	2
YGL033W	HOP2	-0.892465	0.599197	0.00208568	3
YDR046C	BAP3	-0.890827	0.998686	0.00208568	3
YJR070C	LIA1	-0.890584	0.621831	0.00208568	3
YJL208C	NUC1	-0.890523	0.638187	0.00208568	3
YGR237C		-0.890109	0.373468	0.00208568	3
YGR045C		-0.888397	0.388106	0.0112256	2
YDR135C	YCF1	-0.887191	0.535086	0.00217164	3
YMR247C	RKR1	-0.885228	0.124464	0.00217164	3
YJL066C	MPM1	-0.885104	0.0675878	0.00217164	3
YGR007W	MUQ1	-0.884333	0.338948	0.0022159	3
YGR052W	FMP48	-0.883001	0.417847	0.0115191	2
YGL132W		-0.882508	0.28576	0.0022159	3
YPL026C	SKS1	-0.880974	0.202474	0.00226104	3
YER164W	CHD1	-0.880632	0.0339009	0.00226104	3
YLR125W		-0.879869	0.393445	0.00230708	3
YHL034C	SBP1	-0.875899	1.2993	0.00235403	3
YBR140C	IRA1	-0.875768	0.431317	0.00235403	3
YOR328W	PDR10	-0.872082	0.163096	0.00245073	3
YNL242W	ATG2	-0.869928	0.168658	0.00250051	3
YHR171W	ATG7	-0.868399	0.0989797	0.0124399	2
YNR062C		-0.866811	0.0960069	0.00255128	3
YJL022W		-0.863666	0.567421	0.00260304	3
YLR080W	EMP46	-0.863413	0.390356	0.00260304	3
YOL158C	ENB1	-0.863011	0.363213	0.00260304	3
YMR173W	DDR48	-0.862999	0.433981	0.00260304	3
YFR050C	PRE4	-0.86193	0.36196	0.00265582	3
YDL129W		-0.861162	0.606972	0.00265582	3
YLR460C		-0.857361	0.0824992	0.00276452	3
YGR110W		-0.85533	0.825575	0.00276452	3
YHR075C	PPE1	-0.85461	0.573384	0.00282046	3
YNL146W		-0.854313	0.581985	0.00282046	3
YAL016W	TPD3	-0.85402	0.614849	0.0134238	2
YDR164C	SEC1	-0.853448	0.177464	0.00282046	3
YGL042C		-0.853334	0.69128	0.00282046	3
YJR126C	VPS70	-0.850302	0.268868	0.00287751	3
YDL173W		-0.849546	0.552913	0.00293566	3
YBR063C		-0.847283	0.112394	0.00299495	3
YGL035C	MIG1	-0.844582	0.179584	0.0141163	2
YLR346C		-0.844344	0.213089	0.0030554	3
YBR034C	HMT1	-0.843931	0.103522	0.0141163	2
YLR373C	VID22	-0.843929	0.257339	0.0030554	3
YPR059C		-0.842465	0.256548	0.00311702	3
YLR134W	PDC5	-0.841859	0.365038	0.00311702	3
YPL004C	LSP1	-0.840728	0.730764	0.00311702	3
YKR089C	TGL4	-0.840416	0.183149	0.00311702	3
YJR111C		-0.839946	0.384882	0.00317984	3
YPR194C	OPT2	-0.839681	0.290572	0.0144739	2
YPL064C	CWC27	-0.839346	0.0268335	0.00317984	3
YPL269W	KAR9	-0.838019	0.267824	0.00317984	3
YLR282C		-0.837382	0.437901	0.00324388	3
YPR196W		-0.837009	0.505193	0.00324388	3
YIR039C	YPS6	-0.833585	0.294678	0.0148392	2
YML098W	TAF13	-0.833192	0.237228	0.00330916	3
YBR104W	YMC2	-0.832434	0.622538	0.0150248	2
YLR037C	DAN2	-0.829655	0.345803	0.00344353	3
YPL052W	OAZ1	-0.827424	0.624079	0.00351266	3
YJR103W	URA8	-0.827028	0.513219	0.00351266	3
YNL194C		-0.8248	0.474815	0.00358313	3
YGL006W	PMC1	-0.824271	0.344718	0.00358313	3
YLR344W	RPL26A	-0.823308	0.251297	0.00358313	3
YKR036C	CAF4	-0.822103	0.201363	0.00365495	3
YNL074C	MLF3	-0.820113	0.197205	0.0157872	2
YGL258W	VEL1	-0.818987	0.491779	0.0159828	2
YML020W		-0.813862	0.385671	0.00387879	3
YEL040W	UTR2	-0.81349	0.547853	0.0163803	2
YDL179W	PCL9	-0.812686	0.202958	0.00387879	3
YER110C	KAP123	-0.809905	0.478667	0.0167861	2
YPL198W	RPL7B	-0.808199	0.450735	0.00403524	3
YBR020W	GAL1	-0.804435	0.169463	0.00419771	3
YOR005C	DNL4	-0.801725	0.819672	0.00428127	3
YPR073C	LTP1	-0.801396	0.273366	0.00428127	3
YHR117W	TOM71	-0.800571	0.940944	0.00428127	3
YER134C		-0.800563	0.574357	0.00428127	3
YNL065W	AQR1	-0.799549	0.269149	0.00436641	3
YMR142C	RPL13B	-0.796678	0.306712	0.0178381	2
YGR071C		-0.796486	0.108327	0.00445316	3
YDR026C		-0.794797	0.131803	0.00454155	3
YBR128C	ATG14	-0.794281	0.427913	0.00454155	3
YCR065W	HCM1	-0.794104	0.294048	0.00454155	3
YMR129W	POM152	-0.7941	0.432261	0.00454155	3
YJL193W		-0.792924	0.477225	0.018055	2
YPR032W	SRO7	-0.792306	1.23303	0.0046316	3
YBR091C	MRS5	-0.792295	0.374166	0.0046316	3
YDL183C		-0.791507	0.885097	0.0046316	3
YBR025C	OLA1	-0.791446	0.338665	0.0046316	3
YGR058W	PEF1	-0.791257	0.424804	0.0046316	3
YNL209W	SSB2	-0.789748	0.186008	0.00472336	3
YIL040W	APQ12	-0.789379	0.179328	0.0184956	2
YML059C	NTE1	-0.787915	0.481451	0.00472336	3
YDR126W	SWF1	-0.787103	0.266312	0.00481683	3
YFL007W	BLM10	-0.787024	0.295828	0.00481683	3
YHR157W	REC104	-0.786682	0.431406	0.00481683	3
YOL080C	REX4	-0.78426	0.363011	0.00491206	3
YDL136W	RPL35B	-0.783975	0.560335	0.00491206	3
YPL203W	TPK2	-0.781638	0.82277	0.00500907	3
YOR170W		-0.780778	0.0439782	0.0191733	2
YDL112W	TRM3	-0.778592	0.382017	0.00510789	3
YOR178C	GAC1	-0.778257	0.397364	0.00510789	3
YGL104C	VPS73	-0.777947	1.13468	0.00510789	3
YJR128W		-0.777649	0.588055	0.00510789	3
YPR195C		-0.777209	0.203414	0.00520856	3
YDR025W	RPS11A	-0.773181	0.139059	0.0053111	3
YER056C-A	RPL34A	-0.772231	0.153419	0.00541555	3
YLR350W	ORM2	-0.772195	0.314372	0.00541555	3
YHR179W	OYE2	-0.772168	0.192305	0.0201091	2
YKL076C	PSY1	-0.77074	0.301235	0.00541555	3
YPL080C		-0.769894	1.01737	0.00552193	3
YGR080W	TWF1	-0.767503	0.316407	0.0203489	2
YBR143C	SUP45	-0.766481	0.189577	0.00563028	3
YGR018C		-0.764502	0.436978	0.00574063	3
YGL059W	PKP2	-0.762717	0.798622	0.00574063	3
YBL063W	KIP1	-0.76109	0.197687	0.00585302	3
YLR452C	SST2	-0.760721	1.09554	0.00585302	3
YIL062C	ARC15	-0.760001	0.109769	0.00585302	3
YLR083C	EMP70	-0.759734	0.26344	0.00596748	3
YPL161C	BEM4	-0.757075	0.336104	0.00608403	3
YER183C	FAU1	-0.756061	0.133997	0.00608403	3
YPL033C	SRL4	-0.755904	0.226355	0.00608403	3
YGR053C		-0.754151	0.365933	0.00620272	3
YMR139W	RIM11	-0.75411	0.335789	0.0218384	2
YOR234C	RPL33B	-0.753885	0.409572	0.00620272	3
YLR342W	FKS1	-0.753787	0.405108	0.00620272	3
YMR147W		-0.751723	0.353619	0.00632358	3
YIR002C	MPH1	-0.75138	0.0535491	0.00632358	3
YNL250W	RAD50	-0.750498	1.53237	0.0220953	2
YBR200W	BEM1	-0.750086	0.251512	0.0220953	2
YJL060W	BNA3	-0.748635	0.336363	0.00644665	3
YDL194W	SNF3	-0.748287	0.0400936	0.00644665	3
YJL082W	IML2	-0.747031	0.278272	0.00657195	3
YLR450W	HMG2	-0.741889	0.168085	0.00682943	3
YMR180C	CTL1	-0.74042	0.324123	0.00682943	3
YBL042C	FUI1	-0.738822	0.123578	0.00696168	3
YPR198W	SGE1	-0.738051	0.921134	0.00696168	3
YMR223W	UBP8	-0.737959	0.186293	0.00696168	3
YHR135C	YCK1	-0.736886	0.177819	0.00709631	3
YJL065C	DLS1	-0.736661	0.209316	0.00709631	3
YAL035W	FUN12	-0.735954	0.0966652	0.00709631	3
YJR044C	VPS55	-0.735661	0.261355	0.00709631	3
YDR140W	MTQ2	-0.73467	0.421698	0.00723336	3
YDR161W		-0.733792	0.520194	0.00723336	3
YPR158W	CUR1	-0.732271	0.340222	0.00737288	3
YDR423C	CAD1	-0.732177	0.505235	0.00737288	3
YDR420W	HKR1	-0.730753	0.133203	0.00737288	3
YLR315W	NKP2	-0.728666	0.423945	0.0075149	3
YNL226W		-0.727684	0.646289	0.0075149	3
YHR121W	LSM12	-0.727148	0.372763	0.00765946	3
YDL188C	PPH22	-0.726658	0.380262	0.00765946	3
YNL289W	PCL1	-0.725696	0.231477	0.00765946	3
YLR229C	CDC42	-0.725337	0.225439	0.00765946	3
YJL186W	MNN5	-0.724449	0.544059	0.00780659	3
YMR143W	RPS16A	-0.72379	0.467533	0.00780659	3
YDL110C	TMA17	-0.723593	0.404676	0.00780659	3
YOR082C		-0.723085	0.320433	0.00780659	3
YBR085C-A		-0.72239	0.229292	0.00795635	3
YBR144C		-0.722383	1.03628	0.00795635	3
YMR195W	ICY1	-0.721984	0.446989	0.0253766	2
YPL046C	ELC1	-0.720872	0.36301	0.0253766	2
YAR029W		-0.719876	0.453851	0.00810876	3
YNR064C		-0.719726	0.608615	0.00810876	3
YPR201W	ARR3	-0.718573	0.461691	0.00810876	3
YJL014W	CCT3	-0.718501	0.264277	0.00810876	3
YHR187W	IKI1	-0.7178	0.72881	0.00810876	3
YNL255C	GIS2	-0.717597	0.272895	0.00810876	3
YCL040W	GLK1	-0.717557	0.738139	0.00810876	3
YER118C	SHO1	-0.717215	0.192124	0.00826388	3
YML053C		-0.717127	0.348305	0.00826388	3
YOR164C		-0.716634	0.376355	0.00826388	3
YDR477W	SNF1	-0.714109	0.0186092	0.00842174	3
YKL133C		-0.713536	0.51291	0.0262565	2
YCR035C	RRP43	-0.713267	0.627825	0.00842174	3
YPR128C	ANT1	-0.71205	0.381489	0.00858238	3
YLR034C	SMF3	-0.711852	0.504182	0.00858238	3
YBR193C	MED8	-0.709902	0.146476	0.00874584	3
YOR272W	YTM1	-0.709759	0.150642	0.00874584	3
YML047C	PRM6	-0.708833	1.29544	0.00874584	3
YOR275C	RIM20	-0.705382	0.796896	0.00891218	3
YDR444W		-0.705242	0.352895	0.00891218	3
YDL078C	MDH3	-0.704939	1.25664	0.00908142	3
YJR115W		-0.704563	0.216608	0.00908142	3
YNL278W	CAF120	-0.704352	0.596724	0.00908142	3
YMR290C	HAS1	-0.703595	0.564892	0.00908142	3
YHR022C		-0.701667	1.18688	0.00925362	3
YGL209W	MIG2	-0.701401	0.917107	0.00925362	3
YPR093C	ASR1	-0.700695	0.0516764	0.00925362	3
YER002W	NOP16	-0.698758	0.311174	0.00942882	3
YKR063C	LAS1	-0.698643	0.113444	0.00942882	3
YLL006W-A		-0.698641	0.432592	0.00942882	3
YNR009W	NRM1	-0.697583	0.352191	0.00942882	3
YPL232W	SSO1	-0.69606	0.502215	0.00960706	3
YLR432W	IMD3	-0.695735	0.252616	0.00960706	3
YPL038W	MET31	-0.695646	0.362886	0.00960706	3
YHR035W		-0.695499	0.740704	0.00960706	3
YBR113W		-0.695172	0.295271	0.00960706	3
YPR108W-A		-0.69496	0.0171112	0.00978839	3
YBR243C	ALG7	-0.694476	0.407276	0.00978839	3
YDR530C	APA2	-0.694376	0.540382	0.0287249	2
YNL051W	COG5	-0.6941	0.223373	0.00978839	3
YNL277W	MET2	-0.692989	0.39173	0.00978839	3
YDR170C	SEC7	-0.692548	0.537978	0.00978839	3
YMR013W-A		-0.692389	0.487846	0.00997285	3
YMR138W	CIN4	-0.692282	0.454866	0.00997285	3
YGL208W	SIP2	-0.692118	0.707168	0.00997285	3
YDL119C		-0.691427	0.268404	0.00997285	3
YAR031W	PRM9	-0.689303	0.0928841	0.0101605	3
YBR189W	RPS9B	-0.687012	0.411385	0.0103514	3
YMR194W	RPL36A	-0.685661	0.242409	0.0103514	3
YLR168C		-0.685323	0.488559	0.0103514	3
YBR224W		-0.684846	0.426553	0.0105455	3
YGL173C	KEM1	-0.68379	0.435696	0.0105455	3
YBR026C	ETR1	-0.683178	0.925392	0.0105455	3
YOR172W	YRM1	-0.682965	0.22202	0.0105455	3
YJR130C	STR2	-0.682178	0.184376	0.0107429	3
YNL305C		-0.68209	0.0421794	0.0303609	2
YPL066W		-0.681119	0.133089	0.0107429	3
YPL067C		-0.67896	0.371209	0.0109438	3
YMR038C	CCS1	-0.67827	0.347151	0.0109438	3
YHR001W-A	QCR10	-0.677632	0.483099	0.0109438	3
YAL061W	BDH2	-0.677422	0.399345	0.011148	3
YDL242W		-0.675995	0.253516	0.011148	3
YER001W	MNN1	-0.675678	1.19811	0.011148	3
YER035W	EDC2	-0.675436	1.54808	0.011148	3
YKR104W		-0.674724	0.396182	0.0113557	3
YGR105W	VMA21	-0.673609	1.02996	0.0313781	2
YLR398C	SKI2	-0.673583	0.380708	0.0113557	3
YDR093W	DNF2	-0.673513	0.198888	0.0113557	3
YDR453C	TSA2	-0.672571	0.306019	0.0113557	3
YLR239C	LIP2	-0.671435	0.538477	0.0115669	3
YLR394W	CST9	-0.671278	0.457085	0.0115669	3
YKL052C	ASK1	-0.670728	0.229465	0.0115669	3
YLR283W		-0.670023	0.639821	0.0115669	3
YLL019C	KNS1	-0.669948	0.13675	0.0117817	3
YDL082W	RPL13A	-0.668568	0.606871	0.0117817	3
YPL230W	USV1	-0.666771	0.478708	0.0120001	3
YDR183W	PLP1	-0.666764	0.477139	0.0324226	2
YOR114W		-0.665524	0.133284	0.0120001	3
YPL248C	GAL4	-0.665001	0.408858	0.0324226	2
YDL130W	RPP1B	-0.664517	0.0968218	0.0122221	3
YGL166W	CUP2	-0.663621	0.309945	0.0122221	3
YBL071C		-0.663445	0.26066	0.0122221	3
YER096W	SHC1	-0.66318	0.100202	0.0122221	3
YDR246W-A		-0.662037	0.516727	0.0124479	3
YLR406C	RPL31B	-0.661562	0.640851	0.0124479	3
YJL106W	IME2	-0.660242	0.159654	0.0331343	2
YFR039C		-0.660112	0.501362	0.0124479	3
YJL088W	ARG3	-0.659223	6.02963e-05	0.0334948	2
YCR016W		-0.659068	0.383234	0.0126774	3
YGL016W	KAP122	-0.658821	0.207176	0.0126774	3
YLR023C	IZH3	-0.658764	0.585267	0.0126774	3
YBR213W	MET8	-0.658279	0.739892	0.0126774	3
YOL152W	FRE7	-0.658156	0.25021	0.0126774	3
YNL093W	YPT53	-0.656959	0.886327	0.0129107	3
YDR474C		-0.656831	0.833387	0.0129107	3
YGL211W	NCS6	-0.656712	0.795312	0.0129107	3
YKL081W	TEF4	-0.654528	0.449358	0.0342253	2
YOR298W	MUM3	-0.654322	0.480687	0.0131479	3
YDR071C	PAA1	-0.652447	0.823132	0.0133891	3
YJL142C	IRC9	-0.651881	0.532849	0.0133891	3
YGR196C	FYV8	-0.651419	0.17899	0.0133891	3
YGL058W	RAD6	-0.650939	0.360827	0.0133891	3
YDR110W	FOB1	-0.650607	0.124814	0.0133891	3
YDL229W	SSB1	-0.650173	0.102754	0.0133891	3
YOR230W	WTM1	-0.64891	0.49495	0.0136342	3
YBR184W		-0.648874	0.50097	0.0136342	3
YMR072W	ABF2	-0.647678	0.354383	0.0349686	2
YPL054W	LEE1	-0.647358	0.560874	0.0138833	3
YAL028W	FRT2	-0.647229	0.384565	0.0138833	3
YDR501W	PLM2	-0.644843	0.476942	0.0141365	3
YLR049C		-0.643884	0.219443	0.0141365	3
YDL118W		-0.64319	0.470207	0.0141365	3
YDR092W	UBC13	-0.642875	0.661033	0.0141365	3
YLL017W		-0.640973	0.290062	0.0143938	3
YBL102W	SFT2	-0.640869	0.371579	0.0143938	3
YNL114C		-0.640568	0.0198026	0.0361077	2
YDR274C		-0.639819	0.134555	0.0364939	2
YAR008W	SEN34	-0.638582	0.145382	0.0146554	3
YLR074C	BUD20	-0.637563	1.61827	0.0146554	3
YPL014W		-0.636249	0.130742	0.0149212	3
YML042W	CAT2	-0.635319	0.754833	0.0149212	3
YJL149W		-0.634822	0.593505	0.0151912	3
YGL160W		-0.633804	0.528384	0.0151912	3
YPL102C		-0.633023	0.977725	0.0151912	3
YGR017W		-0.632455	0.171802	0.0154657	3
YLL024C	SSA2	-0.631397	0.164462	0.0154657	3
YER174C	GRX4	-0.631217	0.365854	0.0154657	3
YLL042C	ATG10	-0.631201	0.746968	0.0154657	3
YMR294W-A		-0.631043	0.252466	0.0154657	3
YBR057C	MUM2	-0.630962	0.651057	0.0154657	3
YGL117W		-0.630704	0.580577	0.0154657	3
YNR043W	MVD1	-0.628811	0.294985	0.0157445	3
YOL101C	IZH4	-0.628482	0.486556	0.0157445	3
YMR304C-A		-0.627981	0.310067	0.0157445	3
YMR244W		-0.627608	0.176156	0.0157445	3
YML058W	SML1	-0.62706	0.457674	0.0160278	3
YHL032C	GUT1	-0.626649	0.185368	0.0160278	3
YGR250C		-0.626376	0.199533	0.0160278	3
YLR433C	CNA1	-0.626182	0.32676	0.0160278	3
YMR199W	CLN1	-0.626174	0.339079	0.0160278	3
YMR040W	YET2	-0.626111	0.549363	0.0160278	3
YLR177W		-0.626106	0.237789	0.0160278	3
YBR207W	FTH1	-0.624994	0.571665	0.0163157	3
YLR376C	PSY3	-0.624699	0.12	0.0163157	3
YBR181C	RPS6B	-0.624652	0.878416	0.0163157	3
YOR342C		-0.624313	0.173238	0.0163157	3
YKR025W	RPC37	-0.623284	0.892512	0.0163157	3
YHR150W	PEX28	-0.622606	0.801143	0.0163157	3
YGL026C	TRP5	-0.621973	0.219157	0.0166081	3
YNL176C		-0.62045	0.174293	0.0392915	2
YBR156C	SLI15	-0.620302	0.652626	0.0166081	3
YLR456W		-0.619972	0.232937	0.0169052	3
YOL043C	NTG2	-0.61922	0.0851604	0.0169052	3
YDL026W		-0.617051	0.694264	0.0172069	3
YPR155C	NCA2	-0.616942	0.249353	0.0172069	3
YDR458C	HEH2	-0.616695	0.301769	0.0172069	3
YER019W	ISC1	-0.616026	0.751436	0.0172069	3
YEL067C		-0.614091	0.482712	0.0175135	3
YCL024W	KCC4	-0.613693	1.12048	0.0405421	2
YPL119C-A		-0.613537	0.320007	0.0175135	3
YER067W		-0.613166	1.14214	0.0175135	3
YHL017W		-0.612289	0.0817916	0.0178248	3
YJL206C		-0.612238	0.286476	0.0178248	3
YMR017W	SPO20	-0.611717	0.331258	0.0178248	3
YHR046C	INM1	-0.610918	0.612053	0.0178248	3
YER089C	PTC2	-0.610718	0.277692	0.0178248	3
YCL004W	PGS1	-0.609952	0.369527	0.018141	3
YGL096W	TOS8	-0.606691	0.0794081	0.0184622	3
YDR207C	UME6	-0.606498	0.310058	0.0184622	3
YPL088W		-0.606486	1.03189	0.0184622	3
YGR046W	TAM41	-0.605904	0.436988	0.0184622	3
YGR288W	MAL13	-0.605577	0.0742909	0.0418246	2
YER074W	RPS24A	-0.605548	0.215023	0.0184622	3
YBR271W		-0.605369	0.538482	0.0184622	3
YLR285W	NNT1	-0.60465	0.758437	0.0187884	3
YDR220C		-0.604269	0.0570333	0.0187884	3
YPR174C		-0.603934	0.257619	0.0187884	3
YPL032C	SVL3	-0.603638	0.204963	0.0187884	3
YPR140W	TAZ1	-0.603344	0.590168	0.0187884	3
YLR090W	XDJ1	-0.600969	0.14947	0.0191196	3
YDR517W	GRH1	-0.600445	0.930679	0.0191196	3
YHR209W	CRG1	-0.599565	0.315016	0.019456	3
YLR164W		-0.599385	0.237983	0.019456	3
YKL221W	MCH2	-0.59923	0.122317	0.0431397	2
YLR311C		-0.598771	0.247905	0.019456	3
YNL230C	ELA1	-0.598194	0.160583	0.019456	3
YKL019W	RAM2	-0.59805	0.108709	0.019456	3
YDR284C	DPP1	-0.59757	0.0917059	0.0431397	2
YER064C		-0.597332	0.0420389	0.0197975	3
YHL036W	MUP3	-0.596868	0.82779	0.0197975	3
YJL055W		-0.595735	0.36873	0.0197975	3
YLR190W	MMR1	-0.595609	0.491373	0.0197975	3
YMR123W	PKR1	-0.59543	0.520619	0.0197975	3
YIR028W	DAL4	-0.595154	0.172161	0.0435855	2
YGR158C	MTR3	-0.59513	0.307016	0.0197975	3
YOL083W		-0.5951	0.307272	0.0197975	3
YHR087W	RTC3	-0.59487	0.14009	0.0440351	2
YKL136W		-0.594318	1.49295	0.0201443	3
YMR160W		-0.593052	0.294344	0.0201443	3
YGL124C	MON1	-0.592279	0.593938	0.0204964	3
YIL124W	AYR1	-0.591529	0.201798	0.0204964	3
YDL053C	PBP4	-0.591119	0.696383	0.0204964	3
YBL073W		-0.590322	0.830771	0.0204964	3
YKL067W	YNK1	-0.59028	0.225073	0.0204964	3
YMR230W-A		-0.588212	0.135812	0.0208539	3
YPL072W	UBP16	-0.587124	0.151078	0.0212168	3
YHL043W	ECM34	-0.585373	0.444954	0.0212168	3
YFR020W		-0.585314	0.0896796	0.0454065	2
YLR082C	SRL2	-0.584495	0.24488	0.0215852	3
YNL328C	MDJ2	-0.583868	0.225449	0.0215852	3
YKL060C	FBA1	-0.583508	0.265011	0.0215852	3
YFL022C	FRS2	-0.582789	0.234309	0.0215852	3
YOL109W	ZEO1	-0.582628	0.131593	0.0215852	3
YGL005C	COG7	-0.58233	0.417355	0.0219592	3
YLR095C	IOC2	-0.582129	0.105628	0.0219592	3
YMR086W		-0.582047	0.0656078	0.0463402	2
YDR450W	RPS18A	-0.58106	0.36431	0.0219592	3
YBR082C	UBC4	-0.580628	0.270785	0.0219592	3
YAL022C	FUN26	-0.579704	0.463814	0.0223388	3
YNL111C	CYB5	-0.579058	0.0676089	0.0223388	3
YOR001W	RRP6	-0.57643	0.655289	0.0227241	3
YMR162C	DNF3	-0.576186	0.153706	0.0227241	3
YNL298W	CLA4	-0.575201	0.142406	0.0472897	2
YBR186W	PCH2	-0.574548	0.514706	0.0231152	3
YGR273C		-0.574232	0.263126	0.0231152	3
YGL041C		-0.572363	0.119805	0.0235121	3
YGR213C	RTA1	-0.572316	0.949085	0.0235121	3
YJR015W		-0.571893	0.60029	0.0235121	3
YER152C		-0.571562	0.401864	0.0235121	3
YGR141W	VPS62	-0.570976	0.223764	0.0235121	3
YLL052C	AQY2	-0.570644	0.457294	0.0235121	3
YMR193C-A		-0.57064	0.443713	0.0235121	3
YGR148C	RPL24B	-0.569634	0.169464	0.0239149	3
YDR507C	GIN4	-0.569261	0.4167	0.0239149	3
YPR001W	CIT3	-0.568495	0.658642	0.0239149	3
YMR193W	MRPL24	-0.568468	0.597813	0.0239149	3
YDR088C	SLU7	-0.567768	0.325115	0.0239149	3
YAL004W		-0.567216	0.430862	0.0243236	3
YGR139W		-0.567064	0.298674	0.0243236	3
YPL140C	MKK2	-0.566594	0.0968843	0.0243236	3
YER005W	YND1	-0.565832	0.231473	0.0243236	3
YJR108W	ABM1	-0.565283	0.260499	0.0243236	3
YOR129C	AFI1	-0.564458	0.529157	0.0247384	3
YIL066C	RNR3	-0.564155	0.300699	0.0247384	3
YMR295C		-0.563015	0.233778	0.0247384	3
YHL041W		-0.562724	0.260369	0.0247384	3
YMR119W	ASI1	-0.561314	0.115776	0.0251593	3
YHR195W	NVJ1	-0.561027	0.415209	0.0251593	3
YNL266W		-0.560867	0.772451	0.0251593	3
YCL025C	AGP1	-0.559934	0.601618	0.0255863	3
YOL011W	PLB3	-0.559913	0.503087	0.0255863	3
YLL025W	PAU17	-0.559598	0.257637	0.0255863	3
YMR310C		-0.559347	0.163321	0.0255863	3
YKL130C	SHE2	-0.558998	0.168607	0.0255863	3
YJR140C	HIR3	-0.558655	0.22694	0.0255863	3
YLR122C		-0.558319	0.333063	0.0255863	3
YGR217W	CCH1	-0.557251	0.632443	0.0260196	3
YFL038C	YPT1	-0.556848	0.256989	0.0260196	3
YDR307W		-0.556676	0.198719	0.051253	2
YHL044W		-0.556434	0.497736	0.0260196	3
YGR235C		-0.555654	0.506719	0.051253	2
YOR076C	SKI7	-0.55496	0.157493	0.0264591	3
YOR360C	PDE2	-0.554908	0.33465	0.0264591	3
YGL003C	CDH1	-0.554508	0.478698	0.0517678	2
YGL178W	MPT5	-0.55382	0.251741	0.0264591	3
YBR203W	COS111	-0.553657	0.27181	0.0264591	3
YOL075C		-0.553198	0.332012	0.0264591	3
YLR255C		-0.551968	0.198697	0.0269051	3
YOR088W		-0.551531	0.0654279	0.0269051	3
YMR232W	FUS2	-0.551402	0.241835	0.0269051	3
YHR004C	NEM1	-0.550933	0.623805	0.0269051	3
YGL040C	HEM2	-0.550131	0.11971	0.0269051	3
YER180C	ISC10	-0.549259	0.209729	0.0273574	3
YJR093C	FIP1	-0.549121	0.0553012	0.0273574	3
YGL011C	SCL1	-0.547565	0.0523537	0.0273574	3
YLR143W		-0.546447	0.811543	0.0278163	3
YHR104W	GRE3	-0.545717	0.357519	0.0278163	3
YOR194C	TOA1	-0.544862	0.229837	0.0282818	3
YKL220C	FRE2	-0.543674	0.309527	0.0282818	3
YDR029W		-0.542258	0.614776	0.0287539	3
YLR461W	PAU4	-0.542067	0.491431	0.0287539	3
YHL016C	DUR3	-0.541587	0.407311	0.0287539	3
YHL006C	SHU1	-0.540526	0.933971	0.0287539	3
YHL027W	RIM101	-0.540365	0.101014	0.0287539	3
YJR019C	TES1	-0.540079	0.416835	0.0287539	3
YJR021C	REC107	-0.538981	0.510715	0.0292328	3
YDR146C	SWI5	-0.538783	0.698519	0.0292328	3
YPL261C		-0.538557	0.392354	0.0292328	3
YKL022C	CDC16	-0.538415	0.158999	0.0292328	3
YMR164C	MSS11	-0.537698	0.122457	0.0292328	3
YOR347C	PYK2	-0.537513	0.0448609	0.0549527	2
YER119C	AVT6	-0.536868	0.0749445	0.0297184	3
YLR178C	TFS1	-0.535663	0.345127	0.0297184	3
YLR228C	ECM22	-0.534267	0.177844	0.030211	3
YPL138C	SPP1	-0.533391	0.154022	0.030211	3
YBR209W		-0.533341	0.427118	0.0560525	2
YMR297W	PRC1	-0.533198	0.16377	0.030211	3
YDR368W	YPR1	-0.532735	0.328503	0.030211	3
YMR187C		-0.531882	0.464247	0.0307105	3
YOL057W		-0.531864	0.158995	0.0307105	3
YNL291C	MID1	-0.531687	0.06672	0.0566099	2
YAL042W	ERV46	-0.531492	0.250958	0.0307105	3
YHL001W	RPL14B	-0.530754	0.196852	0.0307105	3
YLR097C	HRT3	-0.529471	0.0348206	0.031217	3
YOR126C	IAH1	-0.52869	0.0269923	0.031217	3
YDL187C		-0.528471	0.304761	0.031217	3
YGR238C	KEL2	-0.528433	0.272558	0.031217	3
YPL095C	EEB1	-0.528119	0.147505	0.031217	3
YGR205W		-0.527005	0.117189	0.0317306	3
YLR331C	JIP3	-0.526635	0.134418	0.0317306	3
YAR040C		-0.526208	0.456237	0.0317306	3
YNL205C		-0.52616	0.324545	0.0317306	3
YMR005W	TAF4	-0.525821	0.424591	0.0317306	3
YMR140W	SIP5	-0.525755	0.249456	0.0317306	3
YDL132W	CDC53	-0.525121	0.201841	0.0317306	3
YML016C	PPZ1	-0.524346	0.292483	0.0322514	3
YAL056W	GPB2	-0.524291	0.188504	0.0322514	3
YKL190W	CNB1	-0.52411	0.358261	0.0322514	3
YCL026C-A	FRM2	-0.523492	0.272316	0.0322514	3
YPL139C	UME1	-0.523349	0.582518	0.0322514	3
YKL079W	SMY1	-0.52262	0.134722	0.0322514	3
YGL162W	SUT1	-0.521805	0.174491	0.0327794	3
YNL097C-A		-0.521183	0.349183	0.0327794	3
YOR179C	SYC1	-0.52076	0.250764	0.0327794	3
YAR050W	FLO1	-0.517896	0.442552	0.0333148	3
YML050W		-0.517722	0.336423	0.0333148	3
YDR133C		-0.517314	0.288348	0.0338575	3
YHL046C		-0.517214	0.286308	0.0338575	3
YPR106W	ISR1	-0.515949	0.210453	0.0338575	3
YJR033C	RAV1	-0.512851	0.353285	0.0344078	3
YDR209C		-0.512744	0.445962	0.0344078	3
YHR113W		-0.512649	0.287752	0.0344078	3
YKL030W		-0.512532	0.141873	0.0344078	3
YJR090C	GRR1	-0.512507	0.203757	0.0344078	3
YDL124W		-0.511715	0.0828703	0.0349656	3
YLR326W		-0.51103	0.245231	0.0349656	3
YNL281W	HCH1	-0.510166	0.405401	0.0349656	3
YMR163C	INP2	-0.509226	0.196596	0.0355311	3
YGR069W		-0.508528	0.177814	0.0355311	3
YAL019W	FUN30	-0.50844	0.160879	0.0355311	3
YPL155C	KIP2	-0.508142	0.73237	0.0355311	3
YOL032W	OPI10	-0.507422	0.142993	0.0361044	3
YHR013C	ARD1	-0.506552	0.266092	0.0361044	3
YHR109W	CTM1	-0.506085	0.415994	0.0361044	3
YLR046C		-0.50339	0.107832	0.0366854	3
YGL133W	ITC1	-0.50178	0.383191	0.0372744	3
YAL015C	NTG1	-0.501434	0.0686019	0.0372744	3
YCR019W	MAK32	-0.500354	0.138015	0.0372744	3
YML117W-A		-0.500326	0.210657	0.0372744	3
YER173W	RAD24	-0.500168	0.120917	0.0372744	3
YOR012W		-0.499845	0.148983	0.0378713	3
YNL224C	SQS1	-0.499802	0.193257	0.0378713	3
YER080W	AIM9	-0.499313	0.276652	0.0378713	3
YPL055C	LGE1	-0.499099	0.231032	0.0378713	3
YLR043C	TRX1	-0.49896	0.15008	0.064353	2
YBL037W	APL3	-0.498336	0.0753603	0.0378713	3
YOL128C	YGK3	-0.49815	0.0472524	0.0378713	3
YDR528W	HLR1	-0.497999	0.546726	0.0378713	3
YNL297C	MON2	-0.497744	0.180784	0.0378713	3
YGL210W	YPT32	-0.49756	0.351987	0.064353	2
YPR014C		-0.496958	0.115934	0.0384763	3
YPL103C	FMP30	-0.496763	0.557737	0.0384763	3
YFR002W	NIC96	-0.495998	0.328462	0.0384763	3
YPL197C		-0.495083	0.183544	0.0384763	3
YCR001W		-0.494842	0.229133	0.0390895	3
YLR390W	ECM19	-0.494814	0.220249	0.0390895	3
YGL138C		-0.494082	0.470052	0.0390895	3
YDL079C	MRK1	-0.493861	0.640785	0.0390895	3
YLR292C	SEC72	-0.493054	0.291898	0.0656346	2
YPR039W		-0.492553	0.451177	0.0390895	3
YAR047C		-0.492532	0.4177	0.0390895	3
YIL116W	HIS5	-0.491945	0.152183	0.0662855	2
YGL002W	ERP6	-0.491628	0.32328	0.039711	3
YMR006C	PLB2	-0.49038	0.323994	0.039711	3
YCR069W	CPR4	-0.490355	0.475224	0.039711	3
YFL019C		-0.490307	0.574336	0.039711	3
YGR189C	CRH1	-0.489935	0.217068	0.0403408	3
YOR253W	NAT5	-0.48978	0.159409	0.0403408	3
YMR271C	URA10	-0.489666	0.0838356	0.0403408	3
YLR443W	ECM7	-0.489369	0.654587	0.0403408	3
YIR005W	IST3	-0.489159	0.379814	0.0403408	3
YGL216W	KIP3	-0.488251	0.100509	0.0403408	3
YGL224C	SDT1	-0.487781	0.255895	0.0403408	3
YCR073W-A	SOL2	-0.487655	0.303631	0.0403408	3
YOR235W	IRC13	-0.486402	0.231865	0.040979	3
YJR147W	HMS2	-0.485914	0.249775	0.040979	3
YKL207W		-0.485348	0.0929391	0.067608	2
YAL005C	SSA1	-0.484751	0.130343	0.0416258	3
YBR267W	REI1	-0.484549	1.5973	0.0416258	3
YJL162C	JJJ2	-0.48453	0.815905	0.0416258	3
YJR068W	RFC2	-0.481648	0.267375	0.0422812	3
YDR107C	TMN2	-0.480851	0.790375	0.0422812	3
YNL116W	DMA2	-0.480335	0.282677	0.0422812	3
YMR229C	RRP5	-0.480099	0.483444	0.0422812	3
YNL248C	RPA49	-0.479502	0.850757	0.0429454	3
YGR111W		-0.479405	0.306087	0.0429454	3
YOR157C	PUP1	-0.47939	0.184733	0.0429454	3
YIL031W	ULP2	-0.478572	0.415577	0.0429454	3
YDR217C	RAD9	-0.478275	0.194603	0.0429454	3
YEL065W	SIT1	-0.47773	0.696455	0.0696463	2
YLR014C	PPR1	-0.476211	0.372966	0.0436184	3
YKL029C	MAE1	-0.476176	0.076192	0.0436184	3
YPR143W	RRP15	-0.475832	0.0376708	0.0436184	3
YIL119C	RPI1	-0.475459	0.296916	0.0436184	3
YDR282C		-0.475416	0.113017	0.0703409	2
YMR141C		-0.474965	0.16177	0.0443004	3
YML054C	CYB2	-0.474702	0.0796841	0.0443004	3
YDR121W	DPB4	-0.474026	0.245738	0.0443004	3
YLL032C		-0.473601	0.532062	0.0443004	3
YFR035C		-0.473481	0.149696	0.0443004	3
YJL126W	NIT2	-0.473248	0.219819	0.0443004	3
YNL188W	KAR1	-0.472332	0.124146	0.0449914	3
YNL061W	NOP2	-0.471838	0.0745305	0.0449914	3
YJR040W	GEF1	-0.471473	0.176898	0.0449914	3
YDR490C	PKH1	-0.471184	1.75333	0.0717541	2
YHL042W		-0.470777	0.5249	0.0449914	3
YJL059W	YHC3	-0.469986	0.584221	0.0456916	3
YGR055W	MUP1	-0.468261	0.312275	0.0456916	3
YER006W	NUG1	-0.468097	0.398976	0.0456916	3
YDR010C		-0.467473	0.311139	0.046401	3
YJL214W	HXT8	-0.466942	0.299896	0.046401	3
YGL157W		-0.466564	0.421519	0.046401	3
YDR487C	RIB3	-0.466513	0.0812396	0.046401	3
YPL241C	CIN2	-0.466162	0.325115	0.046401	3
YHL012W		-0.465716	0.596118	0.046401	3
YDR422C	SIP1	-0.464848	0.242559	0.0471199	3
YBL035C	POL12	-0.464153	0.331059	0.0471199	3
YCR083W	TRX3	-0.463509	0.47725	0.0471199	3
YNL253W	TEX1	-0.462717	0.703042	0.0471199	3
YOR153W	PDR5	-0.462604	0.334453	0.0471199	3
YIL156W	UBP7	-0.461309	0.295764	0.0478482	3
YHR115C	DMA1	-0.461164	0.178413	0.0478482	3
YPL107W		-0.460816	0.636314	0.0478482	3
YKR101W	SIR1	-0.460643	0.30502	0.0478482	3
YMR246W	FAA4	-0.46049	0.0743758	0.0478482	3
YLR248W	RCK2	-0.460203	0.257815	0.0478482	3
YLR455W		-0.459625	0.956263	0.0485862	3
YOL055C	THI20	-0.457633	0.555181	0.0485862	3
YGL048C	RPT6	-0.457483	0.118902	0.0493339	3
YKL094W	YJU3	-0.456726	0.0535618	0.0493339	3
YLR384C	IKI3	-0.456592	0.167974	0.0493339	3
YIL010W	DOT5	-0.456	0.113436	0.0761994	2
YLR262C	YPT6	-0.455942	0.243454	0.0493339	3
YBR157C	ICS2	-0.455061	0.364826	0.0493339	3
YLR001C		-0.455031	0.20528	0.0493339	3
YJL170C	ASG7	-0.454946	0.364329	0.0500915	3
YMR043W	MCM1	-0.454528	0.591777	0.0500915	3
YGL201C	MCM6	-0.453549	0.239213	0.0500915	3
YKL131W		-0.451879	0.0484843	0.0508591	3
YNL249C	MPA43	-0.451729	1.59856	0.0508591	3
YDR109C		-0.4514	0.675654	0.0508591	3
YPL130W	SPO19	-0.450411	0.35702	0.0508591	3
YJL201W	ECM25	-0.45009	0.215082	0.0508591	3
YGR106C	VOA1	-0.449852	0.291586	0.0516368	3
YGL031C	RPL24A	-0.449466	0.260044	0.0516368	3
YNL142W	MEP2	-0.448044	0.544488	0.0516368	3
YPL146C	NOP53	-0.447196	0.556437	0.0524249	3
YJL033W	HCA4	-0.447035	0.349136	0.0524249	3
YDL177C		-0.446593	0.299255	0.0524249	3
YIL052C	RPL34B	-0.446244	0.0616483	0.079353	2
YGL256W	ADH4	-0.444763	0.500854	0.0532233	3
YOR094W	ARF3	-0.444623	0.409273	0.0532233	3
YOL042W	NGL1	-0.444616	0.292853	0.0532233	3
YHR164C	DNA2	-0.443601	0.20168	0.0532233	3
YFR032C-B		-0.443302	0.166506	0.0532233	3
YPL247C		-0.442908	0.150797	0.0532233	3
YER037W	PHM8	-0.441135	0.235649	0.0540324	3
YPL091W	GLR1	-0.44037	0.0758487	0.0540324	3
YDR338C		-0.440134	0.206636	0.0540324	3
YGL199C		-0.439344	0.20835	0.0548522	3
YLR215C	CDC123	-0.438768	0.447992	0.0548522	3
YLR092W	SUL2	-0.438347	0.138183	0.0548522	3
YJL122W	ALB1	-0.43799	0.309737	0.0548522	3
YPL220W	RPL1A	-0.437538	0.531951	0.0548522	3
YKR008W	RSC4	-0.437516	0.22734	0.0548522	3
YJL016W		-0.436992	0.301487	0.0556828	3
YOR079C	ATX2	-0.436956	0.389433	0.0556828	3
YLR036C		-0.436625	0.20239	0.0826786	2
YIL096C		-0.435997	0.135524	0.0826786	2
YER048C	CAJ1	-0.435862	0.27326	0.0556828	3
YPL017C	IRC15	-0.435676	0.336954	0.0556828	3
YFL040W		-0.434775	0.10829	0.0835391	2
YOL123W	HRP1	-0.43426	0.365981	0.0565245	3
YHR118C	ORC6	-0.432466	0.394975	0.0573775	3
YLR287C		-0.431859	0.207485	0.0573775	3
YMR170C	ALD2	-0.431795	0.474631	0.0573775	3
YDR058C	TGL2	-0.431548	0.399507	0.0844119	2
YGL198W	YIP4	-0.430121	0.101326	0.0573775	3
YGR173W	RBG2	-0.429902	0.234	0.0582418	3
YDR084C	TVP23	-0.429817	0.604901	0.0852973	2
YDR277C	MTH1	-0.429303	0.141379	0.0852973	2
YAL031C	GIP4	-0.429038	0.106177	0.0582418	3
YOL013C	HRD1	-0.428405	0.293303	0.0582418	3
YGR291C		-0.427901	0.0726714	0.0582418	3
YKL173W	SNU114	-0.426847	0.276106	0.0591177	3
YNL270C	ALP1	-0.426492	0.369346	0.0591177	3
YOR371C	GPB1	-0.426257	0.297598	0.0591177	3
YML015C	TAF11	-0.426175	0.26333	0.0591177	3
YKL021C	MAK11	-0.425995	0.0653535	0.0591177	3
YKR019C	IRS4	-0.425232	0.325683	0.0591177	3
YDR120C	TRM1	-0.424879	0.368838	0.0600054	3
YER117W	RPL23B	-0.424514	0.229462	0.0600054	3
YIL138C	TPM2	-0.423601	0.243628	0.0600054	3
YIL008W	URM1	-0.423208	0.00495806	0.0871075	2
YLR048W	RPS0B	-0.422845	0.102191	0.0600054	3
YDR201W	SPC19	-0.422465	0.278658	0.060905	3
YLR108C		-0.422337	0.275762	0.060905	3
YBR242W		-0.42172	0.460429	0.060905	3
YML054C-A		-0.421284	0.463996	0.060905	3
YGR012W		-0.421043	0.139248	0.060905	3
YJR141W		-0.419848	0.140801	0.0618168	3
YGL156W	AMS1	-0.419826	0.123417	0.0618168	3
YIL136W	OM45	-0.419815	0.160142	0.0618168	3
YER158C		-0.419307	0.105199	0.0618168	3
YBR055C	PRP6	-0.419105	0.374099	0.0618168	3
YOR144C	ELG1	-0.418303	0.305434	0.0889728	2
YOL105C	WSC3	-0.41738	0.312898	0.062741	3
YPL137C	GIP3	-0.41715	0.365046	0.062741	3
YDR260C	SWM1	-0.416947	0.00179693	0.089927	2
YNL130C-A	DGR1	-0.416879	0.394761	0.062741	3
YMR222C	FSH2	-0.416763	0.385164	0.062741	3
YFR040W	SAP155	-0.416205	0.241008	0.062741	3
YOR254C	SEC63	-0.416065	0.0451704	0.062741	3
YOR260W	GCD1	-0.415919	0.171794	0.062741	3
YNL222W	SSU72	-0.415277	0.119489	0.062741	3
YHL009C	YAP3	-0.414597	0.411402	0.0636778	3
YNR055C	HOL1	-0.414346	0.85098	0.0636778	3
YGL232W	TAN1	-0.414297	0.328746	0.0636778	3
YOL164W-A		-0.414192	0.180376	0.0636778	3
YKL171W		-0.414161	0.25084	0.0636778	3
YBR152W	SPP381	-0.41375	1.22607	0.0636778	3
YOR285W		-0.413614	0.506691	0.0636778	3
YMR018W		-0.413489	0.205679	0.0636778	3
YGR097W	ASK10	-0.413247	0.218992	0.0636778	3
YGR044C	RME1	-0.413078	0.125233	0.0636778	3
YPR118W	MRI1	-0.412958	0.210258	0.0636778	3
YPL267W	ACM1	-0.412544	0.583472	0.0636778	3
YLL060C	GTT2	-0.412069	0.24475	0.0646274	3
YDR387C		-0.411437	0.426303	0.0646274	3
YNR021W		-0.411284	0.27655	0.0646274	3
YKL206C	ADD66	-0.411117	0.0909963	0.0918809	2
YFL028C	CAF16	-0.411001	0.207381	0.0918809	2
YBR169C	SSE2	-0.40977	0.0786428	0.0655901	3
YPL073C		-0.408511	0.242084	0.0655901	3
YNL273W	TOF1	-0.407669	0.884884	0.0655901	3
YOR341W	RPA190	-0.407588	0.163861	0.0655901	3
YLR030W		-0.407479	0.242532	0.066566	3
YHL028W	WSC4	-0.406987	0.123317	0.066566	3
YPR054W	SMK1	-0.406423	0.395945	0.066566	3
YKR105C	VBA5	-0.406273	0.357714	0.066566	3
YOR291W		-0.405842	0.232061	0.066566	3
YBR146W	MRPS9	-0.405675	0.275506	0.066566	3
YOL070C	NBA1	-0.405142	0.409462	0.066566	3
YNL334C	SNO2	-0.404814	0.33317	0.0675555	3
YBR293W	VBA2	-0.404628	0.391662	0.0675555	3
YHL047C	ARN2	-0.404571	0.891445	0.0675555	3
YKL185W	ASH1	-0.404495	0.183114	0.0675555	3
YGL090W	LIF1	-0.404384	0.207897	0.0675555	3
YPR079W	MRL1	-0.403423	0.380224	0.0675555	3
YBR277C		-0.403325	0.337559	0.0675555	3
YDL175C	AIR2	-0.403313	0.223689	0.0675555	3
YGR074W	SMD1	-0.403133	0.354061	0.0675555	3
YPR115W		-0.402015	0.472528	0.0685589	3
YKL107W		-0.401714	0.0759138	0.0685589	3
YPL209C	IPL1	-0.401634	0.246235	0.0685589	3
YGL099W	LSG1	-0.400902	0.371037	0.0685589	3
YKL204W	EAP1	-0.400302	0.490707	0.0959822	2
YPL124W	SPC29	-0.399936	0.281701	0.0695763	3
YOR370C	MRS6	-0.399887	0.34018	0.0695763	3
YJL007C		-0.399776	0.378111	0.0695763	3
YJL206C-A		-0.399689	0.143142	0.0970506	2
YML063W	RPS1B	-0.399125	0.689709	0.0695763	3
YHR071W	PCL5	-0.398781	0.119049	0.0695763	3
YOL076W	MDM20	-0.398044	0.48742	0.0695763	3
YDL039C	PRM7	-0.397843	0.203466	0.0970506	2
YNL070W	TOM7	-0.397701	0.0964641	0.0695763	3
YGL185C		-0.397595	0.334826	0.0695763	3
YHR163W	SOL3	-0.397556	0.570811	0.0695763	3
YLR065C		-0.39735	0.278136	0.0706081	3
YPL186C	UIP4	-0.397306	0.305261	0.0706081	3
YPL145C	KES1	-0.396927	0.256957	0.0706081	3
YGL217C		-0.396251	0.334671	0.0706081	3
YBR173C	UMP1	-0.396018	0.648055	0.0706081	3
YJR116W		-0.395831	0.173325	0.0706081	3
YNL192W	CHS1	-0.395653	0.134123	0.0706081	3
YOR364W		-0.395598	0.54348	0.0706081	3
YGL092W	NUP145	-0.39519	1.24952	0.0706081	3
YFR032C-A	RPL29	-0.394831	0.193363	0.0716545	3
YBR019C	GAL10	-0.394645	0.0665937	0.0716545	3
YNL091W	NST1	-0.394273	0.220224	0.0716545	3
YGL228W	SHE10	-0.394178	0.344944	0.0716545	3
YLR247C	IRC20	-0.393846	0.270127	0.0716545	3
YGL251C	HFM1	-0.39342	0.116202	0.0716545	3
YPL058C	PDR12	-0.393283	0.0266714	0.0716545	3
YCL045C		-0.393121	1.32866	0.0716545	3
YDL172C		-0.392672	0.238772	0.0716545	3
YHR123W	EPT1	-0.39264	0.535518	0.0716545	3
YDR464W	SPP41	-0.39263	0.493565	0.0716545	3
YMR159C	ATG16	-0.392086	0.0254942	0.072716	3
YHR076W	PTC7	-0.391972	0.14638	0.072716	3
YGR134W	CAF130	-0.391818	0.1916	0.100367	2
YAL064C-A		-0.391625	0.171609	0.072716	3
YHR037W	PUT2	-0.39156	0.375082	0.072716	3
YBR056W		-0.391524	0.680684	0.072716	3
YPL041C		-0.390552	0.220253	0.100367	2
YER033C	ZRG8	-0.390146	0.13885	0.072716	3
YER004W	FMP52	-0.390032	0.266002	0.072716	3
YKL139W	CTK1	-0.389998	0.289693	0.0737927	3
YPR144C	NOC4	-0.38932	0.16647	0.0737927	3
YMR152W	YIM1	-0.389193	0.216271	0.0737927	3
YGR122C-A		-0.389108	0.148754	0.0737927	3
YNL002C	RLP7	-0.389105	0.0632206	0.0737927	3
YBR301W	DAN3	-0.389074	0.399313	0.101512	2
YPL092W	SSU1	-0.389022	0.334247	0.0737927	3
YGR083C	GCD2	-0.388411	0.126751	0.0737927	3
YLR063W		-0.388099	0.043002	0.101512	2
YPL110C	GDE1	-0.387816	0.387937	0.0737927	3
YLL046C	RNP1	-0.387649	0.16036	0.0737927	3
YPR176C	BET2	-0.385991	0.136241	0.0748851	3
YPL192C	PRM3	-0.385693	0.171403	0.0748851	3
YOR248W		-0.385026	0.2478	0.0748851	3
YML027W	YOX1	-0.384748	1.56257	0.0759935	3
YIL075C	RPN2	-0.384552	0.286606	0.0759935	3
YBR199W	KTR4	-0.3845	0.28353	0.0759935	3
YGL118C		-0.384267	0.195415	0.0759935	3
YBR150C	TBS1	-0.384205	0.424168	0.0759935	3
YLR391W		-0.384161	0.208146	0.0759935	3
YBR264C	YPT10	-0.384061	0.321922	0.0759935	3
YHL022C	SPO11	-0.383826	0.782679	0.0759935	3
YEL010W		-0.38362	0.210887	0.0759935	3
YMR245W		-0.383401	0.275435	0.0759935	3
YGL177W		-0.383347	0.313469	0.0759935	3
YGR271W	SLH1	-0.382787	0.0678109	0.0759935	3
YBL105C	PKC1	-0.382611	0.355468	0.0759935	3
YIL142W	CCT2	-0.382466	0.0413173	0.0771181	3
YAL059W	ECM1	-0.381918	0.194771	0.0771181	3
YOL038W	PRE6	-0.380741	0.366785	0.0771181	3
YML017W	PSP2	-0.380638	0.424233	0.0771181	3
YOR068C	VAM10	-0.380636	0.783687	0.0771181	3
YKL159C	RCN1	-0.380619	0.0465636	0.0771181	3
YGR155W	CYS4	-0.380283	0.363275	0.0771181	3
YJR094C	IME1	-0.38017	0.326253	0.0771181	3
YLL009C	COX17	-0.379914	0.182758	0.0782595	3
YHR185C	PFS1	-0.379756	0.186545	0.0782595	3
YER166W	DNF1	-0.378736	0.257385	0.0782595	3
YHR181W	SVP26	-0.37873	0.168892	0.106301	2
YJR063W	RPA12	-0.378041	0.353454	0.0782595	3
YMR106C	YKU80	-0.377986	0.165502	0.0782595	3
YKL068W-A		-0.377905	0.0365011	0.0782595	3
YGL055W	OLE1	-0.377655	0.327558	0.0782595	3
YOR231W	MKK1	-0.377497	0.113928	0.079418	3
YPL166W	ATG29	-0.377315	0.580884	0.079418	3
YDL130W-A	STF1	-0.376669	0.0777819	0.079418	3
YPR038W	IRC16	-0.376563	0.31645	0.079418	3
YCL006C		-0.37624	0.424147	0.079418	3
YKL051W	SFK1	-0.375681	0.385887	0.079418	3
YKR099C-A		-0.375604	0.0435166	0.079418	3
YJL137C	GLG2	-0.374494	0.26135	0.0805941	3
YIL145C	PAN6	-0.374244	0.464954	0.0805941	3
YKL092C	BUD2	-0.373804	0.119399	0.0805941	3
YNL204C	SPS18	-0.372426	0.298573	0.081788	3
YOR064C	YNG1	-0.371853	0.017729	0.081788	3
YOR057W	SGT1	-0.37167	0.128394	0.081788	3
YER188W		-0.371435	0.177803	0.081788	3
YAL027W	SAW1	-0.37113	0.194596	0.081788	3
YJR014W	TMA22	-0.371023	0.612849	0.081788	3
YML092C	PRE8	-0.37045	0.152998	0.081788	3
YOR344C	TYE7	-0.370196	0.462893	0.081788	3
YNL095C		-0.369386	0.179431	0.0830003	3
YIL028W		-0.368646	0.296634	0.111455	2
YML002W		-0.368531	0.0567305	0.0830003	3
YOL019W-A		-0.367279	0.328059	0.0842314	3
YIL056W	VHR1	-0.366953	0.280117	0.0842314	3
YJL036W	SNX4	-0.36571	0.317997	0.0842314	3
YJR024C	MDE1	-0.365123	0.364528	0.0842314	3
YLL061W	MMP1	-0.364985	0.202343	0.0854817	3
YLR054C	OSW2	-0.364501	0.160706	0.0854817	3
YGR232W	NAS6	-0.364058	0.291287	0.0854817	3
YCR091W	KIN82	-0.363623	0.283786	0.0854817	3
YAR030C		-0.363537	0.238887	0.0854817	3
YOR019W		-0.36351	0.203422	0.0854817	3
YPR027C		-0.363473	0.200146	0.0854817	3
YMR215W	GAS3	-0.363054	0.330486	0.0854817	3
YCR010C	ADY2	-0.362633	0.441167	0.0854817	3
YBR129C	OPY1	-0.362498	0.758763	0.0867519	3
YDR478W	SNM1	-0.362378	0.195539	0.0867519	3
YJL110C	GZF3	-0.362335	0.158547	0.0867519	3
YPR192W	AQY1	-0.360781	0.38265	0.0867519	3
YLR015W	BRE2	-0.360624	0.494205	0.0867519	3
YLR146C	SPE4	-0.358949	0.401474	0.0880423	3
YDL189W	RBS1	-0.358687	0.245655	0.0880423	3
YGL010W		-0.358478	0.166884	0.0880423	3
YGL241W	KAP114	-0.357981	0.0263686	0.0880423	3
YOL062C	APM4	-0.357586	0.238001	0.0880423	3
YDR438W	THI74	-0.357554	0.417077	0.0880423	3
YGL144C	ROG1	-0.357384	0.207921	0.0893535	3
YER113C	TMN3	-0.357046	0.178952	0.0893535	3
YOR099W	KTR1	-0.356382	0.38735	0.0893535	3
YKL044W		-0.355973	0.384899	0.118477	2
YOR142W	LSC1	-0.355881	0.295964	0.0893535	3
YGR089W	NNF2	-0.355813	0.0308919	0.0893535	3
YDR087C	RRP1	-0.355246	0.127613	0.0893535	3
YCL002C		-0.354561	0.651567	0.0906861	3
YDL062W		-0.354473	0.521331	0.0906861	3
YHR106W	TRR2	-0.354448	0.341102	0.0906861	3
YBL041W	PRE7	-0.354381	0.206191	0.0906861	3
YDR412W	RRP17	-0.354326	0.400763	0.0906861	3
YKL149C	DBR1	-0.354312	0.220823	0.0906861	3
YBR230C	OM14	-0.353954	0.409595	0.0906861	3
YML003W		-0.353501	0.724212	0.0906861	3
YOL141W	PPM2	-0.35347	0.325801	0.0906861	3
YFR031C-A	RPL2A	-0.353404	0.0781481	0.119966	2
YPL147W	PXA1	-0.353255	0.210345	0.0906861	3
YPL162C		-0.352823	0.35753	0.0906861	3
YER020W	GPA2	-0.35273	0.376923	0.0906861	3
YIL111W	COX5B	-0.35242	0.0601167	0.121485	2
YDR052C	DBF4	-0.352207	0.131296	0.0920405	3
YNL227C	JJJ1	-0.350634	0.262952	0.0920405	3
YBL019W	APN2	-0.34986	0.0797331	0.0934175	3
YBL050W	SEC17	-0.349456	0.212206	0.0934175	3
YOR032C	HMS1	-0.349437	0.307675	0.0934175	3
YJL001W	PRE3	-0.348054	0.341196	0.0934175	3
YLL057C	JLP1	-0.347997	0.230534	0.0934175	3
YLR231C	BNA5	-0.346975	0.0883188	0.0948176	3
YDR451C	YHP1	-0.346771	0.326932	0.0948176	3
YBR125C	PTC4	-0.34635	0.176726	0.0948176	3
YPL212C	PUS1	-0.345358	1.06213	0.0948176	3
YKL041W	VPS24	-0.345061	0.632663	0.0948176	3
YBR067C	TIP1	-0.344898	0.320517	0.0962414	3
YLR374C		-0.344682	1.40506	0.0962414	3
YOR193W	PEX27	-0.344622	0.0491691	0.0962414	3
YNR024W	MPP6	-0.344473	0.141332	0.0962414	3
YMR306C-A		-0.344318	0.184635	0.0962414	3
YGL114W		-0.342672	0.492686	0.0962414	3
YML037C		-0.342648	0.323283	0.0962414	3
YLR431C	ATG23	-0.342229	0.420532	0.0976896	3
YJR038C		-0.34191	0.281431	0.0976896	3
YNR027W	BUD17	-0.341297	0.0687501	0.0976896	3
YPR111W	DBF20	-0.340949	0.169285	0.0976896	3
YOL098C		-0.340138	0.273754	0.0976896	3
YPL170W	DAP1	-0.339846	0.222101	0.0991628	3
YER186C		-0.339734	0.225012	0.0991628	3
YHR039C	MSC7	-0.339654	0.245891	0.0991628	3
YPL099C		-0.338651	0.408011	0.0991628	3
YDR205W	MSC2	-0.338085	0.0795463	0.0991628	3
YDR447C	RPS17B	-0.336804	0.873624	0.100662	3
YAL049C		-0.336697	0.24367	0.100662	3
YHR200W	RPN10	-0.336373	1.55041	0.100662	3
YNL275W	BOR1	-0.334781	0.186145	0.102187	3
YOR351C	MEK1	-0.334268	0.203944	0.102187	3
YKL018C-A		-0.334178	0.0679514	0.102187	3
YNL170W		-0.333534	0.110703	0.133025	2
YBL004W	UTP20	-0.332992	0.274011	0.102187	3
YDL089W	NUR1	-0.332692	0.237957	0.102187	3
YGR008C	STF2	-0.332565	0.478301	0.102187	3
YIL166C		-0.332374	0.350109	0.10374	3
YPL181W	CTI6	-0.332195	0.196264	0.10374	3
YDR061W		-0.331687	0.397053	0.10374	3
YGL049C	TIF4632	-0.331372	0.238854	0.10374	3
YER184C		-0.331121	0.188205	0.10374	3
YCL056C		-0.331084	0.234704	0.10374	3
YEL032W	MCM3	-0.330711	0.456743	0.10374	3
YDR166C	SEC5	-0.330592	0.350157	0.10374	3
YDR468C	TLG1	-0.32984	0.385652	0.105321	3
YBR276C	PPS1	-0.329707	0.16128	0.105321	3
YGR090W	UTP22	-0.329064	0.02545	0.105321	3
YBL092W	RPL32	-0.329029	0.150774	0.105321	3
YGL109W		-0.328982	0.196662	0.105321	3
YDR254W	CHL4	-0.328784	0.137573	0.13664	2
YDR419W	RAD30	-0.328602	0.368845	0.105321	3
YOL126C	MDH2	-0.328359	0.170467	0.105321	3
YBR001C	NTH2	-0.327946	0.219059	0.105321	3
YJL061W	NUP82	-0.327704	0.46469	0.105321	3
YDR428C	BNA7	-0.327604	0.190422	0.105321	3
YNL015W	PBI2	-0.327104	0.330209	0.10693	3
YPR004C		-0.3269	0.108443	0.10693	3
YPR183W	DPM1	-0.326853	0.229785	0.10693	3
YER038C	KRE29	-0.326342	0.432135	0.10693	3
YOR192C	THI72	-0.325856	0.194397	0.10693	3
YFR038W	IRC5	-0.325322	0.05978	0.10693	3
YMR182W-A		-0.325227	0.110209	0.10693	3
YJL012C	VTC4	-0.325061	0.463417	0.10693	3
YBR162C	TOS1	-0.324997	0.364037	0.14041	2
YOL007C	CSI2	-0.324898	0.608626	0.10857	3
YJL112W	MDV1	-0.324055	0.200361	0.14041	2
YER187W		-0.323631	0.149225	0.10857	3
YAL034W-A	MTW1	-0.323463	0.240987	0.10857	3
YDR510W	SMT3	-0.323313	0.642246	0.10857	3
YOR304C-A		-0.323095	0.0592729	0.14041	2
YGL067W	NPY1	-0.322573	0.322448	0.10857	3
YOR020W-A		-0.321435	0.12388	0.110239	3
YOR293C-A		-0.321243	0.137407	0.110239	3
YLR230W		-0.321214	0.285219	0.110239	3
YBR107C	IML3	-0.321198	1.06711	0.110239	3
YMR068W	AVO2	-0.320859	0.166708	0.142355	2
YBR016W		-0.320712	0.0336696	0.110239	3
YIR042C		-0.320359	0.280392	0.142355	2
YCL012W		-0.320278	0.531387	0.110239	3
YDR101C	ARX1	-0.318123	0.471919	0.11194	3
YIR015W	RPR2	-0.318049	0.169536	0.11194	3
YJL089W	SIP4	-0.317825	0.210103	0.11194	3
YJL058C	BIT61	-0.317662	0.421451	0.11194	3
YBR004C	GPI18	-0.317492	0.222224	0.113673	3
YOR247W	SRL1	-0.316606	0.253397	0.113673	3
YOR048C	RAT1	-0.316589	0.104131	0.113673	3
YAR002C-A	ERP1	-0.316411	0.0743628	0.113673	3
YLR416C		-0.315759	0.333315	0.113673	3
YKR098C	UBP11	-0.315657	0.172967	0.113673	3
YLR176C	RFX1	-0.314738	0.290313	0.11544	3
YPL020C	ULP1	-0.314513	0.338473	0.11544	3
YPR095C	SYT1	-0.314174	0.214963	0.11544	3
YPR125W	YLH47	-0.313849	0.164965	0.11544	3
YDR349C	YPS7	-0.313772	0.482876	0.11544	3
YLR183C	TOS4	-0.313658	0.293651	0.148444	2
YJL015C		-0.313585	0.162999	0.11544	3
YOR091W	TMA46	-0.312595	0.348629	0.11544	3
YGR011W		-0.312053	0.111749	0.117241	3
YJL073W	JEM1	-0.311999	0.228809	0.117241	3
YDR182W	CDC1	-0.311982	0.354037	0.117241	3
YKR015C		-0.311617	0.118441	0.150561	2
YAL066W		-0.311523	0.19438	0.117241	3
YFL041W-A		-0.311231	0.0718868	0.117241	3
YMR092C	AIP1	-0.310559	0.20899	0.150561	2
YLR210W	CLB4	-0.309959	0.238087	0.119076	3
YHR049W	FSH1	-0.307967	0.548924	0.119076	3
YMR303C	ADH2	-0.307493	0.242121	0.120948	3
YNL299W	TRF5	-0.30713	0.027495	0.120948	3
YNR046W	TRM112	-0.306705	1.01107	0.120948	3
YKL062W	MSN4	-0.306296	0.190282	0.120948	3
YER036C	ARB1	-0.306056	0.410448	0.120948	3
YPL109C		-0.305991	0.456949	0.120948	3
YDL071C		-0.305934	0.160382	0.120948	3
YLR165C	PUS5	-0.305625	0.137744	0.120948	3
YNL110C	NOP15	-0.30562	0.171221	0.120948	3
YKR047W		-0.305049	0.382666	0.154933	2
YGL260W		-0.304906	0.388701	0.122857	3
YHR130C		-0.304211	0.351008	0.122857	3
YNL028W		-0.304146	0.237146	0.122857	3
YDR007W	TRP1	-0.303686	0.171065	0.122857	3
YNL179C		-0.303156	0.334862	0.122857	3
YML060W	OGG1	-0.303045	0.43532	0.122857	3
YLR137W		-0.302987	0.216439	0.122857	3
YIL021W	RPB3	-0.302899	0.24293	0.122857	3
YDR255C	RMD5	-0.302444	0.111513	0.159497	2
YEL058W	PCM1	-0.302192	0.120379	0.124805	3
YGR209C	TRX2	-0.301738	0.149654	0.124805	3
YPL039W		-0.301623	0.337846	0.124805	3
YLR413W		-0.301282	0.121163	0.124805	3
YPL035C		-0.300946	0.405834	0.124805	3
YPR142C		-0.300488	0.151172	0.124805	3
YDR331W	GPI8	-0.300223	0.398049	0.124805	3
YGR234W	YHB1	-0.299575	0.369238	0.126792	3
YDR165W	TRM82	-0.29917	0.346595	0.126792	3
YHR031C	RRM3	-0.29903	0.579926	0.126792	3
YPL194W	DDC1	-0.298733	0.387604	0.126792	3
YDR515W	SLF1	-0.298502	0.125665	0.126792	3
YOL137W	BSC6	-0.298479	0.453105	0.126792	3
YFL010W-A	AUA1	-0.298326	0.097528	0.126792	3
YJL034W	KAR2	-0.297931	0.806508	0.126792	3
YDR467C		-0.297623	1.1542	0.126792	3
YMR100W	MUB1	-0.297261	0.0940955	0.128819	3
YCL036W	GFD2	-0.296723	0.301633	0.128819	3
YJL133W	MRS3	-0.296424	0.130352	0.128819	3
YPL113C		-0.296393	0.165219	0.128819	3
YGL238W	CSE1	-0.295488	0.368328	0.128819	3
YJL013C	MAD3	-0.295446	0.477595	0.128819	3
YDR104C	SPO71	-0.294681	0.557547	0.130888	3
YGL179C	TOS3	-0.29431	0.0986069	0.130888	3
YGL061C	DUO1	-0.294183	0.110975	0.130888	3
YPL258C	THI21	-0.292213	0.329878	0.133	3
YGR049W	SCM4	-0.291926	0.153065	0.133	3
YHR092C	HXT4	-0.291319	0.479064	0.133	3
YLR112W		-0.291288	0.228438	0.133	3
YKL162C-A		-0.29122	0.224183	0.16923	2
YHR175W-A		-0.290814	0.178094	0.133	3
YNL276C		-0.290558	0.0359666	0.133	3
YBR167C	POP7	-0.290515	0.245209	0.133	3
YOR197W	MCA1	-0.289891	0.229661	0.135156	3
YFR049W	YMR31	-0.289476	0.076457	0.135156	3
YPR146C		-0.28946	0.429139	0.135156	3
YOR271C	FSF1	-0.289035	0.421926	0.135156	3
YOR118W	RTC5	-0.288922	0.495343	0.135156	3
YBL070C		-0.288548	0.460109	0.135156	3
YKR093W	PTR2	-0.288214	0.275704	0.135156	3
YOR316C	COT1	-0.288112	0.506975	0.135156	3
YJR129C		-0.287958	0.34857	0.135156	3
YKL033W-A		-0.287555	0.00112309	0.171796	2
YKL157W	APE2	-0.28755	0.122183	0.135156	3
YJL083W	TAX4	-0.287547	0.328311	0.135156	3
YIR035C		-0.287061	0.0883959	0.174417	2
YIL140W	AXL2	-0.285665	0.0972209	0.137358	3
YPR166C	MRP2	-0.285641	0.133393	0.137358	3
YNL247W		-0.285242	0.328641	0.137358	3
YJR127C	RSF2	-0.284742	0.243312	0.139606	3
YBR233W	PBP2	-0.284327	0.256976	0.139606	3
YDL140C	RPO21	-0.284118	0.0569925	0.139606	3
YPL036W	PMA2	-0.283724	0.298301	0.139606	3
YLR297W		-0.283648	0.254979	0.139606	3
YPL115C	BEM3	-0.283469	0.541678	0.139606	3
YHL045W		-0.282944	0.374259	0.139606	3
YJL218W		-0.2827	0.0986463	0.139606	3
YDR476C		-0.281887	0.388873	0.141902	3
YPL249C	GYP5	-0.281673	0.368028	0.141902	3
YGL146C		-0.281464	0.304683	0.141902	3
YLR011W	LOT6	-0.281053	0.268071	0.141902	3
YNL191W	DUG3	-0.281	0.0874892	0.141902	3
YCL021W-A		-0.280602	0.239248	0.141902	3
YPL027W	SMA1	-0.28003	0.151256	0.141902	3
YBR036C	CSG2	-0.278406	0.115791	0.182625	2
YGR120C	COG2	-0.278263	0.446599	0.144247	3
YPL191C		-0.27732	0.384279	0.146644	3
YCR048W	ARE1	-0.27665	0.11326	0.146644	3
YOR047C	STD1	-0.276646	0.199842	0.146644	3
YDL135C	RDI1	-0.276542	0.195738	0.146644	3
YGL134W	PCL10	-0.276465	0.121055	0.146644	3
YLR232W		-0.276302	0.117157	0.185479	2
YDR499W	LCD1	-0.275585	0.733263	0.146644	3
YHR086W-A		-0.275069	0.0952287	0.146644	3
YDR243C	PRP28	-0.274271	0.358912	0.149092	3
YBR239C		-0.274227	0.50164	0.149092	3
YNR006W	VPS27	-0.274123	0.232084	0.149092	3
YMR023C	MSS1	-0.273638	0.457031	0.149092	3
YBR099C		-0.27363	0.211094	0.149092	3
YNR014W		-0.27319	0.433317	0.149092	3
YKL084W	HOT13	-0.273112	0.303048	0.149092	3
YDR506C		-0.272875	0.298667	0.149092	3
YMR136W	GAT2	-0.272756	0.277577	0.149092	3
YGR178C	PBP1	-0.27269	0.0885305	0.149092	3
YJL164C	TPK1	-0.272581	0.107107	0.149092	3
YKL211C	TRP3	-0.272488	0.188828	0.191372	2
YPL125W	KAP120	-0.272219	0.314474	0.151594	3
YCR090C		-0.271817	0.275748	0.151594	3
YDR475C	JIP4	-0.271792	0.00547726	0.151594	3
YLR437C	DIF1	-0.271749	0.291822	0.151594	3
YKL202W		-0.271164	0.145056	0.151594	3
YOL047C		-0.270978	0.524206	0.151594	3
YLL020C		-0.270665	0.367453	0.151594	3
YOL086W-A		-0.27031	0.477442	0.151594	3
YLR081W	GAL2	-0.269863	0.433178	0.15415	3
YBL106C	SRO77	-0.269683	0.106965	0.194412	2
YLR096W	KIN2	-0.269518	0.124537	0.15415	3
YDR021W	FAL1	-0.269433	0.340797	0.15415	3
YLR243W		-0.268594	0.0932778	0.15415	3
YAL018C		-0.26843	0.0595537	0.15415	3
YPL207W	TYW1	-0.267044	0.331232	0.156764	3
YLR133W	CKI1	-0.266718	0.360405	0.156764	3
YLR024C	UBR2	-0.266664	0.289325	0.156764	3
YPL171C	OYE3	-0.266456	0.287425	0.156764	3
YDL105W	NSE4	-0.266308	0.272745	0.156764	3
YJL215C		-0.266128	0.503025	0.156764	3
YGL175C	SAE2	-0.265912	0.271062	0.156764	3
YJL103C	GSM1	-0.265462	0.306974	0.156764	3
YGR142W	BTN2	-0.264927	0.233132	0.159435	3
YML048W-A		-0.264158	0.214502	0.159435	3
YAL036C	RBG1	-0.263898	0.0120074	0.159435	3
YOR044W	IRC23	-0.263645	0.332227	0.159435	3
YER175W-A		-0.263428	0.0422656	0.159435	3
YOR093C		-0.262372	0.214172	0.162166	3
YFR018C		-0.261628	0.0928776	0.203926	2
YOR186W		-0.26135	0.355817	0.203926	2
YOR105W		-0.261183	0.179357	0.162166	3
YMR317W		-0.260666	0.178957	0.162166	3
YLR189C	ATG26	-0.260509	0.348768	0.162166	3
YDL036C	PUS9	-0.260394	0.79434	0.162166	3
YDL020C	RPN4	-0.260349	0.10665	0.203926	2
YFL051C		-0.260276	0.0396238	0.203926	2
YMR279C		-0.259944	0.222207	0.164958	3
YJR083C	ACF4	-0.2597	0.0548239	0.164958	3
YIL035C	CKA1	-0.259329	0.100948	0.207232	2
YGR161C	RTS3	-0.259311	0.552371	0.164958	3
YAL034C	FUN19	-0.258939	0.152652	0.164958	3
YDR002W	YRB1	-0.258821	0.0558867	0.164958	3
YDR089W		-0.258381	0.154656	0.164958	3
YNL105W		-0.258218	0.149124	0.164958	3
YPR082C	DIB1	-0.258017	0.0791608	0.164958	3
YCL052C	PBN1	-0.257717	0.30216	0.164958	3
YPL022W	RAD1	-0.257521	0.224957	0.164958	3
YKL005C	BYE1	-0.257235	0.307642	0.167813	3
YDL190C	UFD2	-0.256738	0.302357	0.167813	3
YPL264C		-0.256298	0.339729	0.167813	3
YOR133W	EFT1	-0.256288	0.189097	0.167813	3
YBR176W	ECM31	-0.256277	0.441899	0.167813	3
YDR436W	PPZ2	-0.255706	0.354775	0.167813	3
YJL152W		-0.255325	0.02228	0.167813	3
YMR003W		-0.255108	0.0614795	0.167813	3
YFL037W	TUB2	-0.254517	0.160866	0.170732	3
YDR099W	BMH2	-0.254397	0.792327	0.170732	3
YNL125C	ESBP6	-0.253399	0.05534	0.170732	3
YMR008C	PLB1	-0.252742	0.0947185	0.170732	3
YGR221C	TOS2	-0.252431	0.152572	0.173716	3
YDR100W	TVP15	-0.252218	0.426232	0.173716	3
YER124C	DSE1	-0.251623	0.269326	0.217567	2
YGL050W	TYW3	-0.251034	0.401954	0.173716	3
YJL185C		-0.250655	0.402784	0.173716	3
YMR158W-A		-0.250398	0.788572	0.173716	3
YML046W	PRP39	-0.249495	0.108595	0.176769	3
YNL277W-A		-0.249385	0.102705	0.176769	3
YLR352W		-0.249285	0.0312376	0.221156	2
YBL055C		-0.24872	0.214801	0.176769	3
YDL008W	APC11	-0.248445	0.13252	0.176769	3
YGL068W	MNP1	-0.248442	0.24917	0.176769	3
YJR124C		-0.248412	0.282076	0.176769	3
YDL154W	MSH5	-0.248306	0.480309	0.176769	3
YBR257W	POP4	-0.247873	0.124211	0.176769	3
YGL025C	PGD1	-0.247443	0.288773	0.179891	3
YGL060W	YBP2	-0.246636	0.438918	0.179891	3
YOR269W	PAC1	-0.246623	0.824785	0.179891	3
YDL193W	NUS1	-0.246072	0.328097	0.179891	3
YFR027W	ECO1	-0.245974	0.137828	0.179891	3
YGL161C	YIP5	-0.245896	0.168681	0.179891	3
YJR148W	BAT2	-0.245775	0.254929	0.179891	3
YGR068C	ART5	-0.245531	0.248327	0.179891	3
YMR183C	SSO2	-0.245458	0.192571	0.179891	3
YHR098C	SFB3	-0.244813	0.150353	0.183084	3
YDR141C	DOP1	-0.244464	0.228462	0.183084	3
YCR012W	PGK1	-0.244447	0.0815548	0.183084	3
YOR289W		-0.244389	0.221343	0.183084	3
YPR053C		-0.243714	0.262745	0.183084	3
YMR012W	CLU1	-0.243712	0.239752	0.183084	3
YOL151W	GRE2	-0.242747	0.210904	0.183084	3
YKR046C	PET10	-0.242702	0.250689	0.183084	3
YGR199W	PMT6	-0.24266	0.327457	0.183084	3
YLR257W		-0.242401	0.113242	0.186349	3
YDR032C	PST2	-0.241929	0.0699809	0.186349	3
YHR156C	LIN1	-0.241274	0.087284	0.186349	3
YBR270C	BIT2	-0.240703	0.242753	0.186349	3
YDL086W		-0.240593	0.0685141	0.186349	3
YDR145W	TAF12	-0.240404	0.11158	0.186349	3
YIL112W	HOS4	-0.240332	0.153623	0.186349	3
YGL008C	PMA1	-0.240325	0.195284	0.186349	3
YKL103C	LAP4	-0.240032	0.258466	0.186349	3
YNL146C-A		-0.239031	0.189586	0.189689	3
YML018C		-0.238936	0.241598	0.189689	3
YPR021C	AGC1	-0.238855	0.391673	0.189689	3
YIL101C	XBP1	-0.238824	0.169621	0.189689	3
YDR379W	RGA2	-0.238811	0.15874	0.236259	2
YBR220C		-0.238745	0.263803	0.189689	3
YDR370C		-0.238303	0.247258	0.189689	3
YFL063W		-0.238228	0.250217	0.189689	3
YOR134W	BAG7	-0.238139	0.420069	0.189689	3
YKL028W	TFA1	-0.237803	0.282368	0.189689	3
YLR026C	SED5	-0.237461	0.153988	0.193106	3
YLR415C		-0.237341	0.104834	0.193106	3
YJL161W	FMP33	-0.237096	0.115925	0.193106	3
YER139C	RTR1	-0.236999	0.0363924	0.193106	3
YGL190C	CDC55	-0.236853	0.0578024	0.193106	3
YPL143W	RPL33A	-0.236704	0.253188	0.193106	3
YJL075C	APQ13	-0.236692	0.147123	0.193106	3
YJR080C		-0.236687	0.0950287	0.193106	3
YOR326W	MYO2	-0.236278	0.289936	0.193106	3
YLR367W	RPS22B	-0.236238	0.283633	0.193106	3
YPR052C	NHP6A	-0.236141	0.222163	0.193106	3
YLR246W	ERF2	-0.235733	1.00549	0.193106	3
YOR092W	ECM3	-0.235416	0.369412	0.193106	3
YJR046W	TAH11	-0.235364	0.264458	0.193106	3
YJR037W		-0.235313	0.230941	0.193106	3
YHR198C		-0.235305	0.38707	0.193106	3
YMR076C	PDS5	-0.235077	0.120997	0.193106	3
YLR032W	RAD5	-0.234793	0.191162	0.1966	3
YPL260W		-0.234576	0.187784	0.1966	3
YCL031C	RRP7	-0.234573	0.260873	0.1966	3
YPL182C		-0.234469	0.377436	0.1966	3
YOR317W	FAA1	-0.23419	0.471418	0.1966	3
YCL044C	MGR1	-0.233758	0.578843	0.1966	3
YOR287C		-0.233562	0.124804	0.1966	3
YLR195C	NMT1	-0.233273	0.114841	0.1966	3
YOR160W	MTR10	-0.233144	0.301988	0.1966	3
YLR404W	FLD1	-0.232768	0.809247	0.1966	3
YGR226C		-0.232674	0.144373	0.1966	3
YGR245C	SDA1	-0.232435	0.292633	0.200174	3
YLR008C	PAM18	-0.232255	0.295425	0.200174	3
YKL050C		-0.232075	0.0403458	0.200174	3
YPL187W	MF(ALPHA)1	-0.23142	0.100255	0.200174	3
YHR110W	ERP5	-0.231191	0.572811	0.200174	3
YOL014W		-0.231168	0.278278	0.200174	3
YOR163W	DDP1	-0.23026	0.353786	0.200174	3
YJL042W	MHP1	-0.229673	0.200466	0.203829	3
YFL049W	SWP82	-0.22925	0.0580671	0.252612	2
YPR030W	CSR2	-0.228896	0.265558	0.203829	3
YIL047C	SYG1	-0.228806	0.0569364	0.252612	2
YCL022C		-0.228804	0.0283123	0.203829	3
YPR126C		-0.227837	0.33533	0.203829	3
YMR326C		-0.227776	0.14835	0.203829	3
YNL239W	LAP3	-0.227434	0.485168	0.256903	2
YDR333C		-0.226839	0.128174	0.256903	2
YOL091W	SPO21	-0.226468	0.131637	0.256903	2
YBR018C	GAL7	-0.226313	0.206187	0.207568	3
YDR216W	ADR1	-0.225865	0.208918	0.207568	3
YBL074C	AAR2	-0.225798	0.155445	0.207568	3
YJL049W		-0.225796	0.270164	0.207568	3
YKL188C	PXA2	-0.225159	0.33609	0.207568	3
YDL010W	GRX6	-0.225001	0.281144	0.207568	3
YNR047W	FPK1	-0.224652	0.716036	0.211392	3
YAL041W	CDC24	-0.223378	0.141831	0.211392	3
YNL042W-B		-0.223237	0.273724	0.211392	3
YLR364W	GRX8	-0.222899	0.530552	0.211392	3
YHR038W	RRF1	-0.222739	0.408815	0.211392	3
YGL097W	SRM1	-0.221904	0.134474	0.215303	3
YNL308C	KRI1	-0.221687	0.0665751	0.215303	3
YAL025C	MAK16	-0.221529	0.254805	0.215303	3
YDR361C	BCP1	-0.221417	0.223928	0.215303	3
YMR107W	SPG4	-0.22123	0.375895	0.215303	3
YMR124W		-0.221009	0.35127	0.265737	2
YJL167W	ERG20	-0.220835	0.0341936	0.215303	3
YBR223C	TDP1	-0.220619	0.200864	0.215303	3
YCL055W	KAR4	-0.220092	0.285972	0.215303	3
YPL167C	REV3	-0.219865	0.504184	0.219303	3
YDR323C	PEP7	-0.219624	0.00183286	0.270281	2
YML010W	SPT5	-0.219093	0.113501	0.219303	3
YIL097W	FYV10	-0.218828	0.143571	0.270281	2
YKR075C		-0.218601	0.271524	0.270281	2
YJL136W-A		-0.21845	0.155769	0.219303	3
YHR133C	NSG1	-0.217699	0.101675	0.219303	3
YLR093C	NYV1	-0.217556	0.0757365	0.219303	3
YER181C		-0.217417	0.215113	0.223393	3
YDR483W	KRE2	-0.217235	0.397739	0.223393	3
YDR178W	SDH4	-0.216885	0.258657	0.223393	3
YBR092C	PHO3	-0.216873	0.0360859	0.274911	2
YGL076C	RPL7A	-0.216569	0.678941	0.223393	3
YIL006W	YIA6	-0.215588	0.116	0.274911	2
YML095C-A		-0.215409	0.420448	0.223393	3
YPR145W	ASN1	-0.215405	0.141094	0.223393	3
YJL027C		-0.214908	0.429167	0.227576	3
YMR322C	SNO4	-0.214896	0.430595	0.227576	3
YDR294C	DPL1	-0.214496	0.0979529	0.279629	2
YPL136W		-0.214101	0.145929	0.227576	3
YDR191W	HST4	-0.213942	0.18137	0.227576	3
YGL259W	YPS5	-0.213613	0.234143	0.227576	3
YGL205W	POX1	-0.213292	0.264799	0.227576	3
YLR199C	PBA1	-0.213096	0.0553959	0.279629	2
YBR296C	PHO89	-0.212567	0.340641	0.227576	3
YKL125W	RRN3	-0.211712	0.183375	0.231853	3
YDR015C		-0.211568	0.222942	0.231853	3
YNL323W	LEM3	-0.211492	0.356237	0.231853	3
YFL034C-A	RPL22B	-0.211413	0.150283	0.231853	3
YCR073C	SSK22	-0.210506	0.462125	0.231853	3
YGL085W		-0.210487	0.148921	0.231853	3
YGR265W		-0.210145	0.195542	0.231853	3
YML096W		-0.21003	0.289575	0.231853	3
YKL102C		-0.209651	0.592941	0.28933	2
YOR382W	FIT2	-0.209333	0.236032	0.236226	3
YGR125W		-0.209215	0.062407	0.236226	3
YBR232C		-0.208366	0.286103	0.236226	3
YKL043W	PHD1	-0.208139	0.264533	0.236226	3
YLR406C-A		-0.208059	0.100635	0.236226	3
YDR168W	CDC37	-0.208039	0.351801	0.236226	3
YMR318C	ADH6	-0.207837	0.457796	0.236226	3
YDL034W		-0.207529	0.0829086	0.236226	3
YKL186C	MTR2	-0.207442	0.21103	0.240697	3
YMR105W-A		-0.207387	0.172623	0.240697	3
YER185W	PUG1	-0.206847	0.0405029	0.240697	3
YGR149W		-0.20669	0.380607	0.240697	3
YOR284W	HUA2	-0.206614	0.38605	0.240697	3
YCR060W	TAH1	-0.206591	0.150079	0.240697	3
YGR290W		-0.206336	0.154649	0.294315	2
YLR296W		-0.206214	0.29526	0.240697	3
YML029W	USA1	-0.20529	0.376689	0.240697	3
YDR425W	SNX41	-0.204668	0.167952	0.245268	3
YKL164C	PIR1	-0.204345	0.229505	0.245268	3
YJR153W	PGU1	-0.204268	0.061905	0.245268	3
YDR180W	SCC2	-0.203872	0.093998	0.245268	3
YBR014C	GRX7	-0.203558	0.183256	0.245268	3
YEL063C	CAN1	-0.20341	0.428107	0.245268	3
YBR087W	RFC5	-0.203331	0.281519	0.245268	3
YBL098W	BNA4	-0.203099	0.257734	0.245268	3
YHR093W	AHT1	-0.203009	0.653484	0.245268	3
YMR125W	STO1	-0.202955	0.225067	0.245268	3
YLL055W	YCT1	-0.202666	0.200265	0.245268	3
YOL111C	MDY2	-0.202649	0.0074738	0.245268	3
YJR142W		-0.2023	0.117154	0.24994	3
YMR105C	PGM2	-0.202188	0.0861053	0.24994	3
YOR313C	SPS4	-0.202164	0.194854	0.24994	3
YPR147C		-0.201768	0.0697914	0.304557	2
YDL109C		-0.201287	0.231133	0.24994	3
YCR075C	ERS1	-0.201203	0.918992	0.24994	3
YIL095W	PRK1	-0.201131	0.337479	0.304557	2
YBL048W		-0.201062	0.326	0.24994	3
YNR008W	LRO1	-0.200332	0.129268	0.24994	3
YKR001C	VPS1	-0.200328	0.182664	0.304557	2
YKR027W	BCH2	-0.199564	0.374749	0.254715	3
YOR007C	SGT2	-0.199391	0.156132	0.254715	3
YOR215C		-0.199034	0.241628	0.254715	3
YER141W	COX15	-0.198971	0.147672	0.254715	3
YLR354C	TAL1	-0.19877	0.14161	0.254715	3
YHR080C		-0.198565	0.232869	0.254715	3
YCR015C		-0.198562	0.546375	0.254715	3
YJR135W-A	TIM8	-0.198281	0.263647	0.254715	3
YDL164C	CDC9	-0.198281	0.491481	0.254715	3
YPR048W	TAH18	-0.198257	0.209957	0.254715	3
YMR316C-A		-0.19814	0.349642	0.254715	3
YLR284C	ECI1	-0.198135	0.21594	0.254715	3
YPL105C	SYH1	-0.198048	0.611823	0.254715	3
YER052C	HOM3	-0.198039	0.323613	0.254715	3
YMR226C		-0.197953	0.132503	0.254715	3
YBR071W		-0.19795	0.167634	0.254715	3
YIL071C	PCI8	-0.196787	0.0447768	0.315169	2
YGL176C		-0.196649	0.256627	0.259595	3
YOR310C	NOP58	-0.196645	0.201185	0.259595	3
YKL017C	HCS1	-0.196516	0.0437609	0.259595	3
YPR017C	DSS4	-0.195702	0.205375	0.259595	3
YJR035W	RAD26	-0.195359	0.288295	0.259595	3
YGR078C	PAC10	-0.195224	1.00996	0.259595	3
YBR254C	TRS20	-0.194831	0.293127	0.264581	3
YCR030C	SYP1	-0.19438	0.858582	0.264581	3
YOR004W	UTP23	-0.193783	0.222879	0.264581	3
YOR379C		-0.19367	0.311725	0.264581	3
YKR081C	RPF2	-0.193453	0.176046	0.264581	3
YDR030C	RAD28	-0.193037	0.227713	0.264581	3
YKR050W	TRK2	-0.192904	0.0708373	0.320615	2
YDL171C	GLT1	-0.192467	0.360314	0.269676	3
YPR122W	AXL1	-0.192248	0.0999524	0.269676	3
YLR273C	PIG1	-0.191994	0.135698	0.269676	3
YOR016C	ERP4	-0.191924	0.289018	0.269676	3
YDL186W		-0.191117	0.356175	0.269676	3
YOR095C	RKI1	-0.191003	0.15251	0.269676	3
YDR502C	SAM2	-0.190475	0.21016	0.269676	3
YNL007C	SIS1	-0.190222	0.267113	0.269676	3
YJL091C	GWT1	-0.190176	0.259989	0.269676	3
YNL039W	BDP1	-0.190151	0.289045	0.269676	3
YIL089W		-0.189922	0.141281	0.331791	2
YDR147W	EKI1	-0.189834	0.0909196	0.274881	3
YGL006W-A		-0.18977	0.316921	0.274881	3
YHR048W	YHK8	-0.189468	0.442715	0.274881	3
YMR206W		-0.18936	0.177304	0.274881	3
YDR400W	URH1	-0.189338	0.301801	0.274881	3
YHR176W	FMO1	-0.189097	0.322481	0.274881	3
YDR304C	CPR5	-0.189053	0.0119647	0.331791	2
YOR021C		-0.188849	0.176811	0.274881	3
YER125W	RSP5	-0.18877	0.0281085	0.274881	3
YOR018W	ROD1	-0.188595	0.0283292	0.331791	2
YNL223W	ATG4	-0.188531	0.602884	0.274881	3
YJL147C		-0.188434	0.585372	0.274881	3
YBR296C-A		-0.188071	0.10387	0.274881	3
YDL210W	UGA4	-0.187211	0.124931	0.280197	3
YOR171C	LCB4	-0.187173	0.21592	0.280197	3
YDL207W	GLE1	-0.186953	0.697624	0.280197	3
YDR379C-A		-0.186549	0.183249	0.280197	3
YJL141C	YAK1	-0.186506	0.157455	0.280197	3
YGR204C-A		-0.186356	0.164547	0.280197	3
YNR016C	ACC1	-0.185758	0.149525	0.280197	3
YGR292W	MAL12	-0.185227	0.236303	0.280197	3
YPR006C	ICL2	-0.185004	0.279383	0.280197	3
YJR013W	GPI14	-0.184782	0.254193	0.285627	3
YKL222C		-0.184678	0.16705	0.34335	2
YKL066W		-0.184599	0.325754	0.285627	3
YER007W	PAC2	-0.184042	0.108366	0.285627	3
YMR289W	ABZ2	-0.183933	0.323755	0.285627	3
YBR273C	UBX7	-0.183912	0.256182	0.285627	3
YMR176W	ECM5	-0.183894	0.0981609	0.285627	3
YER056C	FCY2	-0.183885	0.220357	0.285627	3
YJL207C	LAA1	-0.183759	0.0720086	0.285627	3
YDR520C	URC2	-0.183372	0.567817	0.285627	3
YGL126W	SCS3	-0.182816	0.27935	0.34335	2
YCR037C	PHO87	-0.182723	0.316731	0.285627	3
YKL072W	STB6	-0.182673	0.211452	0.285627	3
YOR339C	UBC11	-0.18263	0.549622	0.285627	3
YOL072W	THP1	-0.182485	0.445566	0.291171	3
YNL246W	VPS75	-0.182003	0.330987	0.291171	3
YIL046W-A		-0.181961	0.355691	0.291171	3
YPR156C	TPO3	-0.181883	0.127474	0.291171	3
YMR254C		-0.181864	0.201735	0.291171	3
YKL091C		-0.181808	0.208852	0.291171	3
YOR003W	YSP3	-0.181681	0.360785	0.291171	3
YMR266W	RSN1	-0.181409	0.422245	0.291171	3
YLR307W	CDA1	-0.181261	0.216482	0.291171	3
YMR253C		-0.181082	0.276642	0.291171	3
YBR148W	YSW1	-0.180484	0.500858	0.291171	3
YGL174W	BUD13	-0.179761	0.153444	0.296832	3
YNL262W	POL2	-0.178396	0.172563	0.296832	3
YDR173C	ARG82	-0.177959	0.205843	0.296832	3
YMR181C		-0.177762	0.112598	0.296832	3
YNL220W	ADE12	-0.177251	0.322622	0.302611	3
YDL209C	CWC2	-0.177223	0.310966	0.302611	3
YER163C		-0.176963	0.0809842	0.302611	3
YKL046C	DCW1	-0.176961	0.084384	0.302611	3
YBL051C	PIN4	-0.176842	1.83527	0.302611	3
YLR458W		-0.176776	0.278964	0.302611	3
YCR102W-A		-0.176716	0.516416	0.302611	3
YDR376W	ARH1	-0.176706	0.287328	0.302611	3
YIL015C-A		-0.176142	0.230223	0.361415	2
YFL033C	RIM15	-0.175724	0.164326	0.302611	3
YLR438W	CAR2	-0.175571	0.53546	0.302611	3
YOR329C	SCD5	-0.175427	0.26133	0.302611	3
YMR121C	RPL15B	-0.175397	0.465536	0.302611	3
YHR078W		-0.175304	0.0820046	0.302611	3
YER182W	FMP10	-0.175202	0.0333656	0.302611	3
YIL113W	SDP1	-0.175137	0.497008	0.302611	3
YOL053C-A		-0.174494	0.278779	0.308509	3
YNR058W	BIO3	-0.174452	0.157174	0.308509	3
YNL157W		-0.174334	0.333326	0.367633	2
YKR097W	PCK1	-0.174082	0.405023	0.308509	3
YGL233W	SEC15	-0.172874	0.374049	0.308509	3
YIL026C	IRR1	-0.172744	0.437491	0.308509	3
YDR340W		-0.17272	0.451949	0.308509	3
YHR005C-A	MRS11	-0.172516	0.280073	0.308509	3
YBR090C		-0.17214	0.181966	0.314527	3
YBR292C		-0.171971	0.20759	0.314527	3
YPR171W	BSP1	-0.17181	0.304519	0.314527	3
YKL064W	MNR2	-0.171799	0.0407323	0.314527	3
YFL010C	WWM1	-0.171748	0.172978	0.314527	3
YOR100C	CRC1	-0.171507	0.390829	0.314527	3
YNL208W		-0.171356	0.274449	0.314527	3
YPL263C	KEL3	-0.171249	0.246834	0.314527	3
YPR154W	PIN3	-0.171246	0.367008	0.314527	3
YKR094C	RPL40B	-0.171075	0.108321	0.314527	3
YKR055W	RHO4	-0.170887	0.0201176	0.373949	2
YGL262W		-0.170818	0.336685	0.314527	3
YML071C	COG8	-0.170816	0.116039	0.314527	3
YGL044C	RNA15	-0.170766	0.206215	0.314527	3
YKL160W	ELF1	-0.170584	1.24045	0.373949	2
YER024W	YAT2	-0.170455	0.190991	0.314527	3
YGR171C	MSM1	-0.170315	0.322434	0.314527	3
YNR069C	BSC5	-0.169867	0.355107	0.320668	3
YOL013W-A		-0.169534	0.0360027	0.380363	2
YGR147C	NAT2	-0.169501	0.240807	0.320668	3
YIR018C-A		-0.168614	0.0944719	0.320668	3
YDR351W	SBE2	-0.168356	0.342812	0.320668	3
YHR112C		-0.168063	0.508216	0.320668	3
YML043C	RRN11	-0.167981	0.249308	0.320668	3
YOR266W	PNT1	-0.167853	0.213075	0.320668	3
YDL162C		-0.16773	0.375786	0.320668	3
YBL043W	ECM13	-0.167378	0.828544	0.326932	3
YJR022W	LSM8	-0.167131	0.109352	0.326932	3
YBR102C	EXO84	-0.167076	0.325976	0.326932	3
YJL105W	SET4	-0.167053	0.201799	0.326932	3
YLR289W	GUF1	-0.166845	0.313368	0.326932	3
YHR134W	WSS1	-0.166741	0.18794	0.326932	3
YFL035C-B		-0.166567	0.234203	0.386877	2
YGL159W		-0.166526	0.254837	0.326932	3
YDL043C	PRP11	-0.166523	0.150642	0.326932	3
YMR265C		-0.166468	0.339822	0.326932	3
YDR479C	PEX29	-0.166359	0.259416	0.326932	3
YAR019C	CDC15	-0.166047	0.156485	0.326932	3
YOL087C		-0.165982	0.0147018	0.386877	2
YPL012W	RRP12	-0.165695	0.191609	0.326932	3
YDR125C	ECM18	-0.165007	0.445815	0.326932	3
YDL169C	UGX2	-0.164925	0.34816	0.33332	3
YHR043C	DOG2	-0.164921	0.228755	0.33332	3
YGL145W	TIP20	-0.164667	0.384284	0.33332	3
YPL074W	YTA6	-0.164491	0.0800581	0.33332	3
YGR050C		-0.164293	0.695039	0.33332	3
YPL156C	PRM4	-0.163985	0.419078	0.33332	3
YBR208C	DUR1,2	-0.163748	0.318462	0.33332	3
YGL101W		-0.163494	0.207181	0.33332	3
YDR198C	RKM2	-0.163011	0.181352	0.33332	3
YGL239C		-0.162785	0.114717	0.33332	3
YJL166W	QCR8	-0.161935	0.307973	0.339834	3
YIL036W	CST6	-0.16141	0.0219859	0.400203	2
YIR017C	MET28	-0.161299	0.0268923	0.400203	2
YER128W		-0.160554	0.321328	0.339834	3
YNL212W	VID27	-0.160301	0.197188	0.339834	3
YPL096W	PNG1	-0.159963	0.185286	0.346475	3
YMR169C	ALD3	-0.159316	0.213829	0.346475	3
YHR210C		-0.159031	0.669709	0.346475	3
YDL001W	RMD1	-0.15899	0.370476	0.346475	3
YOR239W	ABP140	-0.158947	0.241699	0.346475	3
YLR356W		-0.158516	0.376565	0.346475	3
YDL063C		-0.158273	0.0350627	0.346475	3
YNL046W		-0.157526	0.103322	0.346475	3
YNL158W	PGA1	-0.157492	0.288781	0.353244	3
YGL131C	SNT2	-0.157411	0.0555986	0.353244	3
YBR013C		-0.157391	0.833881	0.353244	3
YLR332W	MID2	-0.157195	0.258659	0.353244	3
YLR348C	DIC1	-0.15695	0.162325	0.353244	3
YJR154W		-0.156302	0.163469	0.353244	3
YAL024C	LTE1	-0.156164	0.207351	0.353244	3
YGR066C		-0.156158	0.396166	0.353244	3
YGR170W	PSD2	-0.156127	0.0284667	0.353244	3
YGR098C	ESP1	-0.155876	0.148516	0.353244	3
YDR049W		-0.15586	0.254327	0.353244	3
YGR187C	HGH1	-0.155744	0.0133539	0.353244	3
YHR085W	IPI1	-0.154951	0.323859	0.360142	3
YOR127W	RGA1	-0.154551	0.26942	0.360142	3
[truncated: 3,345 more rows]

## Sheet: mean ratio<0 p<0.001_50 µM Pi
Gene_systematic name	Gene_generic name	average_log2(YFP/RFP) (0=wild type in 50 µM Pi)	standard deviation_log2(YFP/RFP)	p-value of measurement errors	detected number
YFR034C	PHO4	-5.51612	0.121848	4.12081e-33	3
YGR233C	PHO81	-5.17573	0.0725842	1.14204e-29	3
YDL106C	PHO2	-5.0425	0.433604	2.19258e-28	3
YGR159C	NSR1	-3.75501	0.565095	1.28767e-17	3
YPR045C		-3.515	0.93688	6.22249e-16	3
YPL249C-A	RPL36B	-3.36338	1.45735	6.04444e-15	3
YDR382W	RPP2B	-3.35197	0.312325	7.27391e-15	3
YJR151W-A		-3.26584	1.2758	2.51738e-14	3
YDR308C	SRB7	-3.24305	0.763281	3.47898e-14	3
YHR010W	RPL27A	-3.17095	1.00529	9.72471e-14	3
YBR289W	SNF5	-3.16884	0.127992	1.00716e-13	3
YDR174W	HMO1	-3.95442	0.371197	3.29794e-13	2
YMR309C	NIP1	-3.90205	0.497667	6.05429e-13	2
YGR268C	HUA1	-3.87695	0.20776	8.0631e-13	2
YHR041C	SRB2	-2.99895	0.907526	1.02694e-12	3
YDR176W	NGG1	-2.98969	1.4692	1.17283e-12	3
YLL043W	FPS1	-2.98659	1.28872	1.21235e-12	3
YPR044C	OPI11	-3.73455	0.0777448	3.99174e-12	2
YJL175W		-3.70993	0.579263	5.2537e-12	2
YER123W	YCK3	-2.83287	0.144826	8.72154e-12	3
YBL027W	RPL19B	-2.82375	0.236414	9.89351e-12	3
YOR309C		-2.80777	0.594827	1.19442e-11	3
YGR272C		-3.53504	0.0699027	3.33266e-11	2
YBR288C	APM3	-2.71804	0.647454	3.62945e-11	3
YLR062C	BUD28	-2.66633	0.481044	6.83988e-11	3
YLR061W	RPL22A	-2.64923	0.474119	8.42878e-11	3
YDR306C		-3.42529	0.189735	1.03613e-10	2
YOR141C	ARP8	-2.62201	0.925048	1.16763e-10	3
YDR266C		-3.40543	0.0778002	1.2688e-10	2
YMR053C	STB2	-2.60899	0.0925842	1.3528e-10	3
YML122C		-2.57159	0.658611	2.09665e-10	3
YKL075C		-2.56282	1.18444	2.28727e-10	3
YOL093W	TRM10	-3.32182	0.342563	2.96387e-10	2
YPL084W	BRO1	-2.53638	0.603425	3.1415e-10	3
YLL021W	SPA2	-2.51915	0.386357	3.83915e-10	3
YNL010W		-2.48711	0.143603	5.55601e-10	3
YPR051W	MAK3	-2.45279	0.431959	8.01189e-10	3
YBR196C-A		-2.44043	0.31608	9.21453e-10	3
YOR113W	AZF1	-2.43469	0.710942	1.00187e-09	3
YLR184W		-2.41279	0.827677	1.2512e-09	3
YJL024C	APS3	-2.40353	0.312886	1.39758e-09	3
YDL212W	SHR3	-3.13196	0.263706	1.83507e-09	2
YGL188C-A		-3.09389	0.472683	2.59861e-09	2
YBR266C	SLM6	-2.34031	0.765226	2.7713e-09	3
YIR019C	MUC1	-3.06755	0.0730889	3.26977e-09	2
YMR126C	DLT1	-2.30555	0.538078	4.04581e-09	3
YLR127C	APC2	-3.03732	0.342575	4.39636e-09	2
YHL011C	PRS3	-2.29335	0.602132	4.62736e-09	3
YHR034C	PIH1	-2.28899	0.0937213	4.88217e-09	3
YDR314C	RAD34	-3.00153	0.317299	6.02738e-09	2
YIL014W	MNT3	-2.98896	0.623721	6.74078e-09	2
YMR054W	STV1	-2.24713	0.157563	7.67953e-09	3
YHR030C	SLT2	-2.23754	0.168374	8.3146e-09	3
YOR221C	MCT1	-2.23061	0.337621	9.00094e-09	3
YGL018C	JAC1	-2.94817	0.256616	9.61393e-09	2
YHL023C	RMD11	-2.94633	0.60096	9.82819e-09	2
YHR203C	RPS4B	-2.21186	1.09131	1.11136e-08	3
YKL065C	YET1	-2.181	1.37715	1.52207e-08	3
YHR151C	MTC6	-2.1735	0.284892	1.64604e-08	3
YKL144C	RPC25	-2.15362	0.236916	2.02703e-08	3
YEL062W	NPR2	-2.14034	0.425751	2.30771e-08	3
YLR068W	FYV7	-2.13402	1.22137	2.49405e-08	3
YDR263C	DIN7	-2.83404	1.10854	2.60282e-08	2
YMR260C	TIF11	-2.79448	0.897369	3.64894e-08	2
YML014W	TRM9	-2.08745	0.287849	4.0676e-08	3
YDR073W	SNF11	-2.08081	0.470064	4.28142e-08	3
YJL188C	BUD19	-2.74765	3.16436	5.3081e-08	2
YLR428C		-2.04987	0.50906	5.96636e-08	3
YAL044C	GCV3	-2.04894	0.820019	5.96636e-08	3
YPL180W	TCO89	-2.03839	0.123077	6.60518e-08	3
YHR067W	HTD2	-2.03075	0.816047	7.12796e-08	3
YFR005C	SAD1	-2.02765	0.62179	7.31109e-08	3
YOL145C	CTR9	-2.02017	1.58418	7.88868e-08	3
YER061C	CEM1	-2.01215	0.586539	8.72905e-08	3
YKL063C		-2.00986	1.19132	8.95252e-08	3
YGR063C	SPT4	-2.00515	0.414292	9.18163e-08	3
YGR263C	SAY1	-2.64092	0.330188	1.27066e-07	2
YNL119W	NCS2	-1.96107	0.0791419	1.4443e-07	3
YCL005W-A	VMA9	-2.61992	1.62323	1.51931e-07	2
YMR242C	RPL20A	-1.95116	0.252888	1.59652e-07	3
YGL066W	SGF73	-1.9429	0.254797	1.72093e-07	3
YJL121C	RPE1	-1.93708	0.189687	1.85487e-07	3
YNL120C		-1.9253	0.218088	2.0495e-07	3
YNL068C	FKH2	-1.90697	0.126047	2.50093e-07	3
YLR363W-A		-1.90073	0.313798	2.62827e-07	3
YFL018C	LPD1	-1.89724	0.0161184	2.76198e-07	3
YGL246C	RAI1	-1.89313	0.746037	2.83131e-07	3
YBR035C	PDX3	-1.88695	0.197073	3.04975e-07	3
YFR030W	MET10	-1.88232	0.434001	3.2045e-07	3
YAR003W	SWD1	-1.87468	0.314383	3.45119e-07	3
YML113W	DAT1	-1.87036	0.265227	3.53749e-07	3
YPR123C		-1.86166	0.41322	3.90442e-07	3
YPR153W		-1.85972	0.340782	4.00184e-07	3
YDR045C	RPC11	-1.85254	0.15851	4.20391e-07	3
YNL301C	RPL18B	-1.8462	0.812316	4.52594e-07	3
YGL070C	RPB9	-1.84226	0.132716	4.75396e-07	3
YJR065C	ARP3	-1.8397	0.155948	4.87216e-07	3
YGR160W		-1.83467	1.02906	5.11729e-07	3
YOR294W	RRS1	-1.83234	0.0494153	5.24435e-07	3
YMR243C	ZRC1	-1.83176	0.553498	5.24435e-07	3
YPR197C		-1.82545	0.503963	5.50784e-07	3
YER129W	SAK1	-1.82538	0.401626	5.50784e-07	3
YDR079C-A	TFB5	-2.43772	1.02894	6.0461e-07	2
YBR084C-A	RPL19A	-1.81003	0.693195	6.37873e-07	3
YIR033W	MGA2	-2.41556	0.348404	7.14284e-07	2
YEL053C	MAK10	-1.79477	0.758327	7.5664e-07	3
YGL080W	FMP37	-1.79085	0.17829	7.75288e-07	3
YPL050C	MNN9	-1.78829	1.13818	7.94386e-07	3
YLR345W		-1.77097	0.0634489	9.41609e-07	3
YNL069C	RPL16B	-1.77001	0.49667	9.41609e-07	3
YPR043W	RPL43A	-1.76605	1.85017	9.88374e-07	3
YDR448W	ADA2	-1.76575	1.64731	9.88374e-07	3
YKL162C		-1.75056	1.38593	1.14274e-06	3
YDL133W		-1.75018	0.590578	1.14274e-06	3
YOR083W	WHI5	-1.74922	0.938179	1.17067e-06	3
YLR056W	ERG3	-1.74309	0.709795	1.22854e-06	3
YPR189W	SKI3	-1.73969	0.406749	1.28921e-06	3
YOR096W	RPS7A	-2.33448	0.629613	1.30196e-06	2
YDL029W	ARP2	-1.73401	0.112039	1.35281e-06	3
YDR404C	RPB7	-1.73318	0.372827	1.35281e-06	3
YER176W	ECM32	-1.73026	0.106792	1.38574e-06	3
YDR069C	DOA4	-1.72961	1.50146	1.41947e-06	3
YGR269W		-2.31892	0.523338	1.44952e-06	2
YMR010W		-1.71667	0.332672	1.6005e-06	3
YJL095W	BCK1	-1.7069	1.02354	1.7614e-06	3
YLR221C	RSA3	-2.27498	1.46763	1.99394e-06	2
YNL067W	RPL9B	-1.69124	0.24572	2.03277e-06	3
YGL158W	RCK1	-1.68673	0.26036	2.13199e-06	3
YOR283W		-1.68174	0.369654	2.23593e-06	3
YMR203W	TOM40	-1.68143	0.445352	2.23593e-06	3
YJL120W		-1.67989	0.288591	2.28974e-06	3
YLR151C	PCD1	-1.6689	1.24579	2.5179e-06	3
YCL005W	LDB16	-2.23514	1.81801	2.59159e-06	2
YGR072W	UPF3	-1.66317	0.121423	2.64014e-06	3
YLR448W	RPL6B	-1.66185	0.774163	2.70342e-06	3
YER179W	DMC1	-1.65958	1.43937	2.76817e-06	3
YOR138C	RUP1	-1.65943	1.18745	2.76817e-06	3
YGL148W	ARO2	-2.22118	0.523847	2.87558e-06	2
YBL071W-A	KTI11	-1.65134	0.869434	2.97162e-06	3
YDL100C	GET3	-1.63797	0.234905	3.34353e-06	3
YPL134C	ODC1	-1.63737	0.409565	3.42317e-06	3
YBR255W	MTC4	-1.63464	0.0227267	3.50465e-06	3
YHR149C	SKG6	-2.17709	0.435871	3.91687e-06	2
YMR172W	HOT1	-1.62194	0.619894	3.94125e-06	3
YJR011C		-1.61803	3.12079	4.03471e-06	3
YOL097W-A		-1.61656	0.613483	4.13032e-06	3
YER175C	TMT1	-1.61536	0.443865	4.13032e-06	3
YIL102C		-1.61408	0.297938	4.22814e-06	3
YKL009W	MRT4	-1.60985	0.323197	4.43057e-06	3
YLR021W	IRC25	-1.60836	0.135415	4.43057e-06	3
YPL196W	OXR1	-1.60329	0.239201	4.64242e-06	3
YCR086W	CSM1	-1.60114	0.580419	4.75201e-06	3
YNL139C	THO2	-1.58097	0.380884	5.72395e-06	3
YMR171C	EAR1	-1.57632	0.7513	5.99561e-06	3
YKL098W	MTC2	-1.57346	0.799645	6.13608e-06	3
YKL077W		-1.56608	0.89837	6.57696e-06	3
YLR389C	STE23	-1.56092	0.644049	6.88779e-06	3
YPR114W		-1.5536	0.47041	7.38092e-06	3
YOR385W		-1.54838	1.30071	7.72851e-06	3
YLR337C	VRP1	-1.54283	0.0168518	8.09196e-06	3
YLR447C	VMA6	-1.53585	0.342265	8.66836e-06	3
YDL117W	CYK3	-1.53377	0.472229	8.86919e-06	3
YBL067C	UBP13	-1.52797	0.225119	9.28447e-06	3
YMR242W-A		-1.52771	0.626219	9.28447e-06	3
YJL008C	CCT8	-1.52718	0.0694421	9.49911e-06	3
YMR016C	SOK2	-1.49863	0.255396	1.22011e-05	3
YIL123W	SIM1	-1.49209	0.386616	1.30586e-05	3
YOR043W	WHI2	-1.48907	0.835403	1.33572e-05	3
YDR034C	LYS14	-1.48251	0.40985	1.39743e-05	3
YPR016C	TIF6	-1.48056	0.343446	1.42932e-05	3
YOR025W	HST3	-1.47906	1.41335	1.4619e-05	3
YDR202C	RAV2	-1.47104	0.144424	1.56403e-05	3
YHR033W		-1.45997	0.345664	1.74976e-05	3
YMR274C	RCE1	-1.45863	0.191255	1.74976e-05	3
YKL178C	STE3	-1.45705	1.04492	1.78938e-05	3
YGL202W	ARO8	-1.45024	0.199131	1.87125e-05	3
YKR010C	TOF2	-1.4495	0.279019	1.91353e-05	3
YIL152W		-1.4494	0.58129	1.91353e-05	3
YNL108C		-1.44743	0.327771	1.95674e-05	3
YOR299W	BUD7	-1.44313	0.829147	2.00088e-05	3
YLR427W	MAG2	-1.4415	0.277363	2.04599e-05	3
YLR150W	STM1	-1.42888	0.398189	2.28669e-05	3
YNR025C		-1.42578	0.808585	2.33801e-05	3
YHR066W	SSF1	-1.42261	0.160991	2.39044e-05	3
YPL193W	RSA1	-1.90058	0.292098	2.39375e-05	2
YLR089C	ALT1	-1.42188	0.608357	2.44401e-05	3
YIL085C	KTR7	-1.41888	0.41436	2.49874e-05	3
YGR252W	GCN5	-1.89158	0.220697	2.55176e-05	2
YER135C		-1.41359	0.280221	2.61178e-05	3
YIL128W	MET18	-1.40934	0.662483	2.72975e-05	3
YDR498C	SEC20	-1.40499	0.280301	2.85287e-05	3
YDR290W		-1.87016	0.293329	2.899e-05	2
YBL072C	RPS8A	-1.39819	0.555489	2.98135e-05	3
YKL129C	MYO3	-1.86698	0.497924	2.9928e-05	2
YDR095C		-1.3973	0.760361	3.04767e-05	3
YML007C-A		-1.39565	0.220556	3.04767e-05	3
YJR107W		-1.38549	0.332996	3.32751e-05	3
YPR131C	NAT3	-1.38195	0.972042	3.47659e-05	3
YNL332W	THI12	-1.38146	1.08785	3.47659e-05	3
YIL110W	MNI1	-1.378	0.190615	3.55354e-05	3
YPR060C	ARO7	-1.36887	1.43692	3.87812e-05	3
YPL037C	EGD1	-1.36564	0.658112	3.96364e-05	3
YIR024C		-1.81869	0.102731	4.04656e-05	2
YDR137W	RGP1	-1.36455	0.332118	4.05099e-05	3
YOR293W	RPS10A	-1.35213	0.789192	4.51643e-05	3
YJL178C	ATG27	-1.35154	0.537793	4.51643e-05	3
YPR185W	ATG13	-1.34926	0.11819	4.61554e-05	3
YGR271C-A	EFG1	-1.3487	1.92252	4.61554e-05	3
YOL052C-A	DDR2	-1.34234	0.198785	4.92568e-05	3
YML111W	BUL2	-1.33826	0.457021	5.03347e-05	3
YIR004W	DJP1	-1.33293	0.111214	5.25595e-05	3
YIL133C	RPL16A	-1.77541	0.240666	5.29478e-05	2
YOR325W		-1.33225	0.502679	5.37074e-05	3
YGL029W	CGR1	-1.32571	0.397392	5.60765e-05	3
YLR449W	FPR4	-1.32552	0.383977	5.60765e-05	3
YHR137W	ARO9	-1.32101	0.164211	5.85467e-05	3
YAL037C-A		-1.31801	0.273545	5.98211e-05	3
YNL190W		-1.31747	0.540208	6.11223e-05	3
YGL046W		-1.30848	0.430117	6.5193e-05	3
YGR085C	RPL11B	-1.30363	0.503984	6.80516e-05	3
YPR050C		-1.30308	0.585924	6.80516e-05	3
YGR200C	ELP2	-1.30015	0.365953	6.95262e-05	3
YOL046C		-1.29989	0.356234	7.10318e-05	3
YNR004W		-1.29609	0.560937	7.2569e-05	3
YER156C		-1.72533	0.112827	7.25875e-05	2
YFR025C	HIS2	-1.2921	0.416538	7.5741e-05	3
YBR021W	FUR4	-1.29083	0.245273	7.5741e-05	3
YJR082C	EAF6	-1.27635	0.34905	8.60867e-05	3
YGR107W		-1.2761	1.02261	8.60867e-05	3
YJL155C	FBP26	-1.27229	0.0964239	8.98312e-05	3
YDL081C	RPP1A	-1.27217	1.11279	8.98312e-05	3
YDR127W	ARO1	-1.2688	0.35301	9.17625e-05	3
YJL064W		-1.26862	0.272652	9.17625e-05	3
YOL162W		-1.25451	0.0617645	0.000104228	3
YBR191W	RPL21A	-1.25387	2.77625	0.000104228	3
YIR020C		-1.66972	0.671561	0.000104278	2
YKL199C		-1.65938	0.00079972	0.000111056	2
YFL002C	SPB4	-1.24276	0.120052	0.000113439	3
YCR063W	BUD31	-1.23797	0.311384	0.000118337	3
YGL215W	CLG1	-1.23749	1.17374	0.000120863	3
YLR429W	CRN1	-1.23482	0.222782	0.000123442	3
YPL038W-A		-1.23456	0.331134	0.000123442	3
YOR027W	STI1	-1.23403	0.505214	0.000123442	3
YKL039W	PTM1	-1.23356	0.593617	0.000123442	3
YMR305C	SCW10	-1.23058	0.671265	0.000126074	3
YGL100W	SEH1	-1.23056	0.205219	0.000126074	3
YLR446W		-1.2256	0.147478	0.000131505	3
YOL104C	NDJ1	-1.22541	0.214868	0.000131505	3
YLR436C	ECM30	-1.63067	0.174567	0.000132056	2
YHR077C	NMD2	-1.22455	0.209514	0.000134305	3
YJL213W		-1.22054	0.408045	0.000137163	3
YPR188C	MLC2	-1.21888	0.099938	0.000140081	3
YBR175W	SWD3	-1.21731	0.487498	0.000143059	3
YGL045W	RIM8	-1.21461	0.585786	0.0001461	3
YJR039W		-1.21443	0.285891	0.0001461	3
YDR024W	FYV1	-1.21291	0.780896	0.0001461	3
YMR312W	ELP6	-1.21117	0.614242	0.000149203	3
YOR165W	SEY1	-1.60955	1.33552	0.00015216	2
YKL114C	APN1	-1.60898	0.489964	0.00015216	2
YGL078C	DBP3	-1.20789	0.125961	0.000152371	3
YCL010C	SGF29	-1.20773	0.569391	0.000152371	3
YOL103W	ITR2	-1.19806	0.381684	0.000165715	3
YPR074C	TKL1	-1.19653	0.252563	0.000169225	3
YMR175W-A		-1.19453	0.153538	0.000172809	3
YNL067W-B		-1.19216	0.126881	0.000176467	3
YOL119C	MCH4	-1.18633	0.50341	0.000184012	3
YJR146W		-1.18481	0.250937	0.000187902	3
YJR094W-A	RPL43B	-1.18201	0.317748	0.000191873	3
YNL014W	HEF3	-1.18144	0.615027	0.000191873	3
YOL005C	RPB11	-1.17766	0.180016	0.000195926	3
YIR001C	SGN1	-1.17757	0.134349	0.000195926	3
YLL045C	RPL8B	-1.17705	0.315636	0.000200063	3
YMR231W	PEP5	-1.1767	0.353601	0.000200063	3
YGR043C	NQM1	-1.56499	0.872462	0.000202024	2
YGR034W	RPL26B	-1.5534	0.554447	0.000215159	2
YGL186C	TPN1	-1.16744	0.26936	0.000217487	3
YNR022C	MRPL50	-1.16224	0.535039	0.00022675	3
YLR363C	NMD4	-1.1569	0.626343	0.0002364	3
YGR040W	KSS1	-1.15343	0.689668	0.000241375	3
YJL006C	CTK2	-1.14791	0.310998	0.000251637	3
YIL135C	VHS2	-1.52659	1.05055	0.000255851	2
YPL051W	ARL3	-1.14724	0.204116	0.000256927	3
YGL088W		-1.13656	0.976321	0.000279207	3
YGR035W-A		-1.13651	0.639802	0.000279207	3
YDR538W	PAD1	-1.13597	0.171871	0.000279207	3
YMR272W-B		-1.13552	0.263916	0.000279207	3
YER132C	PMD1	-1.133	0.253412	0.000285068	3
YLR410W	VIP1	-1.13194	0.65419	0.00029105	3
YNL041C	COG6	-1.1315	0.489071	0.00029105	3
YGL141W	HUL5	-1.12756	0.21656	0.000297156	3
YJR058C	APS2	-1.12387	0.19436	0.000309749	3
YLR225C		-1.49315	0.87147	0.000313952	2
YER177W	BMH1	-1.12168	0.45883	0.000316241	3
YNL290W	RFC3	-1.11843	1.94102	0.000322868	3
YIL158W		-1.11806	0.680881	0.000322868	3
YNL231C	PDR16	-1.11631	0.0932076	0.000329631	3
YGR054W		-1.11609	0.436153	0.000329631	3
YER137C		-1.11438	0.500378	0.000336534	3
YER108C		-1.11287	0.419826	0.000336534	3
YML021C	UNG1	-1.10923	0.429131	0.000350771	3
YNL307C	MCK1	-1.10641	0.135728	0.000358111	3
YDR239C		-1.10428	0.237822	0.000365603	3
YER081W	SER3	-1.10268	1.09638	0.000365603	3
YHR136C	SPL2	-1.10026	0.620527	0.000373249	3
YOR258W	HNT3	-1.46085	0.500162	0.000385183	2
YIL132C	CSM2	-1.09736	0.688409	0.000389019	3
YGR122W		-1.0921	0.274993	0.000405446	3
YER044C	ERG28	-1.0895	0.232455	0.000413915	3
YDR261C	EXG2	-1.44861	0.0452585	0.00041667	2
YGL261C		-1.08351	0.28874	0.00043138	3
YER101C	AST2	-1.44169	0.0444795	0.000436773	2
YGL127C	SOH1	-1.44165	1.08728	0.000436773	2
YGL004C	RPN14	-1.08236	0.286116	0.000440384	3
YDL114W		-1.08099	0.658515	0.000440384	3
YGL034C		-1.08005	0.281985	0.000440384	3
YML117W	NAB6	-1.07911	0.360109	0.000449574	3
YLL047W		-1.07502	0.578688	0.000458954	3
YIL137C	TMA108	-1.43156	0.346434	0.00046508	2
YPR101W	SNT309	-1.42899	2.22229	0.000472436	2
YCR047C	BUD23	-1.42692	1.26501	0.000479907	2
YOR338W		-1.0689	0.880488	0.000488268	3
YMR110C	HFD1	-1.06817	0.176052	0.000488268	3
YNR002C	ATO2	-1.06722	0.564702	0.000498446	3
YKR090W	PXL1	-1.06113	0.323369	0.000519434	3
YDR203W		-1.05908	0.221389	0.000530254	3
YOR072W		-1.05874	0.371663	0.000530254	3
YOR010C	TIR2	-1.05812	1.57668	0.000530254	3
YML058C-A		-1.05806	0.0965094	0.000530254	3
YBR260C	RGD1	-1.05664	0.33707	0.000541296	3
YJL200C	ACO2	-1.055	0.227546	0.000541296	3
YHL003C	LAG1	-1.05387	0.714886	0.000552566	3
YMR070W	MOT3	-1.40428	0.0945701	0.000552621	2
YLR209C	PNP1	-1.40207	1.40909	0.000561342	2
YBR299W	MAL32	-1.04936	0.366941	0.000575807	3
YJL077C	ICS3	-1.04712	0.393391	0.000587788	3
YEL009C	GCN4	-1.04595	0.261119	0.000587788	3
YFL016C	MDJ1	-1.39268	0.670755	0.00058833	2
YKL071W		-1.3925	0.876294	0.00058833	2
YKR103W	NFT1	-1.04354	0.661031	0.000600016	3
YKR039W	GAP1	-1.04289	0.139227	0.000600016	3
YDR035W	ARO3	-1.04102	0.253943	0.000612495	3
YBR114W	RAD16	-1.04068	0.235556	0.000612495	3
YLR236C		-1.04049	0.217138	0.000612495	3
YJR096W		-1.03455	0.161007	0.000651493	3
YJR084W	CSN12	-1.03444	0.240525	0.000651493	3
YBR028C		-1.03206	0.883497	0.000665031	3
YEL033W	MTC7	-1.03204	1.07386	0.000665031	3
YGL214W		-1.03119	0.483552	0.000665031	3
YIR026C	YVH1	-1.37327	0.311776	0.000666694	2
YLR454W	FMP27	-1.02915	0.793275	0.000678847	3
YML024W	RPS17A	-1.02874	0.26216	0.000678847	3
YNR035C	ARC35	-1.02864	0.0607608	0.000678847	3
YBR174C		-1.02753	0.301898	0.000678847	3
YPR049C	ATG11	-1.36794	0.477927	0.000687835	2
YDR302W	GPI11	-1.02292	0.370749	0.000707337	3
YKR034W	DAL80	-1.02179	0.643295	0.000722022	3
YBR145W	ADH5	-1.02176	0.135813	0.000722022	3
YLR121C	YPS3	-1.01862	0.0955993	0.000737009	3
YMR186W	HSC82	-1.01847	0.540972	0.000737009	3
YGL140C		-1.01658	0.391641	0.000752304	3
YKR092C	SRP40	-1.01458	0.416148	0.000767913	3
YOL045W	PSK2	-1.01408	0.201169	0.000767913	3
YEL007W		-1.01294	0.971997	0.000767913	3
YAL067C	SEO1	-1.01272	0.268223	0.000767913	3
YBR221C	PDB1	-1.34852	1.04627	0.000779167	2
YDR056C		-1.00739	0.319954	0.000816686	3
YDR167W	TAF10	-1.00558	0.337267	0.000816686	3
YPR058W	YMC1	-1.00277	0.102402	0.000833614	3
YLR309C	IMH1	-1.00091	0.1214	0.00085089	3
YPL077C		-0.999796	0.274458	0.00086852	3
YDL012C		-0.998181	0.545998	0.00086852	3
YNL294C	RIM21	-0.997159	0.533457	0.00088651	3
YOL077C	BRX1	-0.993257	0.196679	0.000904869	3
YMR154C	RIM13	-0.99057	0.337881	0.000923603	3
YKL142W	MRP8	-1.3194	1.54744	0.00093877	2
YMR209C		-0.986363	0.34493	0.000962229	3
YDL184C	RPL41A	-0.984896	1.09592	0.000982136	3
YDL074C	BRE1	-0.984857	0.416777	0.000982136	3
YNL215W	IES2	-0.98475	0.341627	0.000982136	3
YHR081W	LRP1	-0.983886	0.257334	0.000982136	3

## Sheet: all single mutants in 1 mM Pi
Gene_systematic name	Gene_generic name	average_log2(YFP/RFP) (0=wild type in 1mM Pi)	standard deviation_log2(YFP/RFP)	p-value of measurement errors	detected number
YPL031C	PHO85	7.46017	0.223107	0	3
YOL001W	PHO80	7.43813	0.387352	0	2
YJR105W	ADO1	5.53564	0.279153	1.04291e-266	2
YDR226W	ADK1	5.51916	0.699749	0	3
YPR007C	REC8	4.46716	3.96082	3.97944e-261	3
YNL141W	AAH1	3.91567	0.246864	1.00612e-201	3
YJL198W	PHO90	3.8273	0.812436	9.59688e-193	3
YMR060C	SAM37	2.65546	1.73763	5.73597e-95	3
YOR187W	TUF1	2.53546	0.196907	6.27088e-87	3
YKR084C	HBS1	2.51285	0.105184	1.39127e-57	2
YOR200W		2.4196	0.150331	2.04243e-79	3
YIL018W	RPL2B	2.26637	0.971147	3.40504e-70	3
YJL101C	GSH1	2.12929	0.955742	3.52343e-42	2
YBL006C	LDB7	1.96512	0.947861	1.94345e-36	2
YCR024C	SLM5	1.83512	0.641124	2.09415e-47	3
YER087W		1.80929	0.642156	4.1411e-46	3
YCR037C	PHO87	1.65325	0.938544	3.63159e-39	3
YKL204W	EAP1	1.36823	0.0193304	3.39462e-19	2
YIL030C	SSM4	1.36698	2.46223	6.46175e-28	3
YDR159W	SAC3	1.3445	0.0532078	3.99645e-27	3
YIL058W		1.30007	2.1151	1.15118e-25	3
YNL080C	EOS1	1.23197	0.0452176	4.36741e-16	2
YHL020C	OPI1	1.22902	0.194859	2.78285e-23	3
YOL072W	THP1	1.22372	0.333214	4.01716e-23	3
YBR077C	SLM4	1.17151	2.31844	1.73571e-21	3
YDR244W	PEX5	1.10299	0.0687756	1.72933e-13	2
YPL179W	PPQ1	1.09774	0.0369407	2.15853e-13	2
YML062C	MFT1	1.09322	0.0407771	3.35464e-19	3
YIL020C	HIS6	1.06616	0.0305404	8.90672e-13	2
YOR340C	RPA43	1.03599	0.0553818	1.32792e-17	3
YPR022C		1.03553	0.403526	1.32792e-17	3
YNR052C	POP2	1.03418	0.767486	1.5514e-17	3
YIL043C	CBR1	1.01432	0.16236	8.06381e-12	2
YNR024W	MPP6	1.01071	2.01164	6.18821e-17	3
YPR110C	RPC40	0.993732	0.13858	1.77832e-16	3
YAL021C	CCR4	0.935338	0.205759	1.71555e-10	2
YDR363W-A	SEM1	0.924041	0.226091	1.01442e-14	3
YHR183W	GND1	0.885431	0.309801	1.0907e-09	2
YGL054C	ERV14	0.854761	0.315107	4.35181e-13	3
YGR164W		0.832846	0.815074	1.2091e-12	3
YBL103C	RTG3	0.808297	0.0485677	1.58631e-08	2
YOR136W	IDH2	0.79613	0.305091	7.72097e-12	3
YDR028C	REG1	0.790482	0.0516463	2.81262e-08	2
YNL037C	IDH1	0.787219	0.238259	1.24883e-11	3
YOR322C	LDB19	0.786584	0.296437	1.24883e-11	3
YNL076W	MKS1	0.779632	0.186986	1.78448e-11	3
YLR140W		0.775754	0.0128675	4.55267e-08	2
YER091C	MET6	0.772102	0.257502	2.54177e-11	3
YNL280C	ERG24	0.771347	0.056693	2.54177e-11	3
YOR246C		0.757565	0.141485	4.55121e-11	3
YML035C	AMD1	0.751241	1.33848	6.42834e-11	3
YNL229C	URE2	0.742155	0.504348	1.01379e-10	3
YIL153W	RRD1	0.738632	0.168278	1.1351e-10	3
YOL002C	IZH2	0.735699	0.141094	1.2705e-10	3
YOR199W		0.716271	0.276018	3.09126e-10	3
YPL055C	LGE1	0.714379	0.352915	3.4494e-10	3
YLR015W	BRE2	0.699475	0.100626	6.61225e-10	3
YNL220W	ADE12	0.694734	0.174858	8.19225e-10	3
YKL053W		0.68514	0.184544	1.12699e-09	3
YHL015W	RPS20	0.679926	0.302784	1.5459e-09	3
YCR062W		0.664137	0.731701	2.88393e-09	3
YKL139W	CTK1	0.663722	0.0421843	1.28675e-06	2
YDR497C	ITR1	0.65897	1.48896	3.54139e-09	3
YOR070C	GYP1	0.655069	0.241032	3.92255e-09	3
YNL147W	LSM7	0.648519	0.164811	5.32069e-09	3
YNL089C		0.62358	0.263435	1.44225e-08	3
YOR242C	SSP2	0.618942	0.114352	1.75462e-08	3
YIR037W	HYR1	0.604915	0.0230292	6.33293e-06	2
YNR047W	FPK1	0.59989	0.454318	3.80308e-08	3
YGL252C	RTG2	0.593973	0.239112	4.60266e-08	3
YBR173C	UMP1	0.575214	0.36023	8.90742e-08	3
YLR264C-A		0.56702	0.174095	1.29239e-07	3
YGR017W		0.56557	0.343035	1.29239e-07	3
YBR215W	HPC2	0.565072	0.0352885	1.29239e-07	3
YOR038C	HIR2	0.559923	0.153699	1.70461e-07	3
YLR148W	PEP3	0.551293	0.0110048	2.31902e-05	2
YFL022C	FRS2	0.541871	0.0619824	3.22839e-07	3
YOR046C	DBP5	0.531744	0.0486959	4.62994e-07	3
YGL014W	PUF4	0.530486	0.309805	4.62994e-07	3
YLR039C	RIC1	0.528726	0.0434865	5.06425e-07	3
YLR418C	CDC73	0.527288	0.0854015	5.53824e-07	3
YPR099C		0.517006	0.354607	5.28333e-05	2
YGR259C		0.516294	0.236078	5.28333e-05	2
YOR106W	VAM3	0.51307	0.186963	8.63873e-07	3
YCL032W	STE50	0.512474	0.14642	9.43686e-07	3
YKL056C	TMA19	0.508825	0.192598	1.03069e-06	3
YGR240C	PFK1	0.497662	0.570001	1.46401e-06	3
YJR114W		0.494894	0.0987763	1.74297e-06	3
YPR133C	SPN1	0.490975	0.120483	9.36164e-05	2
YLR200W	YKE2	0.489533	0.0254633	9.9068e-05	2
YLR357W	RSC2	0.488572	0.240373	2.07361e-06	3
YGR018C		0.481062	0.344315	2.68723e-06	3
YGL023C	PIB2	0.479777	0.166525	2.9287e-06	3
YLR087C	CSF1	0.479638	0.246558	2.9287e-06	3
YBR131W	CCZ1	0.478679	0.375414	2.9287e-06	3
YGL001C	ERG26	0.476637	0.159035	3.19131e-06	3
YPR064W		0.471318	0.558228	3.78722e-06	3
YOR263C		0.471318	0.176189	3.78722e-06	3
YPL271W	ATP15	0.469325	0.226851	0.000155292	2
YER145C	FTR1	0.467707	0.267882	4.12456e-06	3
YOR256C	TRE2	0.463526	0.402576	0.00017362	2
YGL062W	PYC1	0.461315	0.166127	5.322e-06	3
YHR012W	VPS29	0.455494	0.304936	6.3019e-06	3
YOR255W	OSW1	0.454816	0.175513	6.85563e-06	3
YKL169C		0.454135	0.0963634	0.00021684	2
YDL224C	WHI4	0.452725	0.324993	6.85563e-06	3
YJR145C	RPS4A	0.45063	0.382116	7.4566e-06	3
YBR122C	MRPL36	0.449665	0.15598	8.10871e-06	3
YOL066C	RIB2	0.448172	0.151651	8.10871e-06	3
YGR204W	ADE3	0.445638	0.583732	8.81616e-06	3
YLR284C	ECI1	0.443833	0.334367	9.58347e-06	3
YBL094C		0.443726	0.129846	0.000270553	2
YIL034C	CAP2	0.442372	0.163925	0.000285905	2
YNL286W	CUS2	0.440082	0.179483	1.04155e-05	3
YFL033C	RIM15	0.438484	0.147485	0.000302111	2
YBL008W	HIR1	0.437502	0.120782	1.13176e-05	3
YGR257C	MTM1	0.435663	0.19591	0.000319221	2
YNL315C	ATP11	0.43245	0.638283	1.45029e-05	3
YLR349W		0.430308	0.301964	1.45029e-05	3
YLR348C	DIC1	0.427953	0.312179	1.57463e-05	3
YNL183C	NPR1	0.426888	0.28462	1.70928e-05	3
YGR118W	RPS23A	0.424847	0.235998	1.85506e-05	3
YKR040C		0.422779	0.100842	0.000420152	2
YMR061W	RNA14	0.422168	0.0411242	2.01286e-05	3
YLR239C	LIP2	0.41992	0.0723477	2.18362e-05	3
YJL138C	TIF2	0.419557	0.223991	2.18362e-05	3
YHR013C	ARD1	0.419077	0.0717334	0.000468812	2
YNR075W	COS10	0.418227	0.0489149	0.000468812	2
YGL003C	CDH1	0.417468	0.107365	0.000495185	2
YJL011C	RPC17	0.413209	0.0540507	2.56821e-05	3
YPL240C	HSP82	0.412269	0.375135	2.78431e-05	3
YDR186C		0.411615	0.0895376	2.78431e-05	3
YDR006C	SOK1	0.400671	0.111836	3.83818e-05	3
YOL059W	GPD2	0.400325	0.114115	3.83818e-05	3
YOR137C	SIA1	0.400147	0.258049	3.83818e-05	3
YOR277C		0.39888	0.0770603	4.15661e-05	3
YJL068C		0.397746	0.404589	4.15661e-05	3
YER124C	DSE1	0.397	0.134546	0.000766061	2
YOR126C	IAH1	0.396101	0.211831	4.50047e-05	3
YGL024W		0.395549	0.205231	4.50047e-05	3
YKL156W	RPS27A	0.39073	0.0311177	5.27236e-05	3
YOL063C	CRT10	0.388835	0.251005	5.70471e-05	3
YKL040C	NFU1	0.387198	0.0281307	6.17113e-05	3
YKL047W		0.384902	0.24651	6.6742e-05	3
YPR106W	ISR1	0.384868	0.0794385	6.6742e-05	3
YNL192W	CHS1	0.382997	0.0971287	6.6742e-05	3
YBR105C	VID24	0.382063	0.645341	7.21666e-05	3
YOR238W		0.381843	0.0808853	7.21666e-05	3
YLR438C-A	LSM3	0.37959	0.0695936	7.80146e-05	3
YJL096W	MRPL49	0.378514	0.366983	0.00111956	2
YJR087W		0.378343	0.0455826	7.80146e-05	3
YLR021W	IRC25	0.377782	0.327346	0.00111956	2
YKR004C-A		0.377091	0.088234	8.43176e-05	3
YGR081C	SLX9	0.374178	0.104999	9.11095e-05	3
YJR007W	SUI2	0.37129	0.0756756	9.84265e-05	3
YDR065W		0.369866	0.325285	0.00138897	2
YLR342W	FKS1	0.369164	0.278712	0.000106307	3
YOR111W		0.368359	0.0299415	0.000106307	3
YNL325C	FIG4	0.367425	0.0995795	0.000114794	3
YOR378W		0.367041	0.280532	0.000114794	3
YDR019C	GCV1	0.366595	0.0567017	0.000114794	3
YOR273C	TPO4	0.366318	0.265405	0.000114794	3
YJR113C	RSM7	0.365316	0.100808	0.000114794	3
YDL085W	NDE2	0.365196	0.318924	0.000114794	3
YOR124C	UBP2	0.364903	0.15715	0.000123931	3
YLR279W		0.363415	0.312425	0.000123931	3
YMR221C		0.35936	0.160153	0.000144348	3
YLR287-A		0.357989	0.330091	0.000144348	3
YKL061W		0.357566	0.0190868	0.000144348	3
YML001W	YPT7	0.357531	0.0908956	0.000144348	3
YGR092W	DBF2	0.354392	0.0973536	0.000167984	3
YPL138C	SPP1	0.353956	0.022278	0.000167984	3
YNL212W	VID27	0.353083	0.377469	0.000167984	3
YNL052W	COX5A	0.352286	0.443269	0.0020204	2
YMR189W	GCV2	0.351787	0.103826	0.000181158	3
YLR167W	RPS31	0.349334	0.0921267	0.000195323	3
YMR065W	KAR5	0.349109	0.0666189	0.00213082	2
YOL038W	PRE6	0.346908	0.259877	0.000210552	3
YHR021C	RPS27B	0.345077	0.131699	0.00224707	2
YDR009W	GAL3	0.344294	0.18157	0.000226921	3
YKL168C	KKQ8	0.343725	0.153162	0.000226921	3
YBR084W	MIS1	0.343354	0.157515	0.000226921	3
YDR463W	STP1	0.342893	0.60148	0.00236944	2
YOR233W	KIN4	0.342799	0.0688355	0.000226921	3
YFL004W	VTC2	0.342761	0.205296	0.000226921	3
YOR223W		0.342707	0.177481	0.000226921	3
YER064C		0.34223	0.115408	0.000244513	3
YPL139C	UME1	0.342199	0.0382395	0.000244513	3
YKL020C	SPT23	0.342037	0.0548498	0.000244513	3
YPL069C	BTS1	0.34082	0.232096	0.000244513	3
YJL053W	PEP8	0.340542	0.269918	0.000244513	3
YKL163W	PIR3	0.340533	0.147457	0.000244513	3
YNL096C	RPS7B	0.33996	0.208557	0.000263415	3
YER167W	BCK2	0.33773	0.152419	0.000263415	3
YFR030W	MET10	0.334527	0.699524	0.00292634	2
YBL001C	ECM15	0.333534	0.398192	0.000305533	3
YLR268W	SEC22	0.330727	0.305439	0.000328958	3
YER025W	GCD11	0.33068	0.09941	0.000328958	3
YGL028C	SCW11	0.330612	0.637226	0.000328958	3
YJL204C	RCY1	0.330085	0.192551	0.000328958	3
YBR121C	GRS1	0.329645	0.5782	0.000354111	3
YKL051W	SFK1	0.329549	0.0813791	0.000354111	3
YBR013C		0.329333	0.384432	0.000354111	3
YBR011C	IPP1	0.328398	0.0444112	0.000354111	3
YKL175W	ZRT3	0.328154	0.0767673	0.000354111	3
YDL170W	UGA3	0.32697	0.122504	0.000381116	3
YOR280C	FSH3	0.326393	0.157383	0.000381116	3
YIL032C		0.325773	0.0824601	0.00342431	2
YDR431W		0.323684	0.0231872	0.000410105	3
YER059W	PCL6	0.323311	0.125855	0.000410105	3
YGR220C	MRPL9	0.322712	0.483891	0.000410105	3
YJL067W		0.321366	0.32335	0.000441219	3
YPL068C		0.320542	0.227265	0.000441219	3
YLR317W		0.31809	0.0159124	0.000474609	3
YDR524C	AGE1	0.317361	0.138257	0.000510437	3
YDR399W	HPT1	0.316494	0.189149	0.000510437	3
YKL215C		0.316399	0.252568	0.000510437	3
YCR065W	HCM1	0.315134	0.0737714	0.000510437	3
YKL151C		0.314328	0.0897394	0.000548876	3
YDR446W	ECM11	0.313433	0.524668	0.000548876	3
YGL020C	GET1	0.312779	0.264662	0.000548876	3
YOR225W		0.312357	0.0749321	0.00059011	3
YMR202W	ERG2	0.312171	0.0815503	0.00059011	3
YPR040W	TIP41	0.309888	0.0998808	0.000634338	3
YER169W	RPH1	0.308845	0.130325	0.000634338	3
YKL043W	PHD1	0.308773	0.10289	0.000634338	3
YBL091C	MAP2	0.307653	0.313689	0.000634338	3
YOR108W	LEU9	0.3075	0.0836581	0.000634338	3
YDL086W		0.307494	0.445782	0.000681772	3
YGL005C	COG7	0.306542	0.031269	0.000681772	3
YKL050C		0.30599	0.0638124	0.000681772	3
YNL311C		0.305929	0.0836297	0.000681772	3
YNR032W	PPG1	0.305852	0.136995	0.000681772	3
YMR314W	PRE5	0.305562	0.529979	0.000681772	3
YJR140C	HIR3	0.304484	0.0772464	0.000732637	3
YJR077C	MIR1	0.304165	0.228714	0.000732637	3
YKL029C	MAE1	0.303818	0.167428	0.000732637	3
YPL257W		0.303597	0.251958	0.000732637	3
YLR289W	GUF1	0.303554	0.0826287	0.000732637	3
YGR023W	MTL1	0.302883	0.195113	0.000732637	3
YPR107C	YTH1	0.302801	0.00744552	0.000732637	3
YNL104C	LEU4	0.301532	0.308339	0.000787176	3
YOR264W	DSE3	0.301237	0.0770622	0.000787176	3
YGL107C	RMD9	0.299324	0.153044	0.000845647	3
YOR253W	NAT5	0.298952	0.0415602	0.000845647	3
YMR137C	PSO2	0.298654	0.303793	0.000845647	3
YNL058C		0.298019	0.301468	0.000845647	3
YKL167C	MRP49	0.297915	0.232945	0.000845647	3
YDR312W	SSF2	0.297479	0.0628963	0.00634135	2
YJL124C	LSM1	0.29742	0.194779	0.000908327	3
YLR283W		0.29425	0.168977	0.000975511	3
YOR281C	PLP2	0.293271	0.167907	0.000975511	3
YKL149C	DBR1	0.293095	0.0709336	0.000975511	3
YJL057C	IKS1	0.29122	0.323037	0.00104752	3
YHR166C	CDC23	0.29041	0.269234	0.00104752	3
YOR120W	GCY1	0.290109	0.131674	0.00104752	3
YKL179C	COY1	0.289379	0.0539808	0.00112468	3
YLR280C		0.288886	0.186424	0.00112468	3
YOR216C	RUD3	0.287814	0.0126752	0.00112468	3
YKL158W		0.287102	0.0936448	0.00120736	3
YOL018C	TLG2	0.287093	0.140249	0.00120736	3
YMR120C	ADE17	0.286662	0.312064	0.00120736	3
YGR275W	RTT102	0.285998	0.0753722	0.00774639	2
YCR020C	PET18	0.285907	0.245526	0.00120736	3
YOR243C	PUS7	0.285752	0.125986	0.00120736	3
YGL223C	COG1	0.284166	0.132304	0.00129595	3
YPL073C		0.283955	0.324654	0.00129595	3
YOR285W		0.283126	0.0749827	0.00129595	3
YDR252W	BTT1	0.282267	0.0777785	0.00855194	2
YLR332W	MID2	0.281609	0.10188	0.00139085	3
YER111C	SWI4	0.281256	0.157697	0.00139085	3
YOR279C	RFM1	0.280686	0.0788863	0.00139085	3
YKL053C-A	MDM35	0.280635	0.185238	0.00139085	3
YNL054W	VAC7	0.279708	0.227456	0.0014925	3
YOR207C	RET1	0.279674	0.180643	0.0014925	3
YDL052C	SLC1	0.278111	0.562028	0.0014925	3
YKR056W	TRM2	0.277791	0.00940904	0.00898292	2
YGR121C	MEP1	0.277163	0.0511379	0.00160137	3
YAL003W	EFB1	0.276883	0.0112518	0.00160137	3
YOL102C	TPT1	0.27647	0.128974	0.00160137	3
YLR266C	PDR8	0.276435	0.0840759	0.00160137	3
YMR135C	GID8	0.275566	0.340611	0.00160137	3
YHR059W	FYV4	0.27501	0.455335	0.00160137	3
YPL074W	YTA6	0.27493	0.261054	0.00171797	3
YOR131C		0.27485	0.0740435	0.00171797	3
YDR199W		0.274812	0.370672	0.00171797	3
YKL062W	MSN4	0.274694	0.153511	0.00171797	3
YOR239W	ABP140	0.274154	0.0516546	0.00171797	3
YIL023C	YKE4	0.27295	0.00577978	0.00990504	2
YFL063W		0.272471	0.12954	0.00184282	3
YNL140C		0.270999	0.657851	0.00184282	3
YKL161C		0.270639	0.0975253	0.00184282	3
YCL076W		0.26953	0.195306	0.00197649	3
YHR067W	HTD2	0.269164	0.0572646	0.0109126	2
YOR133W	EFT1	0.268649	0.0633682	0.00197649	3
YLR351C	NIT3	0.266919	0.171096	0.0114504	2
YDL149W	ATG9	0.266676	0.0653554	0.00211958	3
YOL009C	MDM12	0.266214	0.233457	0.0114504	2
YNL241C	ZWF1	0.266184	0.0184896	0.0114504	2
YLL018C-A	COX19	0.266096	0.509597	0.00211958	3
YBR171W	SEC66	0.265884	0.397555	0.00211958	3
YOR134W	BAG7	0.264432	0.0549054	0.00227274	3
YPL088W		0.264352	0.388732	0.00227274	3
YOR032C	HMS1	0.264088	0.143726	0.00227274	3
YKL057C	NUP120	0.26371	0.0735537	0.00227274	3
YKL007W	CAP1	0.262855	0.0555816	0.00227274	3
YGL197W	MDS3	0.262548	0.139594	0.00227274	3
YOR251C		0.262548	0.0659766	0.00227274	3
YNL127W	FAR11	0.262062	0.152192	0.00243666	3
YER091C-A		0.261728	0.0927748	0.00243666	3
YPL270W	MDL2	0.261355	0.0843808	0.00243666	3
YJR014W	TMA22	0.26066	0.0839869	0.00243666	3
YMR313C	TGL3	0.259781	0.288359	0.00261206	3
YKR001C	VPS1	0.258265	0.0111284	0.0132104	2
YMR158W	MRPS8	0.257129	0.530322	0.0138488	2
YMR274C	RCE1	0.256958	0.0188227	0.00279971	3
YOR121C		0.256756	0.0591074	0.00279971	3
YER086W	ILV1	0.256101	0.0416639	0.00279971	3
YCR079W	PTC6	0.255663	0.153369	0.00279971	3
YMR241W	YHM2	0.255382	0.139415	0.00279971	3
YMR311C	GLC8	0.25462	0.0261862	0.00300045	3
YDR372C	VPS74	0.254546	0.0685479	0.00300045	3
YGL198W	YIP4	0.253574	0.243009	0.00300045	3
YNL055C	POR1	0.253557	0.0839277	0.00300045	3
YDR381W	YRA1	0.253497	0.164157	0.00300045	3
YER040W	GLN3	0.251216	0.0905232	0.00321515	3
YGL108C		0.25094	0.283633	0.00321515	3
YNR074C	AIF1	0.25089	0.0187958	0.0152088	2
YML016C	PPZ1	0.250795	0.0637962	0.00321515	3
YKR005C		0.250727	0.017625	0.0152088	2
YDR237W	MRPL7	0.250469	0.294513	0.00321515	3
YKR101W	SIR1	0.250442	0.0314622	0.00321515	3
YJL121C	RPE1	0.249838	0.11405	0.0159324	2
YKL177W		0.249632	0.124775	0.00344473	3
YKL159C	RCN1	0.249112	0.0566209	0.00344473	3
YPR149W	NCE102	0.24897	0.22996	0.00344473	3
YLR329W	REC102	0.248908	0.155777	0.00344473	3
YKL170W	MRPL38	0.2483	0.00427098	0.0159324	2
YLR382C	NAM2	0.247699	0.121795	0.00344473	3
YDL223C	HBT1	0.247619	0.0665491	0.00344473	3
YAL012W	CYS3	0.247021	0.0368301	0.0166862	2
YNL051W	COG5	0.246874	0.0615605	0.00369018	3
YHR001W	OSH7	0.246652	0.14203	0.00369018	3
YAL013W	DEP1	0.246477	0.125535	0.00369018	3
YJL016W		0.246316	0.221368	0.00369018	3
YIL092W		0.245062	0.0109337	0.0166862	2
YOR245C	DGA1	0.244903	0.0216925	0.00395254	3
YJL131C		0.244887	0.258648	0.00395254	3
YOL139C	CDC33	0.244687	0.333605	0.00395254	3
YPL123C	RNY1	0.244536	0.0309288	0.00395254	3
YDR223W	CRF1	0.24402	0.266854	0.00395254	3
YJL046W		0.243475	0.18454	0.00395254	3
YLR218C		0.243466	0.139389	0.00395254	3
YGL147C	RPL9A	0.243116	0.113867	0.00395254	3
YER122C	GLO3	0.242628	0.230113	0.00395254	3
YKL016C	ATP7	0.242376	0.141764	0.00423293	3
YNL097C	PHO23	0.242293	0.00828041	0.0182888	2
YGR152C	RSR1	0.241685	0.0642734	0.00423293	3
YDL165W	CDC36	0.24113	0.0291686	0.00423293	3
YDR291W	HRQ1	0.240075	0.0341611	0.0182888	2
YDR156W	RPA14	0.239768	0.0753915	0.0045325	3
YLR270W	DCS1	0.239699	0.321375	0.0191396	2
YGR096W	TPC1	0.2391	0.169796	0.0045325	3
YGL072C		0.239085	0.054473	0.0045325	3
YER112W	LSM4	0.238782	0.0131838	0.0045325	3
YPL067C		0.238729	0.248035	0.0045325	3
YFL018C	LPD1	0.238641	0.163077	0.0045325	3
YPR084W		0.238423	0.106478	0.0045325	3
YHL023C	RMD11	0.237973	0.0513959	0.0191396	2
YNR033W	ABZ1	0.237936	0.130638	0.0045325	3
YLR326W		0.237741	0.156233	0.0045325	3
YBR221C	PDB1	0.237667	0.0921259	0.0045325	3
YOL149W	DCP1	0.237253	0.0383789	0.00485251	3
YHR030C	SLT2	0.236489	0.0708176	0.00485251	3
YDR373W	FRQ1	0.235727	0.0301328	0.00485251	3
YNL146W		0.235188	0.177052	0.0200248	2
YOR310C	NOP58	0.23471	0.168019	0.00519426	3
YOR176W	HEM15	0.233527	0.192562	0.00519426	3
YOR333C		0.23341	0.520192	0.00519426	3
YOR237W	HES1	0.233094	0.144559	0.00519426	3
YOR061W	CKA2	0.232901	0.311515	0.00519426	3
YBR120C	CBP6	0.232789	0.248113	0.00519426	3
YER158C		0.232643	0.170593	0.00519426	3
YML069W	POB3	0.232613	0.283379	0.00519426	3
YKL147C		0.232454	0.0721543	0.00555913	3
YCR047C	BUD23	0.23232	0.0156947	0.0219026	2
YGL175C	SAE2	0.232268	0.158361	0.00555913	3
YLR341W	SPO77	0.232188	0.156985	0.00555913	3
YDR511W	ACN9	0.231971	0.195743	0.00555913	3
YMR198W	CIK1	0.231821	0.00137532	0.0219026	2
YGR131W		0.231569	0.106709	0.00555913	3
YIR023W	DAL81	0.230896	0.183927	0.00555913	3
YKL026C	GPX1	0.230656	0.156819	0.00555913	3
YLR257W		0.230543	0.174196	0.00555913	3
YKR103W	NFT1	0.22983	0.0356089	0.00594858	3
YGL195W	GCN1	0.229628	0.316716	0.00594858	3
YMR037C	MSN2	0.229356	0.117997	0.00594858	3
YLR333C	RPS25B	0.228824	0.196047	0.00594858	3
YOL038C-A		0.228422	0.105707	0.00594858	3
YLR271W		0.227811	0.127974	0.00594858	3
YPR130C		0.227738	0.120542	0.00594858	3
YBR289W	SNF5	0.227628	0.199794	0.00594858	3
YDR010C		0.227243	0.0921786	0.00636415	3
YKL123W		0.227226	0.104949	0.00636415	3
YGR136W	LSB1	0.227065	0.161956	0.00636415	3
YDR233C	RTN1	0.226629	0.282457	0.00636415	3
YBL066C	SEF1	0.226375	0.151751	0.00636415	3
YKR099W	BAS1	0.225888	0.118499	0.00636415	3
YCR107W	AAD3	0.225358	0.0175062	0.00636415	3
YLR031W		0.225072	0.0975984	0.00636415	3
YNL021W	HDA1	0.224465	0.135045	0.00680746	3
YIR032C	DAL3	0.22435	0.209266	0.00680746	3
YOR248W		0.224159	0.0955563	0.00680746	3
YOR341W	RPA190	0.222799	0.0587575	0.00680746	3
YNL283C	WSC2	0.22232	0.339706	0.00728022	3
YOR260W	GCD1	0.222181	0.0280468	0.00728022	3
YNL339C	YRF1-6	0.222016	0.117031	0.00728022	3
YLR269C		0.221617	0.193995	0.00728022	3
YER097W		0.221603	0.161393	0.00728022	3
YLR324W	PEX30	0.221589	0.149373	0.00728022	3
YKL027W		0.221536	0.0513134	0.00728022	3
YKR048C	NAP1	0.221405	0.106761	0.0261189	2
YMR219W	ESC1	0.221259	0.0526822	0.00728022	3
YGR255C	COQ6	0.221031	0.304481	0.00728022	3
YPR160W	GPH1	0.221027	0.161482	0.00728022	3
YPL072W	UBP16	0.220534	0.21508	0.00728022	3
YFR048W	RMD8	0.219929	0.0297415	0.00778422	3
YDR184C	ATC1	0.219256	0.0376824	0.00778422	3
YNL011C		0.219155	0.116563	0.00778422	3
YBR012C		0.218316	0.154134	0.00778422	3
YGR276C	RNH70	0.21827	0.195377	0.00778422	3
YPL117C	IDI1	0.218202	0.0413805	0.00778422	3
YJL140W	RPB4	0.218087	0.0880752	0.00778422	3
YDR390C	UBA2	0.217811	0.190884	0.00778422	3
YOR145C	PNO1	0.217592	0.0445077	0.00778422	3
YNR048W		0.217587	0.347276	0.00778422	3
YOR115C	TRS33	0.217375	0.181676	0.00832134	3
YFL012W		0.217311	0.133365	0.00832134	3
YJR009C	TDH2	0.217295	0.20057	0.00832134	3
YBL018C	POP8	0.217129	0.0888572	0.00832134	3
YOR123C	LEO1	0.217082	0.00610222	0.00832134	3
YLR440C	SEC39	0.216873	0.0908006	0.00832134	3
YMR263W	SAP30	0.216757	0.0526102	0.00832134	3
YOR226C	ISU2	0.216728	0.0498027	0.00832134	3
YPL087W	YDC1	0.216719	0.272312	0.00832134	3
YBR001C	NTH2	0.216684	0.201718	0.00832134	3
YOR112W	CEX1	0.216461	0.0951523	0.00832134	3
YOL151W	GRE2	0.216458	0.241993	0.00832134	3
YCR071C	IMG2	0.216199	0.383831	0.00832134	3
YMR019W	STB4	0.216017	0.245141	0.00832134	3
YIL045W	PIG2	0.215954	0.103418	0.0284752	2
YKR053C	YSR3	0.215072	0.157652	0.00832134	3
YLR328W	NMA1	0.215048	0.458815	0.00832134	3
YPR117W		0.215046	0.106305	0.00832134	3
YCR020W-B	HTL1	0.214886	0.117811	0.0297195	2
YMR315W		0.214795	0.273798	0.00889356	3
YML073C	RPL6A	0.214785	0.0815996	0.00889356	3
YLR281C		0.214312	0.183689	0.00889356	3
YHL035C	VMR1	0.214019	0.148293	0.00889356	3
YDR216W	ADR1	0.213897	0.11728	0.00889356	3
YBR006W	UGA2	0.213804	0.117814	0.00889356	3
YKL183W	LOT5	0.213252	0.109363	0.00889356	3
YPL239W	YAR1	0.212891	0.169675	0.00889356	3
YOR127W	RGA1	0.21266	0.150411	0.00889356	3
YOR286W		0.21227	0.167452	0.00950296	3
YJR025C	BNA1	0.211519	0.259862	0.00950296	3
YDR181C	SAS4	0.211463	0.211433	0.00950296	3
YKL038W	RGT1	0.211268	0.112253	0.00950296	3
YDR249C		0.210954	0.0353921	0.0310093	2
YOR125C	CAT5	0.210937	0.0810329	0.0310093	2
YFR013W	IOC3	0.210592	0.140669	0.00950296	3
YPR113W	PIS1	0.210372	0.22729	0.00950296	3
YPL070W	MUK1	0.210371	0.120765	0.00950296	3
YKL015W	PUT3	0.209803	0.0184343	0.0101517	3
YNL125C	ESBP6	0.209728	0.182061	0.0101517	3
YAL046C		0.209291	0.0842589	0.0101517	3
YOL007C	CSI2	0.209234	0.247766	0.0101517	3
YER150W	SPI1	0.208844	0.154888	0.0101517	3
YDL070W	BDF2	0.208766	0.0794013	0.0101517	3
YDL076C	RXT3	0.208432	0.343895	0.0101517	3
YJL018W		0.208266	0.24798	0.0101517	3
YIL127C		0.208091	0.29591	0.0101517	3
YJL066C	MPM1	0.208089	0.112205	0.0101517	3
YKL192C	ACP1	0.20778	0.148496	0.0101517	3
YFL010W-A	AUA1	0.207768	0.0618462	0.0101517	3
YKL164C	PIR1	0.20768	0.12013	0.0101517	3
YIL029C		0.207545	0.0137794	0.032346	2
YLR070C	XYL2	0.206944	0.146775	0.010842	3
YJL167W	ERG20	0.206209	0.0123229	0.010842	3
YER115C	SPR6	0.206014	0.0751676	0.010842	3
YLR288C	MEC3	0.205825	0.299244	0.010842	3
YOR240W		0.205454	0.0447243	0.010842	3
YML076C	WAR1	0.205195	0.0298903	0.010842	3
YNL306W	MRPS18	0.205121	0.203904	0.010842	3
YER093C-A		0.20483	0.0582235	0.0115764	3
YLR265C	NEJ1	0.204779	0.277558	0.0115764	3
YOR209C	NPT1	0.204705	0.0107844	0.0115764	3
YMR116C	ASC1	0.20415	0.220714	0.0351644	2
YBL023C	MCM2	0.203847	0.269781	0.0115764	3
YPL011C	TAF3	0.203091	0.232571	0.0115764	3
YGL119W	ABC1	0.202607	0.353247	0.0115764	3
YOR231W	MKK1	0.202476	0.0967343	0.0123572	3
YPL128C	TBF1	0.202329	0.188178	0.0123572	3
YOR319W	HSH49	0.202073	0.128846	0.0123572	3
YDR011W	SNQ2	0.201994	0.0255209	0.0123572	3
YJR010C-A	SPC1	0.201949	0.279365	0.0123572	3
YDR192C	NUP42	0.201507	0.0466279	0.0123572	3
YER087C-A		0.201407	0.0777312	0.0123572	3
YGR273C		0.201081	0.0679981	0.0123572	3
YPL236C		0.200963	0.237357	0.0123572	3
YCR076C		0.200562	0.108116	0.0123572	3
YBR124W		0.199605	0.187907	0.013187	3
YGR249W	MGA1	0.199557	0.265193	0.013187	3
YLR352W		0.199525	0.148493	0.0381843	2
YPL151C	PRP46	0.199176	0.209772	0.013187	3
YBR150C	TBS1	0.198747	0.224768	0.013187	3
YIL134C-A		0.198682	0.087237	0.013187	3
YOL152W	FRE7	0.197212	0.24454	0.0140686	3
YLR069C	MEF1	0.196939	0.0669412	0.0140686	3
YNL277W	MET2	0.196911	0.159774	0.0140686	3
YPR183W	DPM1	0.196314	0.279015	0.0140686	3
YPR133W-A	TOM5	0.196176	0.0990128	0.0140686	3
YNL142W	MEP2	0.196047	0.0699211	0.0140686	3
YBR060C	ORC2	0.196022	0.171708	0.0140686	3
YER154W	OXA1	0.195711	0.152611	0.0140686	3
YDR256C	CTA1	0.195593	0.120407	0.0397728	2
YOR100C	CRC1	0.19544	0.0984774	0.0140686	3
YJR080C		0.1954	0.0918987	0.0140686	3
YNL202W	SPS19	0.195378	0.0312612	0.0140686	3
YLR371W	ROM2	0.195238	0.206695	0.0140686	3
YOR375C	GDH1	0.194594	0.241246	0.0150046	3
YEL048C		0.19449	0.121709	0.0150046	3
YPR066W	UBA3	0.194028	0.128847	0.0150046	3
YDR022C	CIS1	0.193866	0.0806169	0.0150046	3
YOR208W	PTP2	0.193812	0.0470603	0.0150046	3
YML113W	DAT1	0.193758	0.0942663	0.0150046	3
YBL107C		0.193621	0.20732	0.0150046	3
YIL063C	YRB2	0.193479	0.219784	0.0150046	3
YPL078C	ATP4	0.193394	0.22063	0.0150046	3
YDR259C	YAP6	0.193386	0.0818997	0.0414154	2
YJL058C	BIT61	0.193187	0.159618	0.0150046	3
YER117W	RPL23B	0.193181	0.0934853	0.0150046	3
YNR058W	BIO3	0.193104	0.15157	0.0150046	3
YGR114C		0.192794	0.160357	0.0150046	3
YMR015C	ERG5	0.192772	0.012817	0.0150046	3
YLL053C		0.192608	0.128162	0.0150046	3
YER038W-A		0.192332	0.0166511	0.0431133	2
YGR235C		0.192127	0.203961	0.0431133	2
YLR334C		0.192103	0.394642	0.0159981	3
YOR252W	TMA16	0.191899	0.142677	0.0159981	3
YIL031W	ULP2	0.190796	0.0388727	0.0159981	3
YCR005C	CIT2	0.18992	0.0735755	0.0170521	3
YFR040W	SAP155	0.189793	0.0615653	0.0170521	3
YER015W	FAA2	0.189781	0.269009	0.0170521	3
YGL065C	ALG2	0.189566	0.174639	0.0170521	3
YIL041W	GVP36	0.18927	0.105169	0.0448678	2
YNL321W	VNX1	0.189039	0.164704	0.0170521	3
YBL080C	PET112	0.188765	0.129518	0.0448678	2
YNR056C	BIO5	0.188244	0.112637	0.0170521	3
YPL228W	CET1	0.188235	0.266909	0.0170521	3
YJL012C-A		0.187665	0.130322	0.0170521	3
YKR091W	SRL3	0.18734	0.317436	0.0181696	3
YNL111C	CYB5	0.18723	0.352675	0.0181696	3
YNL079C	TPM1	0.187196	0.230275	0.0181696	3
YML083C		0.187176	0.103995	0.0181696	3
YMR030W	RSF1	0.187162	0.0950635	0.0181696	3
YNL090W	RHO2	0.187113	0.113215	0.0181696	3
YCR006C		0.186548	0.0700829	0.0181696	3
YPR020W	ATP20	0.186312	0.0855399	0.0181696	3
YER083C	GET2	0.186181	0.0853143	0.0181696	3
YMR214W	SCJ1	0.185933	0.024557	0.0181696	3
YPL266W	DIM1	0.185477	0.14791	0.0181696	3
YDL229W	SSB1	0.1853	0.0126676	0.0181696	3
YOR271C	FSF1	0.185062	0.195964	0.0181696	3
YOR380W	RDR1	0.18482	0.317364	0.0193539	3
YBR082C	UBC4	0.184792	0.123536	0.0193539	3
YJR018W		0.18438	0.0124064	0.0485516	2
YKL218C	SRY1	0.183641	0.0576964	0.0485516	2
YHR005C-A	MRS11	0.183536	0.112343	0.0193539	3
YGR016W		0.183102	0.07154	0.0193539	3
YGR192C	TDH3	0.183095	0.0320947	0.0193539	3
YPR104C	FHL1	0.182512	0.267636	0.0193539	3
YOR384W	FRE5	0.182349	0.0647582	0.0206083	3
YDL120W	YFH1	0.182119	0.131763	0.0206083	3
YBR255W	MTC4	0.182086	0.0392086	0.0206083	3
YMR064W	AEP1	0.182029	0.0833989	0.0206083	3
YKR059W	TIF1	0.181645	0.130759	0.0504836	2
YJR055W	HIT1	0.18144	0.0152834	0.0206083	3
YHR036W	BRL1	0.181374	0.21088	0.0206083	3
YBR003W	COQ1	0.180845	0.35761	0.0206083	3
YKL120W	OAC1	0.180383	0.125608	0.0206083	3
YIL026C	IRR1	0.180215	0.0639553	0.0206083	3
YIR015W	RPR2	0.179824	0.219707	0.0219362	3
YJL161W	FMP33	0.179768	0.223246	0.0219362	3
YLR251W	SYM1	0.179475	0.0504379	0.0219362	3
YPR006C	ICL2	0.179366	0.216374	0.0219362	3
YKL174C	TPO5	0.179301	0.370326	0.0524775	2
YPR004C		0.17926	0.0366623	0.0219362	3
YMR224C	MRE11	0.178992	0.117265	0.0219362	3
YDL051W	LHP1	0.178709	0.102092	0.0219362	3
YPL161C	BEM4	0.178368	0.104997	0.0219362	3
YPR138C	MEP3	0.178328	0.042536	0.0219362	3
YBR069C	TAT1	0.178133	0.0753746	0.0219362	3
YDR258C	HSP78	0.177039	0.0564796	0.0545348	2
YOR104W	PIN2	0.176838	0.0520807	0.0233413	3
YOR213C	SAS5	0.176742	0.0366386	0.0233413	3
YLR325C	RPL38	0.176724	0.250843	0.0233413	3
YDR378C	LSM6	0.176368	0.071395	0.0233413	3
YGR142W	BTN2	0.176267	0.0949352	0.0233413	3
YDR248C		0.176091	0.168867	0.0545348	2
YOR364W		0.175832	0.152473	0.0233413	3
YHR139C-A		0.175827	0.0795304	0.0233413	3
YDL236W	PHO13	0.175499	0.108473	0.0233413	3
YNL324W		0.175374	0.12281	0.0233413	3
YGR140W	CBF2	0.175345	0.139545	0.0233413	3
YDR309C	GIC2	0.175125	0.0985306	0.0545348	2
YPL232W	SSO1	0.174685	0.26299	0.0248271	3
YGR237C		0.174553	0.0158424	0.0248271	3
YLR287C		0.174503	0.424577	0.0248271	3
YIR021W	MRS1	0.174269	0.069789	0.056657	2
YPL135W	ISU1	0.174217	0.0441267	0.0248271	3
YIL015W	BAR1	0.174092	0.0207235	0.056657	2
YDL017W	CDC7	0.173884	0.0470679	0.0248271	3
YKL005C	BYE1	0.173786	0.154007	0.0248271	3
YCR082W	AHC2	0.173723	0.0467373	0.0248271	3
YNL230C	ELA1	0.173564	0.0637976	0.0248271	3
YDR512C	EMI1	0.17356	0.2066	0.0248271	3
YJL015C		0.173398	0.224841	0.0248271	3
YLR331C	JIP3	0.173105	0.0815373	0.0248271	3
YKL186C	MTR2	0.173104	0.124695	0.0248271	3
YDL153C	SAS10	0.172701	0.0237625	0.0248271	3
YGR126W		0.172598	0.144501	0.0248271	3
YNR014W		0.172101	0.135692	0.0263975	3
YPL165C	SET6	0.171883	0.0644211	0.0263975	3
YNL209W	SSB2	0.171617	0.0770835	0.0263975	3
YCR053W	THR4	0.171581	0.19885	0.0263975	3
YJL157C	FAR1	0.171493	0.0250281	0.0263975	3
YJL103C	GSM1	0.171368	0.0668168	0.0263975	3
YDR185C		0.171123	0.107893	0.0263975	3
YOR014W	RTS1	0.171085	0.113155	0.0263975	3
YGR108W	CLB1	0.170985	0.0412204	0.0263975	3
YDL239C	ADY3	0.170712	0.0727111	0.0263975	3
YGR279C	SCW4	0.170624	0.125338	0.0588456	2
YLL001W	DNM1	0.170498	0.0795655	0.0263975	3
YPL105C	SYH1	0.170454	0.032952	0.0263975	3
YJL144W		0.169817	0.108873	0.0280562	3
YBL067C	UBP13	0.169402	0.0621251	0.0280562	3
YNL293W	MSB3	0.168574	0.153317	0.0280562	3
YLR145W	RMP1	0.168276	0.0913385	0.0280562	3
YJL136C	RPS21B	0.167984	0.0757065	0.0280562	3
YGR124W	ASN2	0.167666	0.0485015	0.0280562	3
YPL253C	VIK1	0.167425	0.233024	0.0298072	3
YDR296W	MHR1	0.167213	0.160238	0.0298072	3
YAL034W-A	MTW1	0.167084	0.253471	0.0298072	3
YLR026C	SED5	0.166917	0.122945	0.0298072	3
YDR333C		0.166914	0.00916142	0.0634291	2
YLR141W	RRN5	0.16632	0.167601	0.0298072	3
YDL204W	RTN2	0.166294	0.102006	0.0634291	2
YCR034W	FEN1	0.165979	0.287202	0.0298072	3
YJR092W	BUD4	0.164782	0.224691	0.0316547	3
YIL012W		0.164592	0.00565392	0.0658276	2
YNL305C		0.164277	0.210358	0.0658276	2
YKR075C		0.164264	0.00924949	0.0658276	2
YBL100C		0.164261	0.158524	0.0316547	3
YMR281W	GPI12	0.164253	0.124092	0.0316547	3
YPR156C	TPO3	0.164157	0.023504	0.0316547	3
YBR059C	AKL1	0.163955	0.06809	0.0316547	3
YLL034C	RIX7	0.163902	0.206844	0.0316547	3
YNL304W	YPT11	0.163877	0.278316	0.0316547	3
YNL040W		0.163566	0.125446	0.0316547	3
YHR168W	MTG2	0.163247	0.136228	0.0316547	3
YOL123W	HRP1	0.162845	0.0320665	0.0316547	3
YLR434C		0.162655	0.0929686	0.0316547	3
YPL051W	ARL3	0.162617	0.130031	0.0316547	3
YJR091C	JSN1	0.162554	0.021838	0.0316547	3
YCL064C	CHA1	0.162436	0.100625	0.0336027	3
YLR023C	IZH3	0.162316	0.0347063	0.0336027	3
YPL081W	RPS9A	0.162183	0.0659813	0.0336027	3
YDR506C		0.162051	0.0924408	0.0336027	3
YGL218W		0.161926	0.0988044	0.0336027	3
YKL083W		0.161841	0.0640794	0.0336027	3
YPL009C		0.161562	0.0260847	0.0336027	3
YLR047C	FRE8	0.161559	0.116554	0.0336027	3
YNR020C	ATP23	0.160904	0.126803	0.0336027	3
YOR229W	WTM2	0.16079	0.120306	0.0336027	3
YER159C	BUR6	0.160732	0.115201	0.0336027	3
YOR287C		0.160538	0.159091	0.0336027	3
YAL023C	PMT2	0.160315	0.108021	0.0336027	3
YDR220C		0.160003	0.138883	0.0336027	3
YLR104W		0.159981	0.13568	0.0356555	3
YLR001C		0.159957	0.249448	0.0356555	3
YPL230W	USV1	0.159956	0.204479	0.0356555	3
YML071C	COG8	0.159948	0.0971541	0.0356555	3
YOR114W		0.159479	0.1254	0.0356555	3
YMR048W	CSM3	0.159437	0.112239	0.0356555	3
YPR154W	PIN3	0.159116	0.0555149	0.0356555	3
YNR013C	PHO91	0.158157	0.0732576	0.0356555	3
YBR154C	RPB5	0.157747	0.111508	0.070849	2
YKL150W	MCR1	0.157492	0.0798956	0.0378175	3
YKR046C	PET10	0.157418	0.147938	0.0378175	3
YER178W	PDA1	0.15715	0.23495	0.0378175	3
YOR284W	HUA2	0.156664	0.1262	0.0378175	3
YIL066C	RNR3	0.156553	0.0582501	0.0378175	3
YGL013C	PDR1	0.156349	0.171061	0.0734765	2
YHR022C-A		0.156189	0.0659301	0.0378175	3
YIL108W		0.15595	0.12932	0.0378175	3
YGR295C	COS6	0.155859	0.116163	0.0378175	3
YNL100W		0.155485	0.303706	0.0378175	3
YIR006C	PAN1	0.155204	0.234096	0.0378175	3
YGL025C	PGD1	0.154896	0.105088	0.040093	3
YOL017W	ESC8	0.154597	0.139307	0.040093	3
YDL237W		0.154406	0.0167146	0.040093	3
YNL128W	TEP1	0.15401	0.0269491	0.040093	3
YKR055W	RHO4	0.153944	0.0469095	0.0761857	2
YBR194W		0.153809	0.148457	0.040093	3
YKL166C	TPK3	0.153437	0.0214617	0.040093	3
YDR193W		0.153242	0.0905433	0.040093	3
YNL232W	CSL4	0.153073	0.0296017	0.040093	3
YDL057W		0.152988	0.0614437	0.040093	3
YLR017W	MEU1	0.152931	0.0731638	0.040093	3
YJR033C	RAV1	0.152674	0.0932812	0.040093	3
YKL220C	FRE2	0.152667	0.151934	0.040093	3
YOL109W	ZEO1	0.152573	0.113294	0.040093	3
YKR105C	VBA5	0.152343	0.2759	0.0424868	3
YDR319C		0.152287	0.0100081	0.0789796	2
YPR127W		0.152172	0.0785102	0.0424868	3
YBR169C	SSE2	0.151962	0.293919	0.0424868	3
YJL120W		0.151883	0.136164	0.0424868	3
YDL069C	CBS1	0.151631	0.036376	0.0424868	3
YMR233W	TRI1	0.151593	0.120523	0.0424868	3
YNL310C	ZIM17	0.151539	0.0521539	0.0424868	3
YLR274W	MCM5	0.151527	0.0686228	0.0789796	2
YNL287W	SEC21	0.15132	0.143104	0.0424868	3
YNL087W	TCB2	0.150837	0.079347	0.0424868	3
YAR027W	UIP3	0.150829	0.0732133	0.0424868	3
YCR009C	RVS161	0.150821	0.160086	0.0424868	3
YOR383C	FIT3	0.150709	0.0958895	0.0424868	3
YPL091W	GLR1	0.150691	0.212314	0.0424868	3
YNL078W	NIS1	0.150675	0.201872	0.0424868	3
YDL006W	PTC1	0.150565	0.126538	0.0424868	3
YNR070W		0.150231	0.0333978	0.0789796	2
YAL033W	POP5	0.150226	0.0453362	0.0424868	3
YKL148C	SDH1	0.150108	0.0209429	0.0424868	3
YGR224W	AZR1	0.150079	0.0177759	0.0789796	2
YOR019W		0.149834	0.137595	0.0450034	3
YPL159C	PET20	0.149813	0.0792382	0.0450034	3
YMR273C	ZDS1	0.149736	0.0729577	0.0450034	3
YOR300W		0.149625	0.111696	0.0450034	3
YOR129C	AFI1	0.149302	0.0846616	0.0450034	3
YPR148C		0.149289	0.074136	0.0450034	3
YLL029W	FRA1	0.14927	0.0152223	0.0450034	3
YPL260W		0.149238	0.0610755	0.0450034	3
YHR159W		0.149009	0.0629492	0.0450034	3
YLR020C	YEH2	0.14897	0.0938388	0.0450034	3
YMR013C	SEC59	0.148834	0.175409	0.0450034	3
YAL044C	GCV3	0.148655	0.0737994	0.0818618	2
YNL049C	SFB2	0.148638	0.0601622	0.0450034	3
YDR217C	RAD9	0.148084	0.248251	0.0450034	3
YPR112C	MRD1	0.14805	0.258083	0.0450034	3
YOR344C	TYE7	0.147857	0.0687615	0.0450034	3
YDL148C	NOP14	0.147473	0.019982	0.0476476	3
YDR125C	ECM18	0.147163	0.035211	0.0476476	3
YGL199C		0.147118	0.166363	0.0476476	3
YNL217W		0.147091	0.069205	0.0476476	3
YGL117W		0.146829	0.141499	0.0476476	3
YPR163C	TIF3	0.146776	0.250103	0.0476476	3
YIR044C		0.146774	0.194916	0.0476476	3
YLL028W	TPO1	0.14661	0.207549	0.0476476	3
YLR180W	SAM1	0.146562	0.0264861	0.0476476	3
YLR032W	RAD5	0.14602	0.270028	0.0476476	3
YBR083W	TEC1	0.145915	0.101326	0.0476476	3
YER048C	CAJ1	0.145823	0.0884331	0.0476476	3
YJL020C	BBC1	0.145513	0.109013	0.0476476	3
YIL050W	PCL7	0.145396	0.0892516	0.0848361	2
YPR126C		0.145379	0.0129669	0.0476476	3
YKR030W	GMH1	0.145185	0.0370042	0.0848361	2
YER143W	DDI1	0.145072	0.0942271	0.0476476	3
YNL066W	SUN4	0.145068	0.0574967	0.0476476	3
YKL171W		0.144839	0.0883624	0.0504245	3
YGR055W	MUP1	0.144554	0.0550693	0.0504245	3
YDR120C	TRM1	0.144361	0.0312171	0.0504245	3
YDL014W	NOP1	0.144309	0.0442682	0.0504245	3
YMR239C	RNT1	0.144262	0.0200682	0.0504245	3
YIL118W	RHO3	0.14396	0.230865	0.0504245	3
YBR294W	SUL1	0.1435	0.307494	0.087907	2
YLR366W		0.143421	0.0330121	0.0504245	3
YNL098C	RAS2	0.143416	0.15011	0.0504245	3
YDL118W		0.142854	0.178724	0.0504245	3
YPL062W		0.142756	0.217659	0.0504245	3
YPL184C		0.14266	0.0568552	0.0504245	3
YML111W	BUL2	0.142486	0.021384	0.053339	3
YDR255C	RMD5	0.14234	0.0395244	0.0910794	2
YLL024C	SSA2	0.142336	0.104616	0.053339	3
YER039C	HVG1	0.142236	0.0977221	0.053339	3
YJL116C	NCA3	0.142188	0.151249	0.053339	3
YBL054W	TOD6	0.141906	0.0147895	0.053339	3
YOL060C	MAM3	0.141885	0.0402295	0.053339	3
YHR050W-A		0.141643	0.107605	0.053339	3
YGR231C	PHB2	0.141605	0.0744144	0.053339	3
YLR195C	NMT1	0.141555	0.0938583	0.053339	3
YJL059W	YHC3	0.141501	0.0407135	0.053339	3
YKL044W		0.141264	0.00399988	0.0910794	2
YDR494W	RSM28	0.141159	0.137948	0.053339	3
YPR146C		0.141128	0.0412645	0.053339	3
YKR035C	OPI8	0.141103	0.104479	0.0910794	2
YDR300C	PRO1	0.141022	0.0814012	0.053339	3
YEL014C		0.140994	0.0370682	0.053339	3
YIR013C	GAT4	0.140833	0.0552336	0.053339	3
YMR133W	REC114	0.140796	0.209783	0.053339	3
YIL003W	CFD1	0.140679	0.224442	0.053339	3
YKR106W		0.140512	0.0740638	0.053339	3
YLR108C		0.140498	0.189086	0.053339	3
YOR105W		0.140284	0.073226	0.053339	3
YIL107C	PFK26	0.140112	0.0996408	0.053339	3
YJL029C	VPS53	0.14008	0.0640853	0.053339	3
YNR001C	CIT1	0.139899	0.159627	0.0563964	3
YNR034W	SOL1	0.1396	0.0803647	0.0563964	3
YIR043C		0.139333	0.128678	0.0563964	3
YMR271C	URA10	0.139237	0.104348	0.0563964	3
YJR120W		0.139225	0.0398222	0.0563964	3
YJL127C	SPT10	0.139167	0.105679	0.0943591	2
YFL008W	SMC1	0.139018	0.0235974	0.0563964	3
YAL005C	SSA1	0.138782	0.0791601	0.0563964	3
YGR265W		0.138624	0.217581	0.0563964	3
YLR263W	RED1	0.138407	0.0898011	0.0563964	3
YPR186C	PZF1	0.138358	0.233103	0.0563964	3
YJL013C	MAD3	0.138305	0.0802263	0.0563964	3
YLL026W	HSP104	0.138099	0.0625692	0.0563964	3
YGL121C	GPG1	0.138093	0.109842	0.0563964	3
YER073W	ALD5	0.137957	0.0622793	0.0563964	3
YNL201C	PSY2	0.137918	0.0434408	0.0563964	3
YDL133W		0.137908	0.0442894	0.0563964	3
YLR285W	NNT1	0.137572	0.351124	0.0563964	3
YBR005W	RCR1	0.137565	0.20707	0.0563964	3
YDR209C		0.13747	0.0527768	0.0596023	3
YLR290C		0.137287	0.293963	0.0977523	2
YOR249C	APC5	0.13715	0.104518	0.0596023	3
YFL010C	WWM1	0.137005	0.0616275	0.0596023	3
YOL133W	HRT1	0.13694	0.100232	0.0596023	3
YLR011W	LOT6	0.136918	0.0325545	0.0596023	3
YPR142C		0.136837	0.181507	0.0596023	3
YML010W	SPT5	0.136493	0.189824	0.0596023	3
YNL262W	POL2	0.136195	0.085431	0.0596023	3
YPR129W	SCD6	0.135997	0.0480976	0.0596023	3
YDL193W	NUS1	0.135877	0.03504	0.0596023	3
YBL099W	ATP1	0.135816	0.138177	0.0596023	3
YOR376W		0.135489	0.0689333	0.0977523	2
YOL077W-A	ATP19	0.135347	0.0811673	0.0596023	3
YDR295C	HDA2	0.135313	0.100101	0.0977523	2
YPL119C	DBP1	0.135101	0.0087227	0.0596023	3
YDL207W	GLE1	0.134973	0.0641879	0.0629624	3
YJR098C		0.134935	0.154974	0.0629624	3
YPL100W	ATG21	0.134864	0.255464	0.0629624	3
YPL130W	SPO19	0.134785	0.0226724	0.0629624	3
YCL031C	RRP7	0.13476	0.0308709	0.101266	2
YIL001W		0.134618	0.0603919	0.101266	2
YDR251W	PAM1	0.134561	0.00982452	0.101266	2
YJL150W		0.134545	0.0373416	0.0629624	3
YJL077W-B		0.134522	0.0271951	0.0629624	3
YPL005W	AEP3	0.134506	0.0109881	0.0629624	3
YJL078C	PRY3	0.134366	0.141759	0.0629624	3
YJL133W	MRS3	0.134338	0.0273223	0.0629624	3
YLR249W	YEF3	0.134245	0.24385	0.0629624	3
YML018C		0.134227	0.0777135	0.0629624	3
YLR057W		0.134163	0.080838	0.0629624	3
YNR053C	NOG2	0.134143	0.0741499	0.0629624	3
YER048W-A	ISD11	0.133838	0.112284	0.0629624	3
YNL303W		0.1338	0.0485352	0.0629624	3
YOR122C	PFY1	0.133743	0.101249	0.0629624	3
YOR266W	PNT1	0.133686	0.0464261	0.0629624	3
YBL074C	AAR2	0.133683	0.173719	0.0629624	3
YDL151C	BUD30	0.133615	0.125737	0.0629624	3
YOL155C	HPF1	0.133425	0.0115704	0.0629624	3
YER114C	BOI2	0.133343	0.0338282	0.0629624	3
YPR151C	SUE1	0.133325	0.135007	0.0629624	3
YHR146W	CRP1	0.133135	0.109104	0.0629624	3
YER142C	MAG1	0.132872	0.026255	0.0629624	3
YNL134C		0.132317	0.0466193	0.0664827	3
YBL085W	BOI1	0.132207	0.0777815	0.0664827	3
YPR037C	ERV2	0.132196	0.102888	0.0664827	3
YFR057W		0.132129	0.180369	0.0664827	3
YOR119C	RIO1	0.132053	0.0434215	0.0664827	3
YEL059W		0.131875	0.143097	0.0664827	3
YBR249C	ARO4	0.131509	0.0299904	0.0664827	3
YGL181W	GTS1	0.131404	0.0139783	0.0664827	3
YDR242W	AMD2	0.131238	0.023882	0.0664827	3
YNL334C	SNO2	0.131214	0.0872113	0.0664827	3
YHR191C	CTF8	0.131143	0.0544333	0.0664827	3
YOL062C	APM4	0.130835	0.0164822	0.0664827	3
YNL297C	MON2	0.130774	0.0265221	0.0664827	3
YMR252C		0.130634	0.219114	0.0664827	3
YMR218C	TRS130	0.130465	0.0986331	0.0664827	3
YBL075C	SSA3	0.130178	0.07563	0.0664827	3
YDR493W		0.130034	0.0266276	0.0664827	3
YMR177W	MMT1	0.129971	0.0537344	0.0701696	3
YCL022C		0.129942	0.0604012	0.0701696	3
YIL173W	VTH1	0.129449	0.0599257	0.0701696	3
YGR291C		0.129209	0.103447	0.0701696	3
YGL096W	TOS8	0.128958	0.162854	0.0701696	3
YMR086C-A		0.128854	0.0440616	0.10869	2
YKL039W	PTM1	0.128759	0.0517078	0.0701696	3
YCR095W-A		0.12864	0.0758762	0.0701696	3
YFL003C	MSH4	0.128618	0.170448	0.0701696	3
YKL157W	APE2	0.128604	0.042346	0.0701696	3
YLL017W		0.128553	0.0759054	0.0701696	3
YML131W		0.128493	0.0421174	0.0701696	3
YOR217W	RFC1	0.1284	0.203023	0.0701696	3
YMR304C-A		0.128385	0.0512398	0.0701696	3
YDR502C	SAM2	0.128362	0.0697589	0.0701696	3
YML065W	ORC1	0.128352	0.15201	0.0701696	3
YGL176C		0.128348	0.0692777	0.0701696	3
YBR099C		0.128251	0.3198	0.0701696	3
YGL180W	ATG1	0.127938	0.0363673	0.0701696	3
YOR036W	PEP12	0.127898	0.04673	0.0701696	3
YBR167C	POP7	0.127636	0.0453155	0.0701696	3
YPR116W		0.127332	0.00690863	0.07403	3
YOR077W	RTS2	0.127257	0.0617203	0.07403	3
YMR029C	FAR8	0.127255	0.0866141	0.07403	3
YLR316C	TAD3	0.127131	0.0199152	0.07403	3
YMR254C		0.126907	0.157597	0.07403	3
YPL110C	GDE1	0.126879	0.0401133	0.07403	3
YER088C	DOT6	0.126843	0.0087376	0.07403	3
YLR094C	GIS3	0.12676	0.134365	0.07403	3
YAL054C	ACS1	0.126554	0.0754955	0.07403	3
YBR090C		0.126278	0.0773871	0.07403	3
YHR065C	RRP3	0.126268	0.172958	0.07403	3
YDL060W	TSR1	0.12598	0.0533048	0.07403	3
YLR003C	CMS1	0.125808	0.0653389	0.07403	3
YMR183C	SSO2	0.125657	0.0632992	0.07403	3
YGR289C	MAL11	0.125641	0.0698163	0.07403	3
YDR257C	RKM4	0.125517	0.0536571	0.112618	2
YGR139W		0.12549	0.0519254	0.07403	3
YNL336W	COS1	0.125458	0.0528337	0.07403	3
YJL151C	SNA3	0.125274	0.196186	0.07403	3
YOR044W	IRC23	0.124765	0.077873	0.0780712	3
YJR093C	FIP1	0.124545	0.0366469	0.0780712	3
YOL006C	TOP1	0.124447	0.297985	0.116706	2
YJR024C	MDE1	0.123978	0.220798	0.0780712	3
YBL065W		0.123907	0.0638989	0.116706	2
YNL271C	BNI1	0.123843	0.489642	0.0780712	3
YER006W	NUG1	0.123522	0.0726206	0.0780712	3
YKR076W	ECM4	0.123497	0.0339079	0.116706	2
YPL224C	MMT2	0.123445	0.0575557	0.0780712	3
YGL161C	YIP5	0.123338	0.0507531	0.0780712	3
YGR022C		0.123089	0.0609798	0.0780712	3
YML109W	ZDS2	0.122937	0.0422354	0.0780712	3
YFL051C		0.122913	0.0878003	0.116706	2
YER098W	UBP9	0.122905	0.0442082	0.0780712	3
YGR122W		0.122904	0.0830788	0.0780712	3
YGR137W		0.122724	0.0373851	0.0780712	3
YDR191W	HST4	0.122578	0.0500109	0.0780712	3
YLR139C	SLS1	0.122568	0.0467788	0.116706	2
YDR323C	PEP7	0.122298	0.00725919	0.120967	2
YNL313C		0.122153	0.033508	0.0823011	3
YIL011W	TIR3	0.122119	0.0212547	0.120967	2
YDR322C-A	TIM11	0.121973	0.0548273	0.0823011	3
YPL145C	KES1	0.121769	0.0557257	0.0823011	3
YJL061W	NUP82	0.12162	0.0258684	0.0823011	3
YLR030W		0.121604	0.0846359	0.0823011	3
YDR507C	GIN4	0.121601	0.0828262	0.0823011	3
YFR022W	ROG3	0.121566	0.126681	0.120967	2
YNR049C	MSO1	0.121486	0.194066	0.0823011	3
YDL038C		0.121314	0.0632995	0.0823011	3
YOR057W	SGT1	0.121177	0.0516636	0.0823011	3
YBR140C	IRA1	0.121011	0.0529297	0.0823011	3
YBL102W	SFT2	0.120979	0.107261	0.0823011	3
YPL111W	CAR1	0.120929	0.0656087	0.0823011	3
YOR101W	RAS1	0.120922	0.0875586	0.0823011	3
YBR067C	TIP1	0.120781	0.0339617	0.0823011	3
YNL026W	SAM50	0.120765	0.131853	0.0823011	3
YDR253C	MET32	0.120725	0.0146718	0.120967	2
YPL114W		0.120614	0.0373062	0.0823011	3
YNR016C	ACC1	0.120188	0.0582175	0.0823011	3
YKL017C	HCS1	0.120031	0.11428	0.0823011	3
YGR241C	YAP1802	0.119792	0.0456699	0.0867284	3
YNL042W-B		0.119772	0.0495936	0.0867284	3
YDR213W	UPC2	0.119707	0.202524	0.0867284	3
YMR261C	TPS3	0.119498	0.0556056	0.0867284	3
YOR079C	ATX2	0.119407	0.185216	0.0867284	3
YJL196C	ELO1	0.119392	0.0243618	0.0867284	3
YML015C	TAF11	0.119219	0.0244217	0.0867284	3
YOL014W		0.119068	0.106029	0.0867284	3
YDR203W		0.118901	0.333716	0.0867284	3
YNL097C-A		0.118805	0.0211371	0.0867284	3
YDR052C	DBF4	0.118724	0.0322208	0.0867284	3
YIL099W	SGA1	0.118711	0.174906	0.0867284	3
YOR160W	MTR10	0.118688	0.105914	0.0867284	3
YKL132C	RMA1	0.11837	0.0682024	0.0867284	3
YJL017W		0.118362	0.131351	0.0867284	3
YGL263W	COS12	0.118308	0.272142	0.0867284	3
YOR087W	YVC1	0.1183	0.191987	0.0867284	3
YOR060C		0.118248	0.113823	0.0867284	3
YLR350W	ORM2	0.118102	0.1167	0.0867284	3
YGR011W		0.118056	0.0842102	0.0867284	3
YMR098C	ATP25	0.117966	0.075798	0.0867284	3
YOL099C		0.117962	0.0901478	0.0867284	3
YGL047W	ALG13	0.11795	0.148746	0.0867284	3
YAR047C		0.117875	0.0294357	0.0867284	3
YFR031C	SMC2	0.117773	0.173754	0.0867284	3
YER113C	TMN3	0.117698	0.0336444	0.0867284	3
YDR519W	FPR2	0.117691	0.0595309	0.0867284	3
YJR139C	HOM6	0.11767	0.032439	0.0867284	3
YER060W	FCY21	0.117574	0.0331452	0.0867284	3
YMR295C		0.117507	0.0515774	0.0867284	3
YDL171C	GLT1	0.117427	0.112588	0.0913628	3
YCR094W	CDC50	0.117351	0.128164	0.0913628	3
YDR139C	RUB1	0.117221	0.0242776	0.0913628	3
YER118C	SHO1	0.116875	0.0211292	0.0913628	3
YBR207W	FTH1	0.116866	0.0961976	0.0913628	3
YMR084W		0.116758	0.0666198	0.130062	2
YGR130C		0.116351	0.0563688	0.0913628	3
YOR219C	STE13	0.116275	0.0624558	0.0913628	3
YLR134W	PDC5	0.116079	0.0431903	0.0913628	3
YHR113W		0.116065	0.103426	0.0913628	3
YNL173C	MDG1	0.116047	0.0149098	0.130062	2
YIL064W		0.115878	0.113208	0.130062	2
YGR112W	SHY1	0.115859	0.0589863	0.0913628	3
YCL074W		0.115841	0.0118899	0.0913628	3
YER052C	HOM3	0.115808	0.0322098	0.0913628	3
YKR052C	MRS4	0.115784	0.0243992	0.130062	2
YML036W	CGI121	0.115773	0.0765276	0.0913628	3
YMR028W	TAP42	0.115743	0.216579	0.0913628	3
YIL073C	SPO22	0.11565	0.118352	0.130062	2
YLL048C	YBT1	0.115524	0.0168375	0.0913628	3
YIL072W	HOP1	0.115365	0.106873	0.130062	2
YNL195C		0.115326	0.164486	0.0913628	3
YMR181C		0.115266	0.178412	0.0913628	3
YLR016C	PML1	0.115256	0.0596778	0.0913628	3
YPR161C	SGV1	0.115149	0.0785162	0.0913628	3
YOL130W	ALR1	0.115038	0.0690411	0.0913628	3
YGR247W	CPD1	0.11502	0.105287	0.0913628	3
YNR015W	SMM1	0.114934	0.0569005	0.134929	2
YER079W		0.114857	0.0254561	0.0962147	3
YNR066C		0.114806	0.038305	0.0962147	3
YHL031C	GOS1	0.114783	0.0367802	0.0962147	3
YJR099W	YUH1	0.114778	0.191197	0.0962147	3
YNL330C	RPD3	0.11475	0.0737152	0.0962147	3
YNR042W		0.114345	0.0225432	0.0962147	3
YHR029C	YHI9	0.114319	0.0401249	0.0962147	3
YLR142W	PUT1	0.114308	0.0703346	0.0962147	3
YNL114C		0.11401	0.0257771	0.134929	2
YGL076C	RPL7A	0.114001	0.0802873	0.0962147	3
YFL049W	SWP82	0.113991	0.0529699	0.134929	2
YDL195W	SEC31	0.113821	0.0564912	0.0962147	3
YMR253C		0.113821	0.200015	0.0962147	3
YPL169C	MEX67	0.113816	0.0712045	0.0962147	3
YOR247W	SRL1	0.113484	0.110644	0.0962147	3
YLR386W	VAC14	0.113455	0.247856	0.0962147	3
YLR091W		0.113377	0.102316	0.0962147	3
YKR050W	TRK2	0.113269	0.103253	0.134929	2
YER007C-A	TMA20	0.113233	0.0205793	0.0962147	3
YDL121C		0.113231	0.0228341	0.0962147	3
YOR257W	CDC31	0.113055	0.179987	0.0962147	3
YOL013W-B		0.112983	0.0789119	0.0962147	3
YIL037C	PRM2	0.112955	0.0161409	0.134929	2
YPR013C		0.112932	0.158993	0.0962147	3
YGL125W	MET13	0.11268	0.164679	0.0962147	3
YKR102W	FLO10	0.112646	0.0710079	0.0962147	3
YMR101C	SRT1	0.11263	0.10926	0.0962147	3
YPL076W	GPI2	0.11252	0.14357	0.0962147	3
YGR129W	SYF2	0.112492	0.0412964	0.101296	3
YKL144C	RPC25	0.11248	0.167742	0.101296	3
YLR248W	RCK2	0.112328	0.0692464	0.101296	3
YKL008C	LAC1	0.112212	0.0453038	0.101296	3
YKL034W	TUL1	0.112178	0.063825	0.101296	3
YHR071W	PCL5	0.11207	0.0749592	0.101296	3
YEL057C		0.112067	0.0254479	0.101296	3
YLR345W		0.112006	0.215911	0.101296	3
YGR211W	ZPR1	0.111894	0.240359	0.101296	3
YOR336W	KRE5	0.11171	0.182134	0.101296	3
YBR065C	ECM2	0.111672	0.0230228	0.101296	3
YMR075W	RCO1	0.111664	0.014406	0.140035	2
YPR164W	MMS1	0.11165	0.175809	0.140035	2
YNL045W		0.111468	0.0569396	0.101296	3
YOR023C	AHC1	0.111376	0.0569176	0.101296	3
YDR476C		0.111261	0.153993	0.101296	3
YPR158W	CUR1	0.111167	0.0840365	0.101296	3
YML124C	TUB3	0.111127	0.0813784	0.101296	3
YDL041W		0.110819	0.0548235	0.140035	2
YHR078W		0.110771	0.0820858	0.101296	3
YML046W	PRP39	0.1107	0.124734	0.101296	3
YDL068W		0.110645	0.0388513	0.101296	3
YAL004W		0.11062	0.078019	0.101296	3
YDL135C	RDI1	0.110334	0.00911834	0.101296	3
YOL019W-A		0.110295	0.051403	0.101296	3
YBR125C	PTC4	0.110254	0.0792008	0.101296	3
YML066C	SMA2	0.110209	0.0199182	0.101296	3
YKL162C-A		0.110153	0.00666238	0.140035	2
YER019C-A	SBH2	0.110098	0.0734784	0.101296	3
YMR184W	ADD37	0.110087	0.0352113	0.140035	2
YDL105W	NSE4	0.109984	0.0125277	0.106619	3
YOR053W		0.109883	0.149966	0.106619	3
YPL193W	RSA1	0.109749	0.0324758	0.145399	2
YJR019C	TES1	0.109738	0.0564892	0.106619	3
YGR141W	VPS62	0.109695	0.0304271	0.106619	3
YAL066W		0.10962	0.0668318	0.106619	3
YKL031W		0.109595	0.0650095	0.106619	3
YOL135C	MED7	0.109145	0.308694	0.106619	3
YOR062C		0.109026	0.0789493	0.106619	3
YAR035W	YAT1	0.108986	0.00784963	0.106619	3
YKR093W	PTR2	0.108958	0.186301	0.106619	3
YLR372W	SUR4	0.108954	0.114265	0.106619	3
YMR025W	CSI1	0.10852	0.127853	0.106619	3
YJR134C	SGM1	0.108396	0.0492779	0.106619	3
YNL041C	COG6	0.108367	0.0583183	0.106619	3
YER103W	SSA4	0.10821	0.0471661	0.106619	3
YGR151C		0.108055	0.0206503	0.106619	3
YOR227W	HER1	0.108002	0.0820878	0.106619	3
YKR104W		0.107871	0.0620251	0.106619	3
YPL150W		0.107779	0.0313989	0.106619	3
YFR001W	LOC1	0.107775	0.0706843	0.145399	2
YPR021C	AGC1	0.10773	0.0459004	0.106619	3
YKR035W-A	DID2	0.107613	0.067332	0.145399	2
YJR066W	TOR1	0.107528	0.0930975	0.106619	3
YDR521W		0.107519	0.013039	0.106619	3
YOL022C		0.107517	0.202371	0.106619	3
YOL004W	SIN3	0.107432	0.188634	0.1122	3
YPL262W	FUM1	0.107394	0.113132	0.1122	3
YGR157W	CHO2	0.107336	0.0602217	0.1122	3
YKR008W	RSC4	0.107318	0.116369	0.1122	3
YMR008C	PLB1	0.107235	0.0741223	0.1122	3
YPR140W	TAZ1	0.107119	0.0860888	0.1122	3
YOR360C	PDE2	0.107103	0.074678	0.1122	3
YDR018C		0.10704	0.089998	0.1122	3
YFR056C		0.106987	0.0303647	0.1122	3
YJL062W-A		0.10685	0.11563	0.1122	3
YJR137C	ECM17	0.106754	0.0153327	0.151045	2
YLR260W	LCB5	0.106529	0.0323768	0.151045	2
YMR090W		0.106481	0.0583963	0.151045	2
YFR003C	YPI1	0.106283	0.0381494	0.1122	3
YDL210W	UGA4	0.106156	0.0883908	0.1122	3
YPL258C	THI21	0.106097	0.0905571	0.1122	3
YNL265C	IST1	0.106068	0.0687064	0.151045	2
YPL181W	CTI6	0.106015	0.0435616	0.1122	3
YDR037W	KRS1	0.105968	0.0148837	0.1122	3
YPR008W	HAA1	0.105922	0.112319	0.1122	3
YFR044C	DUG1	0.105726	0.13719	0.1122	3
YDR424C	DYN2	0.105681	0.0364522	0.1122	3
YBR245C	ISW1	0.105434	0.0329977	0.1122	3
YGL116W	CDC20	0.105207	0.0615494	0.1122	3
YDR531W		0.105092	0.0257876	0.1122	3
YPL163C	SVS1	0.105082	0.0279725	0.1122	3
YDR340W		0.105068	0.0669952	0.1122	3
YDR474C		0.105044	0.0803522	0.1122	3
YER060W-A	FCY22	0.10499	0.00685593	0.118053	3
YFR047C	BNA6	0.104985	0.0276929	0.118053	3
YML086C	ALO1	0.104979	0.110793	0.118053	3
YBR254C	TRS20	0.104862	0.0500204	0.118053	3
YBL070C		0.104847	0.0578441	0.118053	3
YER130C		0.104806	0.119103	0.118053	3
YIL065C	FIS1	0.104685	0.100811	0.156997	2
YAL017W	PSK1	0.104665	0.0947919	0.118053	3
YMR226C		0.104657	0.124849	0.118053	3
YBL096C		0.104563	0.147362	0.118053	3
YER084W		0.104552	0.0446053	0.118053	3
YDR272W	GLO2	0.10453	0.047004	0.156997	2
YBR258C	SHG1	0.104527	0.0205108	0.118053	3
YMR303C	ADH2	0.104406	0.0360833	0.118053	3
YPR097W		0.104281	0.0661103	0.118053	3
YGR015C		0.104129	0.0858719	0.118053	3
YKL124W	SSH4	0.103817	0.0424391	0.118053	3
YKR060W	UTP30	0.103551	0.00958812	0.156997	2
YOR214C		0.103514	0.0781029	0.118053	3
YJL093C	TOK1	0.1035	0.299231	0.118053	3
YGR244C	LSC2	0.103481	0.104666	0.118053	3
YDR187C		0.103455	0.0473632	0.118053	3
YPL052W	OAZ1	0.103418	0.168983	0.118053	3
YER071C		0.103302	0.0470472	0.118053	3
YDR091C	RLI1	0.103182	0.024542	0.118053	3
YJL166W	QCR8	0.102925	0.101773	0.118053	3
YMR160W		0.10292	0.0629666	0.118053	3
YMR034C		0.102865	0.0878743	0.118053	3
YLR073C		0.102821	0.0907912	0.118053	3
YLL009C	COX17	0.102682	0.0386686	0.118053	3
YDR218C	SPR28	0.102554	0.270437	0.118053	3
YML010W-A		0.102436	0.00489889	0.124198	3
YNL162W-A		0.102393	0.0637075	0.124198	3
YER166W	DNF1	0.102291	0.0605056	0.124198	3
YLR344W	RPL26A	0.102264	0.299618	0.124198	3
YLR074C	BUD20	0.10223	0.0754588	0.163282	2
YPR109W		0.102161	0.0350749	0.124198	3
YPL166W	ATG29	0.102004	0.0593126	0.124198	3
YER038C	KRE29	0.101849	0.0289176	0.124198	3
YIL071C	PCI8	0.101658	0.00287455	0.163282	2
YFR015C	GSY1	0.101641	0.112558	0.163282	2
YKR057W	RPS21A	0.101588	0.00459509	0.163282	2
YNL323W	LEM3	0.101556	0.198717	0.124198	3
YDR407C	TRS120	0.101518	0.0284415	0.124198	3
YNR073C		0.101501	0.0413102	0.163282	2
YMR199W	CLN1	0.10132	0.0609557	0.124198	3
YOR107W	RGS2	0.10123	0.131276	0.124198	3
YJL034W	KAR2	0.101076	0.0179892	0.124198	3
YAL049C		0.100674	0.0174129	0.124198	3
YDL050C		0.10067	0.0619889	0.124198	3
YDR241W	BUD26	0.100012	0.307733	0.124198	3
YHR184W	SSP1	0.0999385	0.183033	0.130655	3
YPL103C	FMP30	0.0999025	0.0205518	0.130655	3
YMR277W	FCP1	0.0997671	0.0887418	0.130655	3
YJL004C	SYS1	0.099669	0.146351	0.130655	3
YOR363C	PIP2	0.0995551	0.0483364	0.130655	3
YCL050C	APA1	0.0995459	0.0410488	0.130655	3
YLR063W		0.0995146	0.0211018	0.169927	2
YDR247W	VHS1	0.0992228	0.045879	0.169927	2
YOR027W	STI1	0.0991366	0.116852	0.130655	3
YOR026W	BUB3	0.0989767	0.0976539	0.130655	3
YIL165C		0.0987812	0.0204633	0.130655	3
YDR368W	YPR1	0.0986888	0.00984849	0.130655	3
YOR206W	NOC2	0.0986088	0.0950105	0.130655	3
YGR236C	SPG1	0.0985839	0.0434424	0.169927	2
YPR012W		0.0984605	0.106438	0.130655	3
YNL146C-A		0.0984222	0.00489195	0.130655	3
YDL197C	ASF2	0.0983329	0.0215697	0.130655	3
YPR028W	YOP1	0.0981758	0.292256	0.130655	3
YMR111C		0.0981111	0.0582971	0.130655	3
YLL007C		0.0980503	0.0219943	0.130655	3
YGR225W	AMA1	0.0980327	0.0569033	0.130655	3
YML002W		0.097942	0.119078	0.130655	3
YMR127C	SAS2	0.0978056	0.0235276	0.130655	3
YOR157C	PUP1	0.097632	0.0706704	0.130655	3
YLR054C	OSW2	0.0975709	0.0276247	0.130655	3
YGR122C-A		0.0974217	0.0492253	0.137447	3
YNL314W	DAL82	0.0973989	0.108233	0.137447	3
YMR178W		0.0973304	0.036601	0.137447	3
YNL254C	RTC4	0.0972208	0.14017	0.137447	3
YER128W		0.0969578	0.0125383	0.137447	3
YBR056W		0.096937	0.0690422	0.137447	3
YNL179C		0.0969017	0.354107	0.137447	3
YDR434W	GPI17	0.0968483	0.041382	0.137447	3
YHR181W	SVP26	0.0965555	0.0536762	0.176963	2
YER109C	FLO8	0.0962637	0.0233151	0.137447	3
YPR179C	HDA3	0.0961432	0.0848233	0.137447	3
YGL021W	ALK1	0.0961075	0.0564599	0.137447	3
YBR282W	MRPL27	0.096036	0.0340494	0.137447	3
YJL100W	LSB6	0.0959779	0.126202	0.137447	3
YBL021C	HAP3	0.095958	0.190276	0.137447	3
YDR131C		0.095865	0.0354753	0.137447	3
YGR209C	TRX2	0.0955943	0.0250151	0.137447	3
YDL238C	GUD1	0.0955219	0.124098	0.137447	3
YNL253W	TEX1	0.0954946	0.00882605	0.137447	3
YPL008W	CHL1	0.0954911	0.0324355	0.137447	3
YMR080C	NAM7	0.0953068	0.00750933	0.176963	2
YGR058W	PEF1	0.0951784	0.129069	0.137447	3
YMR194C-A		0.0951202	0.0711232	0.137447	3
YNL101W	AVT4	0.095084	0.15952	0.137447	3
YOL150C		0.09504	0.128377	0.137447	3
YPR147C		0.0950178	0.026426	0.176963	2
YCL060C		0.0949603	0.0599384	0.144599	3
YGR144W	THI4	0.0946939	0.0328842	0.144599	3
YPR052C	NHP6A	0.0946727	0.120763	0.144599	3
YOR221C	MCT1	0.0946558	0.0712864	0.144599	3
YMR115W	MGR3	0.0946547	0.00750027	0.144599	3
YOR066W	MSA1	0.0946395	0.0540692	0.144599	3
YNR067C	DSE4	0.0946209	0.0124734	0.144599	3
YMR244C-A		0.0942781	0.0519003	0.144599	3
YPR103W	PRE2	0.0941517	0.0529661	0.144599	3
YNR027W	BUD17	0.0941012	0.109898	0.144599	3
YGL244W	RTF1	0.0940925	0.0786921	0.144599	3
YPL244C	HUT1	0.0940759	0.0364262	0.144599	3
YPL107W		0.0940583	0.0595225	0.144599	3
YDR115W		0.0940454	0.0483455	0.144599	3
YMR297W	PRC1	0.0938977	0.0519344	0.144599	3
YDL206W		0.0937591	0.0592653	0.144599	3
YER037W	PHM8	0.0936973	0.0965862	0.144599	3
YNL223W	ATG4	0.0936793	0.0853005	0.144599	3
YOR117W	RPT5	0.0935475	0.245949	0.144599	3
YGR182C		0.0935166	0.0500938	0.144599	3
YOL097C	WRS1	0.0934829	0.0464179	0.144599	3
YOR065W	CYT1	0.0934163	0.128413	0.144599	3
YLR374C		0.0933271	0.215954	0.184423	2
YOR215C		0.0933266	0.041225	0.144599	3
YMR257C	PET111	0.0933027	0.399257	0.144599	3
YHL030W	ECM29	0.093145	0.0369246	0.144599	3
YCR073W-A	SOL2	0.0929071	0.149758	0.144599	3
YCR011C	ADP1	0.0928721	0.0182833	0.144599	3
YBR029C	CDS1	0.0927899	0.0582395	0.144599	3
YGR243W	FMP43	0.0927473	0.0557299	0.144599	3
YCR068W	ATG15	0.0927425	0.174804	0.144599	3
YKR044W	UIP5	0.0927051	0.0797002	0.184423	2
YKL019W	RAM2	0.0926621	0.0762046	0.144599	3
YCL016C	DCC1	0.0925699	0.0594171	0.144599	3
YNL213C		0.0924793	0.260835	0.15214	3
YDR219C	MFB1	0.0923217	0.302356	0.15214	3
YAR030C		0.0922986	0.0147976	0.15214	3
YIL129C	TAO3	0.0922377	0.0251179	0.15214	3
YDL045C	FAD1	0.0921663	0.108434	0.15214	3
YBR100W		0.0919353	0.109012	0.15214	3
YLR291C	GCD7	0.0919158	0.0592724	0.15214	3
YJR135C	MCM22	0.0919069	0.164496	0.15214	3
YMR172C-A		0.0918852	0.101215	0.15214	3
YFR053C	HXK1	0.0916951	0.0441733	0.15214	3
YOL088C	MPD2	0.0916509	0.0240999	0.19234	2
YCL036W	GFD2	0.0915943	0.037473	0.15214	3
YGR014W	MSB2	0.0915792	0.0844397	0.15214	3
YMR124W		0.0914964	0.0528754	0.19234	2
YCR036W	RBK1	0.0913003	0.14953	0.15214	3
YIL055C		0.0911206	0.0715194	0.19234	2
YML075C	HMG1	0.0910502	0.230993	0.15214	3
YDR066C	RTR2	0.0910455	0.0508049	0.15214	3
YDR050C	TPI1	0.0910334	0.0243757	0.15214	3
YOR054C	VHS3	0.0906538	0.149892	0.15214	3
YMR018W		0.0906261	0.061909	0.15214	3
YNL207W	RIO2	0.0906026	0.0540968	0.15214	3
YGR121W-A		0.0905869	0.0457205	0.15214	3
YPR108W	RPN7	0.0905284	0.132664	0.15214	3
YBR094W	PBY1	0.0904933	0.0461988	0.15214	3
YJR010W	MET3	0.0904091	0.135079	0.15214	3
YMR088C	VBA1	0.0904056	0.070002	0.19234	2
YJR022W	LSM8	0.0903308	0.0704438	0.15214	3
YGL217C		0.09016	0.0461755	0.15214	3
YMR191W	SPG5	0.0900829	0.091907	0.15214	3
YOL089C	HAL9	0.0899469	0.230971	0.200751	2
YJL087C	TRL1	0.0899123	0.0154187	0.1601	3
YDR179W-A		0.0899108	0.11192	0.1601	3
YHR064C	SSZ1	0.0897911	0.092593	0.1601	3
YJL180C	ATP12	0.0896342	0.0708028	0.1601	3
YKR045C		0.0894497	0.0065192	0.200751	2
YJL203W	PRP21	0.0894148	0.04005	0.1601	3
YKL127W	PGM1	0.0894016	0.149345	0.1601	3
YOL008W	COQ10	0.0893272	0.193397	0.1601	3
YGR278W	CWC22	0.0892367	0.114864	0.1601	3
YBR300C		0.0890717	0.142432	0.1601	3
YLL057C	JLP1	0.0890624	0.0241912	0.1601	3
YMR043W	MCM1	0.089055	0.0221161	0.1601	3
YKL137W	CMC1	0.0890392	0.0618632	0.1601	3
YNR063W		0.0890296	0.0296411	0.1601	3
YHR192W		0.0889026	0.135013	0.1601	3
YDR337W	MRPS28	0.0887075	0.0872489	0.200751	2
YBR108W		0.0887033	0.0310082	0.1601	3
YKR049C	FMP46	0.0886742	0.0387041	0.200751	2
YER147C	SCC4	0.088655	0.015889	0.1601	3
YOR048C	RAT1	0.0886116	0.0869144	0.1601	3
YKR033C		0.0884616	0.0277093	0.200751	2
YOR086C	TCB1	0.0883459	0.266196	0.1601	3
YDL049C	KNH1	0.0883457	0.0664605	0.1601	3
YIL131C	FKH1	0.0882463	0.0780058	0.200751	2
YBR072W	HSP26	0.0881221	0.0680328	0.1601	3
YNL276C		0.0881123	0.173215	0.1601	3
YMR244W		0.0880412	0.0989367	0.1601	3
YGL262W		0.0880249	0.0724199	0.1601	3
YNL231C	PDR16	0.087868	0.0568817	0.1601	3
YCL023C		0.0878628	0.0541353	0.1601	3
YPL104W	MSD1	0.0878543	0.048449	0.1601	3
YPL096C-A	ERI1	0.0878407	0.144999	0.1601	3
YMR083W	ADH3	0.0877085	0.0328005	0.200751	2
YKR097W	PCK1	0.0876959	0.0618684	0.1601	3
YFR054C		0.0876203	0.055209	0.1601	3
YDR522C	SPS2	0.0876069	0.162583	0.1601	3
YOL144W	NOP8	0.0875853	0.230176	0.1601	3
YLR261C	VPS63	0.0875467	0.0882141	0.1601	3
YDL131W	LYS21	0.0875419	0.102074	0.1601	3
YOR268C		0.0874427	0.110266	0.168514	3
YDR326C	YSP2	0.0873115	0.0326395	0.168514	3
YLR050C		0.0872343	0.0515779	0.168514	3
YLR424W	SPP382	0.0870614	0.121888	0.168514	3
YMR302C	YME2	0.0870506	0.0525061	0.168514	3
YPR009W	SUT2	0.0870498	0.138612	0.168514	3
YFR049W	YMR31	0.0870184	0.0706854	0.168514	3
YMR031C		0.0869927	0.077421	0.168514	3
YKR028W	SAP190	0.0868729	0.0514707	0.168514	3
YDR359C	EAF1	0.0868234	0.0415445	0.168514	3
YBL086C		0.0865464	0.0805601	0.168514	3
YNL004W	HRB1	0.0865233	0.0813226	0.168514	3
YNR061C		0.0864459	0.018714	0.168514	3
YMR136W	GAT2	0.0862695	0.0491752	0.168514	3
YPR122W	AXL1	0.0862509	0.0837035	0.168514	3
YLR336C	SGD1	0.0861886	0.0498013	0.168514	3
YHL014C	YLF2	0.0860667	0.0602417	0.168514	3
YOR118W	RTC5	0.0860648	0.18439	0.168514	3
YBR119W	MUD1	0.0860222	0.180912	0.168514	3
YGR102C		0.0860136	0.0262209	0.168514	3
YJL094C	KHA1	0.08585	0.136628	0.168514	3
YML125C	PGA3	0.0856483	0.191278	0.168514	3
YDL071C		0.0855528	0.451386	0.168514	3
YPL113C		0.0853381	0.0361597	0.168514	3
YLR043C	TRX1	0.0853088	0.0499469	0.209691	2
YDR525W	API2	0.0852888	0.153141	0.168514	3
YGL080W	FMP37	0.0852743	0.0860938	0.168514	3
YGL006W-A		0.0852117	0.0330241	0.168514	3
YGR260W	TNA1	0.0851911	0.0372837	0.209691	2
YPL252C	YAH1	0.0850626	0.02005	0.168514	3
YDL072C	YET3	0.085044	0.209361	0.209691	2
YOR316C-A		0.084989	0.0531948	0.177419	3
YKR041W		0.0847257	0.205768	0.177419	3
YNR057C	BIO4	0.0844554	0.121028	0.177419	3
YMR286W	MRPL33	0.0843444	0.30506	0.177419	3
YGL075C	MPS2	0.08427	0.0359958	0.177419	3
YPL149W	ATG5	0.0841092	0.0547604	0.177419	3
YKL146W	AVT3	0.0840587	0.0794387	0.177419	3
YJR153W	PGU1	0.0840303	0.0095304	0.177419	3
YDL219W	DTD1	0.0839315	0.036446	0.177419	3
YNL077W	APJ1	0.0838181	0.017991	0.177419	3
YPR180W	AOS1	0.0837156	0.0803353	0.177419	3
YPL136W		0.0836726	0.019301	0.177419	3
YKR073C		0.0836152	0.0136457	0.219201	2
YPL242C	IQG1	0.0835494	0.0393244	0.177419	3
YMR317W		0.0835128	0.104349	0.177419	3
YLR451W	LEU3	0.0834189	0.0378622	0.177419	3
YDR518W	EUG1	0.0834058	0.102005	0.177419	3
YCL038C	ATG22	0.0833523	0.0623493	0.177419	3
YFR007W	YFH7	0.0833488	0.0309305	0.219201	2
YGL061C	DUO1	0.0832034	0.014241	0.177419	3
YPR178W	PRP4	0.0831683	0.0237374	0.177419	3
YOR081C	TGL5	0.0830625	0.164615	0.177419	3
YNR018W		0.0829009	0.114791	0.177419	3
YKL001C	MET14	0.0828923	0.0301532	0.177419	3
YDL150W	RPC53	0.0828766	0.0820186	0.177419	3
YER149C	PEA2	0.0827518	0.0415589	0.177419	3
YDL079C	MRK1	0.082745	0.0947033	0.177419	3
YKL173W	SNU114	0.0826436	0.0662071	0.177419	3
YFL021W	GAT1	0.0825513	0.0114387	0.219201	2
YLL063C	AYT1	0.082493	0.0469289	0.186857	3
YLR078C	BOS1	0.0822312	0.0212125	0.186857	3
YER085C		0.0821818	0.0406057	0.186857	3
YLR041W		0.0819844	0.0221787	0.186857	3
YHR189W	PTH1	0.0819262	0.0851759	0.186857	3
YPR027C		0.0818153	0.148314	0.186857	3
YBL106C	SRO77	0.0817383	0.0210152	0.229318	2
YMR005W	TAF4	0.0816373	0.0282545	0.186857	3
YGR088W	CTT1	0.0815145	0.0603788	0.186857	3
YER134C		0.0815013	0.0434278	0.186857	3
YNL263C	YIF1	0.0814246	0.0811401	0.186857	3
YAL015C	NTG1	0.081412	0.0840735	0.186857	3
YDL187C		0.0814008	0.0330718	0.186857	3
YGR019W	UGA1	0.0813701	0.0569258	0.186857	3
YGL105W	ARC1	0.0813667	0.0370183	0.186857	3
YGR234W	YHB1	0.0813332	0.163595	0.186857	3
YBR102C	EXO84	0.0812753	0.0216613	0.229318	2
YKL138C	MRPL31	0.0812737	0.0195259	0.186857	3
YDR332W	IRC3	0.0812435	0.064182	0.229318	2
YPR014C		0.0812408	0.127331	0.186857	3
YGR261C	APL6	0.0811549	0.0527216	0.229318	2
YNL240C	NAR1	0.0811504	0.0335789	0.186857	3
YKL206C	ADD66	0.0810271	0.12308	0.229318	2
YDR142C	PEX7	0.081	0.0233331	0.186857	3
YFL035C-B		0.080955	0.0106916	0.229318	2
YJL200C	ACO2	0.0809193	0.0518643	0.186857	3
YBR220C		0.0808761	0.0537015	0.186857	3
YFR045W		0.0807831	0.0203785	0.186857	3
YHR007C-A		0.0807408	0.0355503	0.186857	3
YOR204W	DED1	0.080701	0.137436	0.186857	3
YPR015C		0.080596	0.0638726	0.186857	3
YNR030W	ALG12	0.0805312	0.234451	0.229318	2
YHL010C		0.080509	0.0329575	0.186857	3
YNR012W	URK1	0.0803139	0.0429905	0.186857	3
YMR130W		0.0802435	0.0640403	0.186857	3
YAL056W	GPB2	0.0801906	0.102228	0.186857	3
YJL097W	PHS1	0.080123	0.0472324	0.186857	3
YLR264W	RPS28B	0.0799834	0.132057	0.196872	3
YOL011W	PLB3	0.0797701	0.211173	0.196872	3
YNR041C	COQ2	0.0795669	0.132997	0.196872	3
YDR082W	STN1	0.0795578	0.00893553	0.196872	3
YML110C	COQ5	0.0795451	0.0369185	0.196872	3
YER028C	MIG3	0.0793729	0.0609944	0.196872	3
YPR125W	YLH47	0.0793149	0.0624985	0.196872	3
YNL188W	KAR1	0.0793031	0.0279012	0.196872	3
YFR011C		0.079115	0.0817287	0.196872	3
YMR095C	SNO1	0.0788761	0.0359209	0.196872	3
YPL187W	MF(ALPHA)1	0.078599	0.0335847	0.196872	3
YER106W	MAM1	0.0785285	0.123864	0.196872	3
YNR028W	CPR8	0.0784913	0.104741	0.196872	3
YKL098W	MTC2	0.0783708	0.103391	0.196872	3
YDR330W	UBX5	0.0782843	0.0202825	0.240085	2
YCL011C	GBP2	0.0782813	0.0482228	0.196872	3
YJL132W		0.0782284	0.0441109	0.196872	3
YPR096C		0.0782223	0.067444	0.196872	3
YGR230W	BNS1	0.0781915	0.0702626	0.196872	3
YML054C-A		0.077748	0.0258582	0.196872	3
YOL021C	DIS3	0.0775733	0.0587357	0.196872	3
YOR222W	ODC2	0.0775183	0.00218158	0.196872	3
YIL002C	INP51	0.0774368	0.00847996	0.251541	2
YIR017C	MET28	0.0773863	0.0433448	0.251541	2
YJR094C	IME1	0.0772492	0.042656	0.207509	3
YAL010C	MDM10	0.0771831	0.01625	0.207509	3
YHL021C		0.0771673	0.0252643	0.207509	3
YBR068C	BAP2	0.0768858	0.168387	0.207509	3
YJR112W	NNF1	0.0768672	0.0880665	0.207509	3
YCL017C	NFS1	0.076791	0.0459258	0.207509	3
YPL116W	HOS3	0.0767452	0.0171014	0.207509	3
YBL078C	ATG8	0.076509	0.207781	0.207509	3
YNL105W		0.0764533	0.253304	0.207509	3
YMR102C		0.0763657	0.283694	0.207509	3
YKR054C	DYN1	0.0761154	0.0351863	0.251541	2
YNL206C	RTT106	0.0760688	0.0382849	0.251541	2
YLR049C		0.0760366	0.0438445	0.207509	3
YER119C	AVT6	0.075918	0.0886653	0.207509	3
YGL090W	LIF1	0.0758689	0.0912464	0.207509	3
YPL208W	RKM1	0.0757626	0.0783853	0.207509	3
YGL118C		0.0757317	0.0292256	0.207509	3
YCR024C-A	PMP1	0.0757193	0.0128321	0.207509	3
YBR238C		0.0756213	0.0523959	0.207509	3
YDR417C		0.0756133	0.0325967	0.207509	3
YOL064C	MET22	0.0756124	0.140567	0.207509	3
YGR025W		0.0754815	0.183462	0.207509	3
YDL033C	SLM3	0.0754704	0.108602	0.207509	3
YDR225W	HTA1	0.0754553	0.28882	0.207509	3
YIR021W-A		0.0753769	0.0561399	0.207509	3
YHR114W	BZZ1	0.0753488	0.0255647	0.207509	3
YPR003C		0.0753254	0.186486	0.251541	2
YJR130C	STR2	0.0753039	0.170079	0.207509	3
YML119W		0.0751831	0.0365755	0.207509	3
YNR009W	NRM1	0.0751627	0.0530178	0.207509	3
YDR285W	ZIP1	0.074978	0.0482105	0.263727	2
YER074W	RPS24A	0.0748104	0.058754	0.21882	3
YDR166C	SEC5	0.0747242	0.127096	0.21882	3
YPL125W	KAP120	0.0747221	0.0400049	0.21882	3
YLR397C	AFG2	0.0747004	0.128828	0.21882	3
YPR141C	KAR3	0.0746991	0.0740366	0.21882	3
YHR124W	NDT80	0.0745989	0.0519165	0.21882	3
YDR346C	SVF1	0.0745626	0.044194	0.21882	3
YCL057W	PRD1	0.0745408	0.0206241	0.21882	3
YHR032W		0.0743982	0.0771607	0.21882	3
YLR109W	AHP1	0.0743526	0.0967971	0.21882	3
YCR021C	HSP30	0.0742926	0.00538491	0.21882	3
YDR462W	MRPL28	0.0742923	0.115778	0.263727	2
YDR492W	IZH1	0.0742485	0.116346	0.21882	3
YPR175W	DPB2	0.0742431	0.0199356	0.21882	3
YGL179C	TOS3	0.0742376	0.073315	0.21882	3
YJR045C	SSC1	0.074134	0.0681793	0.21882	3
YPL140C	MKK2	0.0741254	0.0346106	0.21882	3
YJL127C-B		0.0740768	0.0269995	0.21882	3
YNL160W	YGP1	0.0739883	0.010427	0.263727	2
YCL075W		0.0739451	0.0342242	0.21882	3
YLL030C		0.0738141	0.0322248	0.263727	2
YLR052W	IES3	0.0736816	0.126185	0.21882	3
YPL189W	GUP2	0.0735683	0.0504132	0.21882	3
YGR221C	TOS2	0.0735212	0.145868	0.21882	3
YER051W	JHD1	0.0735204	0.0237471	0.263727	2
YAR031W	PRM9	0.0734469	0.0612393	0.21882	3
YPR115W		0.0734031	0.0353787	0.21882	3
YEL059C-A	SOM1	0.0733791	0.0453788	0.21882	3
YOR181W	LAS17	0.0733376	0.136339	0.21882	3
YPL199C		0.073164	0.0606448	0.21882	3
YGR199W	PMT6	0.0731321	0.0037827	0.21882	3
YPR169W	JIP5	0.0730747	0.0418309	0.21882	3
YNL308C	KRI1	0.0729835	0.10589	0.21882	3
YDR055W	PST1	0.0728227	0.0410232	0.21882	3
YER185W	PUG1	0.0727759	0.154899	0.21882	3
YPL133C	RDS2	0.0726718	0.0173991	0.21882	3
YNL309W	STB1	0.0726446	0.0919658	0.21882	3
YJL060W	BNA3	0.0726176	0.0187342	0.21882	3
YER017C	AFG3	0.0724871	0.00563128	0.276684	2
YJR127C	RSF2	0.0724276	0.0329797	0.230858	3
YJL119C		0.072378	0.102446	0.230858	3
YGL058W	RAD6	0.0722655	0.202768	0.230858	3
YNL284C	MRPL10	0.0722621	0.0541331	0.230858	3
YNL222W	SSU72	0.0720167	0.0533862	0.230858	3
YDR529C	QCR7	0.0719955	0.405761	0.276684	2
YBR085W	AAC3	0.071909	0.0434318	0.276684	2
YPL196W	OXR1	0.0717811	0.0713496	0.230858	3
YKL155C	RSM22	0.0716105	0.0711566	0.230858	3
YBR287W		0.0715432	0.0787957	0.230858	3
YGR048W	UFD1	0.0715326	0.0872771	0.230858	3
YFR055W	IRC7	0.0713808	0.0791922	0.230858	3
YOL028C	YAP7	0.0713751	0.059608	0.230858	3
YLR227C	ADY4	0.0713357	0.0775551	0.230858	3
YBL062W		0.0711661	0.14772	0.230858	3
YML042W	CAT2	0.0709788	0.11678	0.230858	3
YOR376W-A		0.0709175	0.0306226	0.230858	3
YIL075C	RPN2	0.0708913	0.0881167	0.230858	3
YDL231C	BRE4	0.0708519	0.0566299	0.230858	3
YPL003W	ULA1	0.0707369	0.0698455	0.230858	3
YJL136W-A		0.070657	0.0886204	0.230858	3
YPR157W		0.0706257	0.0791715	0.230858	3
YHL016C	DUR3	0.0703075	0.0603165	0.230858	3
YHR094C	HXT1	0.0702642	0.0149299	0.230858	3
YMR279C		0.0701746	0.0601426	0.230858	3
YDR361C	BCP1	0.0701099	0.0771725	0.230858	3
YKL010C	UFD4	0.0700825	0.0484937	0.230858	3
YMR003W		0.070053	0.176935	0.230858	3
YFR043C	IRC6	0.0699682	0.157342	0.243678	3
YFR012W		0.0698672	0.00690338	0.290452	2
YHR049C-A		0.069612	0.115787	0.243678	3
YIR018C-A		0.0695762	0.0227574	0.243678	3
YMR267W	PPA2	0.0695674	0.499231	0.243678	3
YGR109C	CLB6	0.0695599	0.0343087	0.243678	3
YIL105C	SLM1	0.0694109	0.106103	0.243678	3
YOR374W	ALD4	0.0694086	0.0065135	0.243678	3
YMR193W	MRPL24	0.0692847	0.0354192	0.243678	3
YOR037W	CYC2	0.0692718	0.1205	0.243678	3
YHR156C	LIN1	0.0692377	0.0342749	0.243678	3
YOR334W	MRS2	0.0691621	0.1131	0.243678	3
YLL054C		0.0690357	0.0831987	0.243678	3
YML116W	ATR1	0.0689579	0.0403851	0.243678	3
YCR052W	RSC6	0.0688889	0.0442368	0.243678	3
YMR052W	FAR3	0.0688128	0.165693	0.243678	3
YJL146W	IDS2	0.0687705	0.0356345	0.243678	3
YFR046C	CNN1	0.0687193	0.0844995	0.243678	3
YDR063W		0.0687014	0.0329713	0.243678	3
YDR508C	GNP1	0.0686774	0.285249	0.243678	3
YMR266W	RSN1	0.0686607	0.148573	0.243678	3
YER075C	PTP3	0.0686259	0.0140075	0.243678	3
YFR038W	IRC5	0.0685903	0.0242464	0.243678	3
YBL084C	CDC27	0.0685433	0.0560235	0.243678	3
YDR214W	AHA1	0.0685087	0.0888478	0.243678	3
YBR033W	EDS1	0.0684542	0.0137125	0.243678	3
YNR043W	MVD1	0.0684256	0.0819256	0.243678	3
YNR003C	RPC34	0.0683389	0.0251563	0.243678	3
YMR182W-A		0.0682827	0.00943428	0.243678	3
YFR010W	UBP6	0.0680893	0.0370915	0.290452	2
YIL028W		0.0680685	0.161699	0.290452	2
YCR059C	YIH1	0.0680379	0.152505	0.243678	3
YLR199C	PBA1	0.0680235	0.103172	0.290452	2
YMR154C	RIM13	0.0679088	0.187555	0.243678	3
YER032W	FIR1	0.0678828	0.029071	0.243678	3
YNL247W		0.0678409	0.0214508	0.243678	3
YOR064C	YNG1	0.067538	0.0489584	0.243678	3
YKR068C	BET3	0.0675161	0.0646761	0.243678	3
YDR533C	HSP31	0.0674531	0.0270942	0.257335	3
YHR161C	YAP1801	0.0672748	0.0154291	0.257335	3
YBR008C	FLR1	0.0672249	0.0485657	0.257335	3
YFL046W	FMP32	0.0671549	0.0650022	0.30507	2
YPL119C-A		0.067069	0.0971147	0.257335	3
YBR213W	MET8	0.0670358	0.0104798	0.257335	3
YOR298C-A	MBF1	0.0669379	0.0847475	0.257335	3
YLR438W	CAR2	0.0669156	0.0737764	0.257335	3
YOR352W		0.066912	0.148011	0.257335	3
YBR106W	PHO88	0.066882	0.0809873	0.257335	3
YER003C	PMI40	0.0668744	0.095755	0.257335	3
YDR288W	NSE3	0.0667348	0.0217111	0.257335	3
YER054C	GIP2	0.0667332	0.0272621	0.257335	3
YER096W	SHC1	0.0666675	0.0673265	0.257335	3
YPL261C		0.0666369	0.116131	0.257335	3
YKR003W	OSH6	0.0665238	0.0178854	0.30507	2
YGL245W	GUS1	0.0664707	0.0906784	0.257335	3
YLR254C	NDL1	0.0664507	0.0300556	0.257335	3
YLR194C		0.0661758	0.152105	0.257335	3
YOR353C	SOG2	0.0661586	0.0690406	0.257335	3
YCR010C	ADY2	0.0660295	0.0262507	0.257335	3
YMR134W		0.0659861	0.100253	0.257335	3
YJL073W	JEM1	0.0658412	0.134732	0.257335	3
YHR197W	RIX1	0.0658156	0.0116808	0.257335	3
YCR043C		0.0657834	0.0452792	0.257335	3
YBR241C		0.0656297	0.0444116	0.257335	3
YNR038W	DBP6	0.0655996	0.0459747	0.257335	3
YDR520C	URC2	0.0655893	0.0323098	0.257335	3
YNL158W	PGA1	0.0655728	0.0120909	0.257335	3
YBL059W		0.0655362	0.125885	0.257335	3
YBR180W	DTR1	0.0654212	0.0602227	0.257335	3
YLR036C		0.0653173	0.0118905	0.30507	2
YDL235C	YPD1	0.0652669	0.065905	0.257335	3
YGR171C	MSM1	0.0652157	0.0712875	0.257335	3
YPL235W	RVB2	0.0651974	0.0684346	0.257335	3
YBR168W	PEX32	0.0651392	0.329186	0.257335	3
YNL007C	SIS1	0.0651239	0.0288454	0.257335	3
YHR093W	AHT1	0.0650907	0.0648179	0.257335	3
YDR445C		0.0650767	0.0443847	0.257335	3
YJL007C		0.0650675	0.0249806	0.257335	3
YCL009C	ILV6	0.0649886	0.135844	0.27189	3
YDL056W	MBP1	0.0649081	0.0883473	0.27189	3
YHR014W	SPO13	0.0649042	0.0362345	0.27189	3
YGL022W	STT3	0.0648831	0.0356224	0.27189	3
YKL021C	MAK11	0.0648321	0.0836683	0.27189	3
YJL211C		0.0648115	0.0743419	0.27189	3
YDL059C	RAD59	0.0647476	0.0261157	0.27189	3
YDR144C	MKC7	0.0646522	0.0343327	0.27189	3
YHR098C	SFB3	0.0645868	0.12967	0.27189	3
YPL171C	OYE3	0.0645405	0.0505479	0.27189	3
YDR111C	ALT2	0.0645393	0.039054	0.27189	3
YBR075W		0.0645309	0.0106207	0.27189	3
YDR154C		0.0642158	0.094106	0.27189	3
YLR033W	RSC58	0.0642113	0.0651274	0.27189	3
YMR234W	RNH1	0.0640178	0.0919955	0.27189	3
YIL163C		0.0639789	0.163226	0.27189	3
YGR138C	TPO2	0.0639492	0.0576302	0.27189	3
YNL070W	TOM7	0.0639466	0.0393648	0.27189	3
YJL197W	UBP12	0.0639333	0.0920319	0.27189	3
YGR258C	RAD2	0.0638959	0.109419	0.27189	3
YLR321C	SFH1	0.063696	0.090621	0.27189	3
YPL015C	HST2	0.0636504	0.0419785	0.27189	3
YDR523C	SPS1	0.0634771	0.0433284	0.27189	3
YMR039C	SUB1	0.0634128	0.0944372	0.27189	3
YJR060W	CBF1	0.0633821	0.0101139	0.27189	3
YCR025C		0.0632717	0.0323352	0.27189	3
YNL064C	YDJ1	0.0631182	0.120961	0.320573	2
YML078W	CPR3	0.0630648	0.0607517	0.27189	3
YJR011C		0.0629703	0.268945	0.27189	3
YBR235W		0.0629581	0.0420079	0.27189	3
YHL015W-A		0.0627149	0.0429977	0.27189	3
YOR052C		0.0625135	0.0850587	0.27189	3
YJL047C-A		0.0624796	0.0235926	0.287399	3
YDR143C	SAN1	0.0623749	0.0140687	0.287399	3
YAL029C	MYO4	0.0623393	0.0798282	0.287399	3
YGR123C	PPT1	0.0622848	0.0301197	0.287399	3
YKL018C-A		0.0621774	0.052604	0.287399	3
YJL172W	CPS1	0.0621682	0.0335866	0.336997	2
YDL203C	ACK1	0.0621382	0.103098	0.287399	3
YMR078C	CTF18	0.0621353	0.0474438	0.336997	2
YER067C-A		0.0620305	0.0280049	0.287399	3
YJL072C	PSF2	0.0619891	0.0136877	0.287399	3
YML043C	RRN11	0.0619456	0.110168	0.287399	3
YER016W	BIM1	0.0618077	0.0910761	0.287399	3
YFL034C-A	RPL22B	0.0617117	0.0480273	0.287399	3
YCL001W-A		0.0616813	0.112805	0.287399	3
YOR161C-C		0.0616576	0.037159	0.287399	3
YDR210W		0.061566	0.211574	0.287399	3
YMR196W		0.0615598	0.122534	0.287399	3
YDL216C	RRI1	0.0614523	0.0267963	0.287399	3
YER019W	ISC1	0.0613844	0.117218	0.287399	3
YER163C		0.061266	0.072808	0.287399	3
YBR218C	PYC2	0.0612386	0.0654002	0.287399	3
YJL106W	IME2	0.0612125	0.00641478	0.336997	2
YJL195C		0.0612106	0.0623362	0.287399	3
YPL013C	MRPS16	0.0611235	0.045117	0.287399	3
YER024W	YAT2	0.0611195	0.0434055	0.287399	3
YJL209W	CBP1	0.061004	0.109678	0.287399	3
YCL037C	SRO9	0.0608901	0.177616	0.287399	3
YML126C	ERG13	0.0608871	0.241796	0.287399	3
YLL006W	MMM1	0.0607666	0.0536502	0.287399	3
YJR151C	DAN4	0.0606609	0.0589253	0.287399	3
YPL167C	REV3	0.0606036	0.0400917	0.287399	3
YER153C	PET122	0.0605814	0.100265	0.287399	3
YNL155W		0.0605764	0.051138	0.336997	2
YAL059W	ECM1	0.0605616	0.0908676	0.287399	3
YBR172C	SMY2	0.0605361	0.0784516	0.287399	3
YAL034C	FUN19	0.0605315	0.0775995	0.287399	3
YBR206W		0.0605114	0.0572458	0.287399	3
YJL027C		0.0604898	0.0411259	0.287399	3
YLL010C	PSR1	0.0603026	0.0510537	0.287399	3
YKL030W		0.0602146	0.0177031	0.287399	3
YGL142C	GPI10	0.0600406	0.0381388	0.287399	3
YJR068W	RFC2	0.0599826	0.0107176	0.303922	3
YFL050C	ALR2	0.0599554	0.0160444	0.354372	2
YPR017C	DSS4	0.0599169	0.122253	0.303922	3
YBR285W		0.0598902	0.0470704	0.303922	3
YMR169C	ALD3	0.0598601	0.0383916	0.303922	3
YDL159W-A		0.0598321	0.071309	0.303922	3
YFL017C	GNA1	0.0598298	0.0137057	0.303922	3
YMR103C		0.0598108	0.102324	0.303922	3
YLR089C	ALT1	0.0597793	0.043042	0.303922	3
YMR075C-A		0.059661	0.00429797	0.354372	2
YLR409C	UTP21	0.0596433	0.0647355	0.303922	3
YML120C	NDI1	0.0596322	0.0302501	0.303922	3
YFL024C	EPL1	0.0595538	0.0488559	0.303922	3
YNL046W		0.0595029	0.0249444	0.303922	3
YBL095W		0.0594853	0.160251	0.303922	3
YDL186W		0.059452	0.0587086	0.303922	3
YHR151C	MTC6	0.0593315	0.0984616	0.303922	3
YIL046W	MET30	0.0592208	0.036527	0.303922	3
YIL115C	NUP159	0.0591072	0.0473927	0.303922	3
YPL109C		0.059101	0.0957875	0.303922	3
YDL011C		0.0590272	0.0662501	0.303922	3
YOR073W	SGO1	0.0590263	0.0910664	0.303922	3
YGL194C	HOS2	0.0590214	0.187545	0.303922	3
YMR011W	HXT2	0.0590142	0.0242591	0.303922	3
YDL241W		0.0588884	0.0501447	0.303922	3
YFL009W	CDC4	0.0588644	0.0256892	0.303922	3
YLR008C	PAM18	0.0585826	0.0199596	0.303922	3
YPL089C	RLM1	0.0585401	0.183426	0.303922	3
YDR044W	HEM13	0.0585383	0.0411557	0.303922	3
YNR064C		0.0584142	0.0281172	0.303922	3
YHR062C	RPP1	0.0583986	0.113135	0.303922	3
YIL019W	FAF1	0.0583467	0.068454	0.303922	3
YDL154W	MSH5	0.0582496	0.0209031	0.303922	3
YPR119W	CLB2	0.0582381	0.116912	0.303922	3
YER066C-A		0.0582281	0.0614385	0.303922	3
YDL024C	DIA3	0.0579805	0.0935124	0.303922	3
YNL047C	SLM2	0.0579477	0.181436	0.303922	3
YLR241W		0.0578922	0.0302142	0.303922	3
YNL291C	MID1	0.0578772	0.105775	0.354372	2
YJL135W		0.0577604	0.0572174	0.303922	3
YNL159C	ASI2	0.0577403	0.159609	0.354372	2
YLR024C	UBR2	0.0576289	0.0580695	0.303922	3
YOR261C	RPN8	0.0575922	0.145474	0.303922	3
YFR027W	ECO1	0.0575871	0.0485018	0.303922	3
YLR121C	YPS3	0.0574142	0.145808	0.321515	3
YKL052C	ASK1	0.0573474	0.0652281	0.321515	3
YBL014C	RRN6	0.0572026	0.0643777	0.321515	3
YHR139C	SPS100	0.0569799	0.0110068	0.321515	3
YFR028C	CDC14	0.05678	0.190202	0.321515	3
YFL020C	PAU5	0.056724	0.0333763	0.372727	2
YGR113W	DAM1	0.0566832	0.139891	0.321515	3
YOL025W	LAG2	0.0565924	0.2021	0.321515	3
YMR012W	CLU1	0.0565909	0.0703738	0.321515	3
YDL027C		0.0565775	0.0729947	0.321515	3
YDR354W	TRP4	0.0565437	0.0290397	0.321515	3
YCR046C	IMG1	0.0564792	0.0662127	0.321515	3
YPR098C		0.0564119	0.0514993	0.321515	3
YBR071W		0.0563547	0.031874	0.321515	3
YMR231W	PEP5	0.0563167	0.0272573	0.321515	3
YOR232W	MGE1	0.056125	0.0887115	0.321515	3
YGR158C	MTR3	0.0560942	0.146633	0.321515	3
YCL035C	GRX1	0.0560542	0.152903	0.321515	3
YNL282W	POP3	0.0560538	0.0298842	0.321515	3
YGL091C	NBP35	0.0560453	0.0753075	0.321515	3
YOR230W	WTM1	0.0559729	0.163401	0.321515	3
YML033W		0.0559505	0.0427374	0.321515	3
YML029W	USA1	0.055941	0.0484535	0.321515	3
YLR400W		0.0558979	0.0554226	0.321515	3
YDR358W	GGA1	0.0558208	0.0354564	0.321515	3
YHR011W	DIA4	0.0557362	0.0357807	0.372727	2
YLR367W	RPS22B	0.0557173	0.072757	0.321515	3
YBR272C	HSM3	0.0556944	0.180056	0.321515	3
YFR037C	RSC8	0.0556621	0.0651452	0.321515	3
YGL114W		0.0554944	0.101071	0.321515	3
YLL023C		0.0552659	0.0558528	0.321515	3
YOL094C	RFC4	0.0551844	0.0110908	0.321515	3
YDR215C		0.05516	0.0350929	0.321515	3
YDL040C	NAT1	0.0550199	0.137531	0.321515	3
YEL040W	UTR2	0.0549874	0.0357031	0.340233	3
YPL265W	DIP5	0.0549634	0.0976549	0.340233	3
YDR133C		0.0549552	0.0308059	0.340233	3
YOR228C		0.0548515	0.0704006	0.340233	3
YLR126C		0.0548285	0.0427241	0.340233	3
YEL010W		0.0548046	0.0171685	0.340233	3
YLL061W	MMP1	0.0546947	0.071145	0.340233	3
YMR197C	VTI1	0.0546236	0.113121	0.340233	3
YDR515W	SLF1	0.0546131	0.0485182	0.340233	3
YER057C	HMF1	0.0545508	0.0288017	0.340233	3
YEL042W	GDA1	0.0545498	0.05312	0.340233	3
YOR149C	SMP3	0.0544936	0.144593	0.340233	3
YLR272C	YCS4	0.0544928	0.114198	0.340233	3
YLL060C	GTT2	0.0544564	0.0574305	0.340233	3
YBR250W	SPO23	0.0544422	0.0607322	0.340233	3
YBR223C	TDP1	0.0544096	0.0526425	0.340233	3
YCL062W		0.0544019	0.0433834	0.340233	3
YDR338C		0.0543403	0.0390611	0.340233	3
YGL017W	ATE1	0.0542764	0.0451259	0.340233	3
YHL040C	ARN1	0.054267	0.0652959	0.340233	3
YFR012W-A		0.0542224	0.0555351	0.340233	3
YPL004C	LSP1	0.0541782	0.199772	0.340233	3
YPL182C		0.0540805	0.0662572	0.340233	3
YPR074C	TKL1	0.0540083	0.19094	0.340233	3
YPL241C	CIN2	0.0536715	0.0800155	0.340233	3
YML129C	COX14	0.0536641	0.153352	0.340233	3
YLR217W		0.0535391	0.0574185	0.340233	3
YDR113C	PDS1	0.053521	0.0431027	0.340233	3
YGR146C-A		0.053415	0.0333078	0.340233	3
YFL043C		0.0533232	0.0743168	0.392086	2
YKL022C	CDC16	0.053254	0.0325001	0.340233	3
YPR033C	HTS1	0.0530668	0.0388073	0.340233	3
YKL033W-A		0.0530456	0.0637717	0.340233	3
YML023C	NSE5	0.0530075	0.174677	0.340233	3
YNL039W	BDP1	0.05297	0.0170581	0.340233	3
YML077W	BET5	0.0529272	0.18283	0.340233	3
YHR079C	IRE1	0.0529202	0.0471282	0.340233	3
YER047C	SAP1	0.0528313	0.0254008	0.340233	3
YPR077C		0.0527591	0.0601965	0.340233	3
YER053C-A		0.0527166	0.0209329	0.340233	3
YHR171W	ATG7	0.0526915	0.249359	0.392086	2
YPL016W	SWI1	0.0526152	0.0664592	0.340233	3
YNL050C		0.0525604	0.0212989	0.340233	3
YPR190C	RPC82	0.0525278	0.0218499	0.340233	3
YDL220C	CDC13	0.0524543	0.0228161	0.360126	3
YMR097C	MTG1	0.0523854	0.171018	0.360126	3
YOR329C	SCD5	0.0521291	0.0752251	0.360126	3
YNL015W	PBI2	0.0521195	0.0471457	0.360126	3
YIL171W		0.052082	0.066768	0.360126	3
YEL041W	YEF1	0.0520419	0.0592935	0.360126	3
YCL006C		0.0519423	0.0378211	0.360126	3
YLR310C	CDC25	0.0519257	0.112188	0.360126	3
YLL049W	LDB18	0.0519085	0.0193102	0.360126	3
YDL080C	THI3	0.0518715	0.0810079	0.360126	3
YIL141W		0.0518657	0.015798	0.360126	3
YPL162C		0.0518402	0.0435558	0.360126	3
YPR111W	DBF20	0.0518312	0.0870858	0.360126	3
YPR134W	MSS18	0.051783	0.17645	0.412468	2
YPR079W	MRL1	0.0517055	0.0960561	0.360126	3
YML017W	PSP2	0.0516834	0.0600909	0.360126	3
YML080W	DUS1	0.0516021	0.0900686	0.360126	3
YML007C-A		0.0515414	0.138887	0.360126	3
YAR020C	PAU7	0.0514612	0.0207748	0.360126	3
YHR120W	MSH1	0.0514233	0.0662214	0.360126	3
YLR419W		0.0513525	0.0715698	0.360126	3
YMR121C	RPL15B	0.0513511	0.0831852	0.360126	3
YGR232W	NAS6	0.0513256	0.115366	0.360126	3
YDL019C	OSH2	0.0512147	0.0315801	0.360126	3
YMR192W	GYL1	0.0510405	0.0247563	0.360126	3
YGR200C	ELP2	0.051	0.0371789	0.360126	3
YBR217W	ATG12	0.0509794	0.0307554	0.360126	3
YIR039C	YPS6	0.0509579	0.0638254	0.412468	2
YHR086W-A		0.050761	0.142092	0.360126	3
YAR050W	FLO1	0.050751	0.0410277	0.360126	3
YJR110W	YMR1	0.0507484	0.118663	0.360126	3
YBR197C		0.0507109	0.0370436	0.360126	3
YKL037W		0.0505692	0.10869	0.360126	3
YER170W	ADK2	0.0504356	0.0330033	0.360126	3
YGL060W	YBP2	0.0504148	0.0308589	0.360126	3
YLR305C	STT4	0.0503361	0.0883334	0.360126	3
YLR112W		0.0503054	0.091835	0.360126	3
YDR496C	PUF6	0.050238	0.359663	0.360126	3
YBR052C	RFS1	0.0502174	0.0912181	0.360126	3
YMR315W-A		0.0502145	0.137689	0.360126	3
YLR415C		0.0501168	0.0255261	0.360126	3
YLL012W	YEH1	0.0500774	0.140824	0.360126	3
YOL069W	NUF2	0.0500468	0.0562086	0.360126	3
YLR088W	GAA1	0.0500096	0.0735744	0.412468	2
YML104C	MDM1	0.0499677	0.0320475	0.381241	3
YNL279W	PRM1	0.049951	0.0802348	0.381241	3
YOR265W	RBL2	0.0499278	0.123668	0.381241	3
YBR073W	RDH54	0.0499158	0.0467181	0.381241	3
YOR373W	NUD1	0.0499023	0.0495737	0.381241	3
YJR075W	HOC1	0.0498761	0.0167602	0.381241	3
YJR143C	PMT4	0.0498551	0.0957826	0.381241	3
YOR110W	TFC7	0.0497615	0.101999	0.381241	3
YNR017W	TIM23	0.0497415	0.0434202	0.381241	3
YOR049C	RSB1	0.0496743	0.103032	0.381241	3
YBR240C	THI2	0.0495605	0.0511694	0.381241	3
YOR377W	ATF1	0.0495338	0.135671	0.381241	3
YDL214C	PRR2	0.0494804	0.0294192	0.381241	3
YDR132C		0.0493956	0.0117698	0.381241	3
YMR318C	ADH6	0.0493722	0.0834117	0.381241	3
YGL044C	RNA15	0.049298	0.0359412	0.381241	3
YHR137W	ARO9	0.0492753	0.0591115	0.381241	3
YDR468C	TLG1	0.0492538	0.0212721	0.381241	3
YKL128C	PMU1	0.0491614	0.0408828	0.381241	3
YGR010W	NMA2	0.0491519	0.158115	0.381241	3
YBR265W	TSC10	0.0490353	0.0866183	0.381241	3
YNL273W	TOF1	0.0489814	0.194452	0.381241	3
YLR444C		0.0489478	0.0657438	0.381241	3
YJL050W	MTR4	0.04891	0.0677996	0.381241	3
YMR194C-B		0.0489046	0.0183262	0.381241	3
YJL123C	MTC1	0.048823	0.0487986	0.381241	3
YOL046C		0.0487795	0.101591	0.381241	3
YFL007W	BLM10	0.0486712	0.0634229	0.381241	3
YPL112C	PEX25	0.0486262	0.0686385	0.381241	3
YGR174C	CBP4	0.0486159	0.0307431	0.381241	3
YFL027C	GYP8	0.0486022	0.0100887	0.433888	2
YER121W		0.0484965	0.0536198	0.381241	3
YKR037C	SPC34	0.0482432	0.054859	0.381241	3
YPL030W	TRM44	0.0482394	0.0544595	0.381241	3
YOR361C	PRT1	0.0480066	0.258054	0.381241	3
YGL243W	TAD1	0.0479766	0.132212	0.381241	3
YGR100W	MDR1	0.0478588	0.0400126	0.381241	3
YHR112C		0.0477927	0.0336779	0.381241	3
YDL042C	SIR2	0.047719	0.0658877	0.433888	2
YPL122C	TFB2	0.0476955	0.117912	0.381241	3
YDR104C	SPO71	0.0476916	0.0481429	0.381241	3
YJR069C	HAM1	0.0476898	0.0867756	0.381241	3
YKL096W-A	CWP2	0.0475446	0.0498415	0.381241	3
YMR316C-B		0.0474855	0.0809058	0.403618	3
YLR013W	GAT3	0.0474325	0.0529771	0.403618	3
YER062C	HOR2	0.0473362	0.0543956	0.403618	3
YBR280C	SAF1	0.0473341	0.0531311	0.403618	3
YKR098C	UBP11	0.0472665	0.135787	0.403618	3
YMR306W	FKS3	0.0472068	0.0654641	0.403618	3
YJL139C	YUR1	0.0470448	0.122154	0.403618	3
YBL055C		0.0470187	0.050847	0.403618	3
YGL068W	MNP1	0.0470018	0.0584006	0.403618	3
YAR037W		0.0469994	0.102088	0.403618	3
YDR292C	SRP101	0.0469823	0.0556565	0.403618	3
YER123W	YCK3	0.0468531	0.15344	0.403618	3
YOL116W	MSN1	0.0468292	0.139829	0.403618	3
YER077C		0.0466301	0.096232	0.403618	3
YER181C		0.0465965	0.178042	0.403618	3
YDR478W	SNM1	0.0465317	0.0233786	0.403618	3
YDR254W	CHL4	0.0465012	0.0487222	0.456354	2
YCL054W	SPB1	0.0464917	0.0341468	0.403618	3
YNR059W	MNT4	0.046486	0.0287734	0.403618	3
YJL028W		0.0464485	0.034893	0.403618	3
YPL272C		0.0463617	0.11074	0.403618	3
YBR263W	SHM1	0.0463226	0.0214276	0.403618	3
YNL088W	TOP2	0.0462297	0.059039	0.403618	3
YLR422W		0.0461647	0.0191315	0.403618	3
YML058W-A	HUG1	0.045992	0.023256	0.403618	3
YHL024W	RIM4	0.0459704	0.0533596	0.403618	3
YCR073C	SSK22	0.045936	0.101511	0.403618	3
YKL106C-A		0.0459271	0.0800173	0.403618	3
YMR262W		0.0459102	0.10751	0.403618	3
YLR211C		0.0458509	0.0352811	0.403618	3
YCR007C		0.0457867	0.0744597	0.403618	3
YJL054W	TIM54	0.0455354	0.0462312	0.403618	3
YMR022W	UBC7	0.0453793	0.022659	0.403618	3
YCR014C	POL4	0.0453154	0.0259384	0.403618	3
YPL189C-A	COA2	0.0452507	0.0237037	0.403618	3
YDR231C	COX20	0.0452135	0.185224	0.456354	2
YDR059C	UBC5	0.045135	0.0781693	0.403618	3
YMR158C-B		0.0451079	0.0108233	0.403618	3
YNL024C		0.0450925	0.0625513	0.403618	3
YMR294W-A		0.0450347	0.027195	0.403618	3
YKL042W	SPC42	0.0448712	0.0587156	0.42729	3
YOR278W	HEM4	0.0448218	0.177108	0.42729	3
YDR422C	SIP1	0.0447956	0.0976571	0.42729	3
YGR147C	NAT2	0.0447844	0.0873778	0.42729	3
YIL027C	KRE27	0.0446886	0.0795701	0.479868	2
YAR035C-A		0.0446841	0.0495616	0.479868	2
YNL117W	MLS1	0.0446684	0.0755722	0.42729	3
YEL065W	SIT1	0.0445674	0.0570866	0.42729	3
YER056C	FCY2	0.0445661	0.231183	0.42729	3
YGR292W	MAL12	0.0445365	0.0800701	0.42729	3
YMR310C		0.0444404	0.064178	0.42729	3
YMR010W		0.0443775	0.121475	0.42729	3
YPR200C	ARR2	0.0443751	0.0948603	0.42729	3
YBR163W	DEM1	0.0443466	0.0928468	0.42729	3
YBR061C	TRM7	0.0442877	0.0951858	0.42729	3
YPR137W	RRP9	0.0442539	0.0267671	0.42729	3
YJL074C	SMC3	0.0441911	0.0341731	0.42729	3
YPL152W-A		0.0441906	0.0781742	0.42729	3
YJR095W	SFC1	0.0441067	0.0190566	0.42729	3
YDL178W	DLD2	0.0440833	0.0480123	0.42729	3
YDL008W	APC11	0.0440294	0.0140882	0.42729	3
YDR061W		0.0440081	0.0970469	0.42729	3
YCR090C		0.0440048	0.0498789	0.42729	3
YBR153W	RIB7	0.0439031	0.0382715	0.42729	3
YGL138C		0.0438034	0.152612	0.42729	3
YMR320W		0.0437837	0.0911514	0.42729	3
YKL201C	MNN4	0.0437493	0.0590916	0.42729	3
YNL329C	PEX6	0.0437247	0.203908	0.42729	3
YLR277C	YSH1	0.0437194	0.0234821	0.42729	3
YGR073C		0.043695	0.120441	0.42729	3
[truncated: 3,333 more rows]

## Sheet: mean ratio>0 p<0.001_1 mM Pi
Gene_systematic name	Gene_generic name	average_log2(YFP/RFP) (0=wild type in 1mM Pi)	standard deviation_log2(YFP/RFP)	p-value of measurement errors	detected number
YPL031C	PHO85	7.46017	0.223107	0	3
YOL001W	PHO80	7.43813	0.387352	0	2
YDR226W	ADK1	5.51916	0.699749	0	3
YJR105W	ADO1	5.53564	0.279153	1.04291e-266	2
YPR007C	REC8	4.46716	3.96082	3.97944e-261	3
YNL141W	AAH1	3.91567	0.246864	1.00612e-201	3
YJL198W	PHO90	3.8273	0.812436	9.59688e-193	3
YMR060C	SAM37	2.65546	1.73763	5.73597e-95	3
YOR187W	TUF1	2.53546	0.196907	6.27088e-87	3
YOR200W		2.4196	0.150331	2.04243e-79	3
YIL018W	RPL2B	2.26637	0.971147	3.40504e-70	3
YKR084C	HBS1	2.51285	0.105184	1.39127e-57	2
YCR024C	SLM5	1.83512	0.641124	2.09415e-47	3
YER087W		1.80929	0.642156	4.1411e-46	3
YJL101C	GSH1	2.12929	0.955742	3.52343e-42	2
YCR037C	PHO87	1.65325	0.938544	3.63159e-39	3
YBL006C	LDB7	1.96512	0.947861	1.94345e-36	2
YIL030C	SSM4	1.36698	2.46223	6.46175e-28	3
YDR159W	SAC3	1.3445	0.0532078	3.99645e-27	3
YIL058W		1.30007	2.1151	1.15118e-25	3
YHL020C	OPI1	1.22902	0.194859	2.78285e-23	3
YOL072W	THP1	1.22372	0.333214	4.01716e-23	3
YBR077C	SLM4	1.17151	2.31844	1.73571e-21	3
YML062C	MFT1	1.09322	0.0407771	3.35464e-19	3
YKL204W	EAP1	1.36823	0.0193304	3.39462e-19	2
YOR340C	RPA43	1.03599	0.0553818	1.32792e-17	3
YPR022C		1.03553	0.403526	1.32792e-17	3
YNR052C	POP2	1.03418	0.767486	1.5514e-17	3
YNR024W	MPP6	1.01071	2.01164	6.18821e-17	3
YPR110C	RPC40	0.993732	0.13858	1.77832e-16	3
YNL080C	EOS1	1.23197	0.0452176	4.36741e-16	2
YDR363W-A	SEM1	0.924041	0.226091	1.01442e-14	3
YDR244W	PEX5	1.10299	0.0687756	1.72933e-13	2
YPL179W	PPQ1	1.09774	0.0369407	2.15853e-13	2
YGL054C	ERV14	0.854761	0.315107	4.35181e-13	3
YIL020C	HIS6	1.06616	0.0305404	8.90672e-13	2
YGR164W		0.832846	0.815074	1.2091e-12	3
YOR136W	IDH2	0.79613	0.305091	7.72097e-12	3
YIL043C	CBR1	1.01432	0.16236	8.06381e-12	2
YNL037C	IDH1	0.787219	0.238259	1.24883e-11	3
YOR322C	LDB19	0.786584	0.296437	1.24883e-11	3
YNL076W	MKS1	0.779632	0.186986	1.78448e-11	3
YER091C	MET6	0.772102	0.257502	2.54177e-11	3
YNL280C	ERG24	0.771347	0.056693	2.54177e-11	3
YOR246C		0.757565	0.141485	4.55121e-11	3
YML035C	AMD1	0.751241	1.33848	6.42834e-11	3
YNL229C	URE2	0.742155	0.504348	1.01379e-10	3
YIL153W	RRD1	0.738632	0.168278	1.1351e-10	3
YOL002C	IZH2	0.735699	0.141094	1.2705e-10	3
YAL021C	CCR4	0.935338	0.205759	1.71555e-10	2
YOR199W		0.716271	0.276018	3.09126e-10	3
YPL055C	LGE1	0.714379	0.352915	3.4494e-10	3
YLR015W	BRE2	0.699475	0.100626	6.61225e-10	3
YNL220W	ADE12	0.694734	0.174858	8.19225e-10	3
YHR183W	GND1	0.885431	0.309801	1.0907e-09	2
YKL053W		0.68514	0.184544	1.12699e-09	3
YHL015W	RPS20	0.679926	0.302784	1.5459e-09	3
YCR062W		0.664137	0.731701	2.88393e-09	3
YDR497C	ITR1	0.65897	1.48896	3.54139e-09	3
YOR070C	GYP1	0.655069	0.241032	3.92255e-09	3
YNL147W	LSM7	0.648519	0.164811	5.32069e-09	3
YNL089C		0.62358	0.263435	1.44225e-08	3
YBL103C	RTG3	0.808297	0.0485677	1.58631e-08	2
YOR242C	SSP2	0.618942	0.114352	1.75462e-08	3
YDR028C	REG1	0.790482	0.0516463	2.81262e-08	2
YNR047W	FPK1	0.59989	0.454318	3.80308e-08	3
YLR140W		0.775754	0.0128675	4.55267e-08	2
YGL252C	RTG2	0.593973	0.239112	4.60266e-08	3
YBR173C	UMP1	0.575214	0.36023	8.90742e-08	3
YLR264C-A		0.56702	0.174095	1.29239e-07	3
YGR017W		0.56557	0.343035	1.29239e-07	3
YBR215W	HPC2	0.565072	0.0352885	1.29239e-07	3
YOR038C	HIR2	0.559923	0.153699	1.70461e-07	3
YFL022C	FRS2	0.541871	0.0619824	3.22839e-07	3
YOR046C	DBP5	0.531744	0.0486959	4.62994e-07	3
YGL014W	PUF4	0.530486	0.309805	4.62994e-07	3
YLR039C	RIC1	0.528726	0.0434865	5.06425e-07	3
YLR418C	CDC73	0.527288	0.0854015	5.53824e-07	3
YOR106W	VAM3	0.51307	0.186963	8.63873e-07	3
YCL032W	STE50	0.512474	0.14642	9.43686e-07	3
YKL056C	TMA19	0.508825	0.192598	1.03069e-06	3
YKL139W	CTK1	0.663722	0.0421843	1.28675e-06	2
YGR240C	PFK1	0.497662	0.570001	1.46401e-06	3
YJR114W		0.494894	0.0987763	1.74297e-06	3
YLR357W	RSC2	0.488572	0.240373	2.07361e-06	3
YGR018C		0.481062	0.344315	2.68723e-06	3
YGL023C	PIB2	0.479777	0.166525	2.9287e-06	3
YLR087C	CSF1	0.479638	0.246558	2.9287e-06	3
YBR131W	CCZ1	0.478679	0.375414	2.9287e-06	3
YGL001C	ERG26	0.476637	0.159035	3.19131e-06	3
YPR064W		0.471318	0.558228	3.78722e-06	3
YOR263C		0.471318	0.176189	3.78722e-06	3
YER145C	FTR1	0.467707	0.267882	4.12456e-06	3
YGL062W	PYC1	0.461315	0.166127	5.322e-06	3
YHR012W	VPS29	0.455494	0.304936	6.3019e-06	3
YIR037W	HYR1	0.604915	0.0230292	6.33293e-06	2
YOR255W	OSW1	0.454816	0.175513	6.85563e-06	3
YDL224C	WHI4	0.452725	0.324993	6.85563e-06	3
YJR145C	RPS4A	0.45063	0.382116	7.4566e-06	3
YBR122C	MRPL36	0.449665	0.15598	8.10871e-06	3
YOL066C	RIB2	0.448172	0.151651	8.10871e-06	3
YGR204W	ADE3	0.445638	0.583732	8.81616e-06	3
YLR284C	ECI1	0.443833	0.334367	9.58347e-06	3
YNL286W	CUS2	0.440082	0.179483	1.04155e-05	3
YBL008W	HIR1	0.437502	0.120782	1.13176e-05	3
YNL315C	ATP11	0.43245	0.638283	1.45029e-05	3
YLR349W		0.430308	0.301964	1.45029e-05	3
YLR348C	DIC1	0.427953	0.312179	1.57463e-05	3
YNL183C	NPR1	0.426888	0.28462	1.70928e-05	3
YGR118W	RPS23A	0.424847	0.235998	1.85506e-05	3
YMR061W	RNA14	0.422168	0.0411242	2.01286e-05	3
YLR239C	LIP2	0.41992	0.0723477	2.18362e-05	3
YJL138C	TIF2	0.419557	0.223991	2.18362e-05	3
YLR148W	PEP3	0.551293	0.0110048	2.31902e-05	2
YJL011C	RPC17	0.413209	0.0540507	2.56821e-05	3
YPL240C	HSP82	0.412269	0.375135	2.78431e-05	3
YDR186C		0.411615	0.0895376	2.78431e-05	3
YDR006C	SOK1	0.400671	0.111836	3.83818e-05	3
YOL059W	GPD2	0.400325	0.114115	3.83818e-05	3
YOR137C	SIA1	0.400147	0.258049	3.83818e-05	3
YOR277C		0.39888	0.0770603	4.15661e-05	3
YJL068C		0.397746	0.404589	4.15661e-05	3
YOR126C	IAH1	0.396101	0.211831	4.50047e-05	3
YGL024W		0.395549	0.205231	4.50047e-05	3
YKL156W	RPS27A	0.39073	0.0311177	5.27236e-05	3
YPR099C		0.517006	0.354607	5.28333e-05	2
YGR259C		0.516294	0.236078	5.28333e-05	2
YOL063C	CRT10	0.388835	0.251005	5.70471e-05	3
YKL040C	NFU1	0.387198	0.0281307	6.17113e-05	3
YKL047W		0.384902	0.24651	6.6742e-05	3
YPR106W	ISR1	0.384868	0.0794385	6.6742e-05	3
YNL192W	CHS1	0.382997	0.0971287	6.6742e-05	3
YBR105C	VID24	0.382063	0.645341	7.21666e-05	3
YOR238W		0.381843	0.0808853	7.21666e-05	3
YLR438C-A	LSM3	0.37959	0.0695936	7.80146e-05	3
YJR087W		0.378343	0.0455826	7.80146e-05	3
YKR004C-A		0.377091	0.088234	8.43176e-05	3
YGR081C	SLX9	0.374178	0.104999	9.11095e-05	3
YPR133C	SPN1	0.490975	0.120483	9.36164e-05	2
YJR007W	SUI2	0.37129	0.0756756	9.84265e-05	3
YLR200W	YKE2	0.489533	0.0254633	9.9068e-05	2
YLR342W	FKS1	0.369164	0.278712	0.000106307	3
YOR111W		0.368359	0.0299415	0.000106307	3
YNL325C	FIG4	0.367425	0.0995795	0.000114794	3
YOR378W		0.367041	0.280532	0.000114794	3
YDR019C	GCV1	0.366595	0.0567017	0.000114794	3
YOR273C	TPO4	0.366318	0.265405	0.000114794	3
YJR113C	RSM7	0.365316	0.100808	0.000114794	3
YDL085W	NDE2	0.365196	0.318924	0.000114794	3
YOR124C	UBP2	0.364903	0.15715	0.000123931	3
YLR279W		0.363415	0.312425	0.000123931	3
YMR221C		0.35936	0.160153	0.000144348	3
YLR287-A		0.357989	0.330091	0.000144348	3
YKL061W		0.357566	0.0190868	0.000144348	3
YML001W	YPT7	0.357531	0.0908956	0.000144348	3
YPL271W	ATP15	0.469325	0.226851	0.000155292	2
YGR092W	DBF2	0.354392	0.0973536	0.000167984	3
YPL138C	SPP1	0.353956	0.022278	0.000167984	3
YNL212W	VID27	0.353083	0.377469	0.000167984	3
YOR256C	TRE2	0.463526	0.402576	0.00017362	2
YMR189W	GCV2	0.351787	0.103826	0.000181158	3
YLR167W	RPS31	0.349334	0.0921267	0.000195323	3
YOL038W	PRE6	0.346908	0.259877	0.000210552	3
YKL169C		0.454135	0.0963634	0.00021684	2
YDR009W	GAL3	0.344294	0.18157	0.000226921	3
YKL168C	KKQ8	0.343725	0.153162	0.000226921	3
YBR084W	MIS1	0.343354	0.157515	0.000226921	3
YOR233W	KIN4	0.342799	0.0688355	0.000226921	3
YFL004W	VTC2	0.342761	0.205296	0.000226921	3
YOR223W		0.342707	0.177481	0.000226921	3
YER064C		0.34223	0.115408	0.000244513	3
YPL139C	UME1	0.342199	0.0382395	0.000244513	3
YKL020C	SPT23	0.342037	0.0548498	0.000244513	3
YPL069C	BTS1	0.34082	0.232096	0.000244513	3
YJL053W	PEP8	0.340542	0.269918	0.000244513	3
YKL163W	PIR3	0.340533	0.147457	0.000244513	3
YNL096C	RPS7B	0.33996	0.208557	0.000263415	3
YER167W	BCK2	0.33773	0.152419	0.000263415	3
YBL094C		0.443726	0.129846	0.000270553	2
YIL034C	CAP2	0.442372	0.163925	0.000285905	2
YFL033C	RIM15	0.438484	0.147485	0.000302111	2
YBL001C	ECM15	0.333534	0.398192	0.000305533	3
YGR257C	MTM1	0.435663	0.19591	0.000319221	2
YLR268W	SEC22	0.330727	0.305439	0.000328958	3
YER025W	GCD11	0.33068	0.09941	0.000328958	3
YGL028C	SCW11	0.330612	0.637226	0.000328958	3
YJL204C	RCY1	0.330085	0.192551	0.000328958	3
YBR121C	GRS1	0.329645	0.5782	0.000354111	3
YKL051W	SFK1	0.329549	0.0813791	0.000354111	3
YBR013C		0.329333	0.384432	0.000354111	3
YBR011C	IPP1	0.328398	0.0444112	0.000354111	3
YKL175W	ZRT3	0.328154	0.0767673	0.000354111	3
YDL170W	UGA3	0.32697	0.122504	0.000381116	3
YOR280C	FSH3	0.326393	0.157383	0.000381116	3
YDR431W		0.323684	0.0231872	0.000410105	3
YER059W	PCL6	0.323311	0.125855	0.000410105	3
YGR220C	MRPL9	0.322712	0.483891	0.000410105	3
YKR040C		0.422779	0.100842	0.000420152	2
YJL067W		0.321366	0.32335	0.000441219	3
YPL068C		0.320542	0.227265	0.000441219	3
YHR013C	ARD1	0.419077	0.0717334	0.000468812	2
YNR075W	COS10	0.418227	0.0489149	0.000468812	2
YLR317W		0.31809	0.0159124	0.000474609	3
YGL003C	CDH1	0.417468	0.107365	0.000495185	2
YDR524C	AGE1	0.317361	0.138257	0.000510437	3
YDR399W	HPT1	0.316494	0.189149	0.000510437	3
YKL215C		0.316399	0.252568	0.000510437	3
YCR065W	HCM1	0.315134	0.0737714	0.000510437	3
YKL151C		0.314328	0.0897394	0.000548876	3
YDR446W	ECM11	0.313433	0.524668	0.000548876	3
YGL020C	GET1	0.312779	0.264662	0.000548876	3
YOR225W		0.312357	0.0749321	0.00059011	3
YMR202W	ERG2	0.312171	0.0815503	0.00059011	3
YPR040W	TIP41	0.309888	0.0998808	0.000634338	3
YER169W	RPH1	0.308845	0.130325	0.000634338	3
YKL043W	PHD1	0.308773	0.10289	0.000634338	3
YBL091C	MAP2	0.307653	0.313689	0.000634338	3
YOR108W	LEU9	0.3075	0.0836581	0.000634338	3
YDL086W		0.307494	0.445782	0.000681772	3
YGL005C	COG7	0.306542	0.031269	0.000681772	3
YKL050C		0.30599	0.0638124	0.000681772	3
YNL311C		0.305929	0.0836297	0.000681772	3
YNR032W	PPG1	0.305852	0.136995	0.000681772	3
YMR314W	PRE5	0.305562	0.529979	0.000681772	3
YJR140C	HIR3	0.304484	0.0772464	0.000732637	3
YJR077C	MIR1	0.304165	0.228714	0.000732637	3
YKL029C	MAE1	0.303818	0.167428	0.000732637	3
YPL257W		0.303597	0.251958	0.000732637	3
YLR289W	GUF1	0.303554	0.0826287	0.000732637	3
YGR023W	MTL1	0.302883	0.195113	0.000732637	3
YPR107C	YTH1	0.302801	0.00744552	0.000732637	3
YER124C	DSE1	0.397	0.134546	0.000766061	2
YNL104C	LEU4	0.301532	0.308339	0.000787176	3
YOR264W	DSE3	0.301237	0.0770622	0.000787176	3
YGL107C	RMD9	0.299324	0.153044	0.000845647	3
YOR253W	NAT5	0.298952	0.0415602	0.000845647	3
YMR137C	PSO2	0.298654	0.303793	0.000845647	3
YNL058C		0.298019	0.301468	0.000845647	3
YKL167C	MRP49	0.297915	0.232945	0.000845647	3
YJL124C	LSM1	0.29742	0.194779	0.000908327	3
YLR283W		0.29425	0.168977	0.000975511	3
YOR281C	PLP2	0.293271	0.167907	0.000975511	3
YKL149C	DBR1	0.293095	0.0709336	0.000975511	3
